# Supplementary material for: Structural Optimization of BIPPO Analogs as Potent Antimalarials
Source: MDPI journal article supplement (doi:10.3390/molecules28134939), 2023-06-23
Supplement: s1 [file s1]

# Structural optimization of BIPPO analogs as potent antimalarials

Yang Zheng,<sup>1</sup> An Matheeussen,<sup>2</sup> Louis Maes,<sup>2</sup> Guy Caljon,<sup>2</sup> Geert Jan Sterk<sup>1</sup> and Rob Leurs<sup>1,\*</sup>

<sup>1</sup> Amsterdam Institute for Molecules, Medicines and Systems, Division of Medicinal Chemistry, Faculty of Science, VU University Amsterdam, De Boelelaan 1083, 1081 HV Amsterdam, the Netherlands.

<sup>2</sup> Laboratory of Microbiology, Parasitology and Hygiene, University of Antwerp, 2610 Wilrijk, Belgium.

## Table of contents

|              |                                                           |
|--------------|-----------------------------------------------------------|
| Page S2.     | Table S1. In vitro microsomal stability of BIPPO analogs. |
| Page S3-S92. | LCMS, NMR spectra of intermediates and final compounds.   |

Table S1. In vitro microsomal stability of BIPPO analogs. Diclofenac was used as a reference compound.

| Phase I/II | Time (min)  | % 23 remaining |     | % 28 remaining |     | % 29 remaining |     | % 30 remaining |     | % 47a remaining |     | % 47b remaining |     | Diclofenac |
|------------|-------------|----------------|-----|----------------|-----|----------------|-----|----------------|-----|-----------------|-----|-----------------|-----|------------|
|            |             | Mean           | SD  | Mean           | SD  | Mean           | SD  | Mean           | SD  | Mean            | SD  | Mean            | SD  |            |
| Mouse      | CYP-NADPH   | 0              | 100 | -              | 100 | -              | 100 | -              | 100 | -               | 100 | -               | 100 | 100        |
|            |             | 15             | 81  | 2.0            | 94  | 8.4            | 68  | 3.1            | 48  | 2.4             | 104 | 12.1            | 16  | 77         |
|            |             | 30             | 61  | 1.3            | 88  | 2.4            | 50  | 0.8            | 21  | 0.59            | 90  | 11.7            | 3   | 66         |
|            |             | 60             | 38  | 2.9            | 68  | 5.7            | 26  | 1.6            | 10  | 0.31            | 38  | 9.7             | 2   | 49         |
|            | UGT Enzymes | 0              | 100 | -              | 100 | -              | 100 | -              | 100 | -               | 100 | -               | 100 | 100        |
|            |             | 15             | 92  | 4.7            | 100 | 1.8            | 101 | 0.5            | 106 | 0.6             | 92  | 16.6            | 101 | 33         |
|            |             | 30             | 77  | 3.6            | 97  | 1.1            | 89  | 7.0            | 98  | 0.5             | 85  | 19.3            | 109 | 34         |
|            |             | 60             | 57  | 0.4            | 99  | 6.5            | 87  | 5.5            | 106 | 3.5             | 98  | 14.4            | 112 | 32         |
| Human      | CYP-NADPH   | 0              | 100 | -              | 100 | -              | 100 | -              | 100 | -               | 100 | -               | 100 | 100        |
|            |             | 15             | 97  | 3.9            | 92  | 0.6            | 102 | 15.4           | 100 | 23.2            | 113 | 2.5             | 98  | 28         |
|            |             | 30             | 93  | 3.3            | 85  | 2.3            | 89  | 14.5           | 88  | 10.9            | 113 | 4.2             | 89  | 7          |
|            |             | 60             | 81  | 5.5            | 75  | 1.3            | 93  | 19.7           | 66  | 7.7             | 116 | 2.6             | 51  | 1          |
|            | UGT Enzymes | 0              | 100 | -              | 100 | -              | 100 | -              | 100 | -               | 100 | -               | 100 | 100        |
|            |             | 15             | 97  | 1.5            | 106 | 2.2            | 104 | 11.2           | 88  | 2.6             | 112 | 3.3             | 104 | 11         |
|            |             | 30             | 96  | 4.3            | 102 | 2.7            | 104 | 10.4           | 88  | 10.5            | 97  | 18.1            | 106 | 10         |
|            |             | 60             | 89  | 5.7            | 106 | 5.6            | 84  | 8.5            | 81  | 0.5             | 108 | 8.4             | 110 | 9          |



Acquired by : Admin  
 Date Acquired : 11/6/2019 8:48:12 AM  
 Sample Name : BIPPO  
 Sample ID :  
 Tray# : 1  
 Vial# : 1  
 Injection Volume : 2  
 Data File : C:\LabSolutions\Data\2019\wk24\BIPPO1cd  
 Background File : Blanco110620191cd  
 Method File : Method SCAN ACID standard1cm  
 Report Format : DefaultLCMS1cr  
 Tuning File : C:\LabSolutions\Tuning\Tuning-ESI-pos-neg01072015a1ct  
 Processed by : Admin  
 Modified Date : 11/6/2019 9:17:16 AM

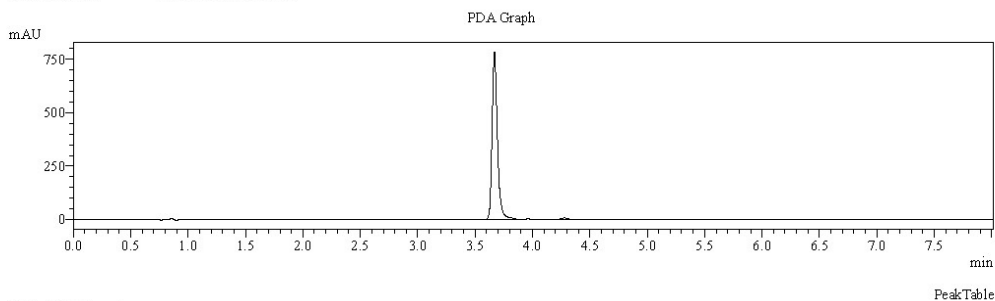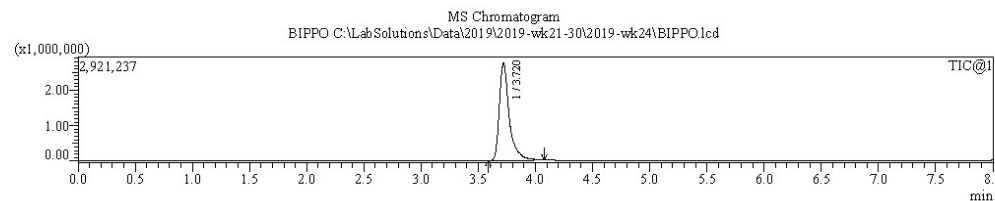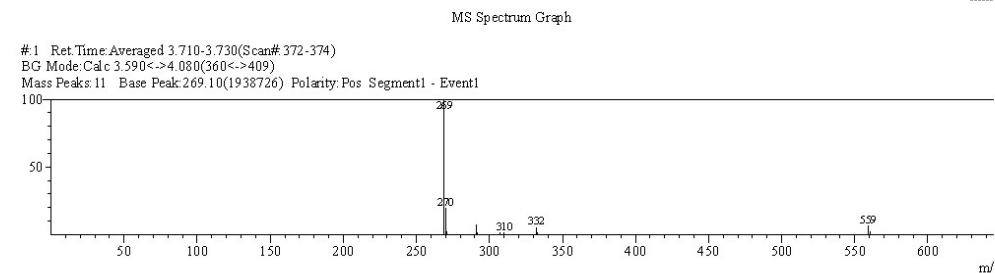

MS Spectrum Table

#1 Ret Time:  
BG Mode: Calc 3.590<->4.080(360<->409)  
Mass Peaks: 11 Base Peak: 269.10(1938726) Polarity: Pos Segment1 - Event1

| # | m/z    | Abs.Inten. | Rel.Inten. | Charge | Polarity | Monoisotopic | #  | m/z    | Abs.Inten. | Rel.Inten. | Charge | Polarity | Monoisotopic |
|---|--------|------------|------------|--------|----------|--------------|----|--------|------------|------------|--------|----------|--------------|
| 1 | 269.10 | 1938726    | 100.00     |        |          |              | 7  | 310.15 | 25842      | 1.33       |        |          |              |
| 2 | 270.10 | 372456     | 19.21      |        |          |              | 8  | 332.10 | 103390     | 5.33       |        |          |              |
| 3 | 271.05 | 38608      | 1.99       |        |          |              | 9  | 333.10 | 21381      | 1.10       |        |          |              |
| 4 | 291.10 | 138093     | 7.12       |        |          |              | 10 | 559.30 | 122379     | 6.31       |        |          |              |
| 5 | 292.05 | 27110      | 1.40       |        |          |              | 11 | 560.30 | 39867      | 2.06       |        |          |              |
| 6 | 307.05 | 21862      | 1.13       |        |          |              |    |        |            |            |        |          |              |

Figure S1. LCMS spectrum of compound 3.

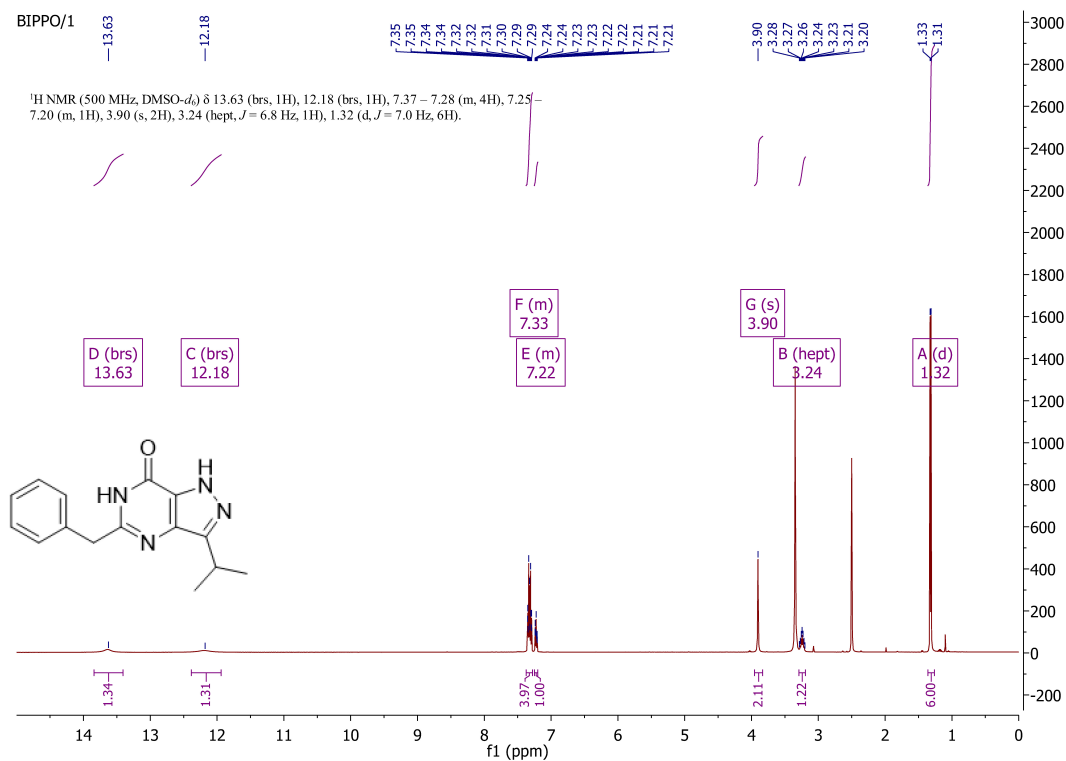

Figure S2.  $^1\text{H}$  NMR spectrum of compound **3**.

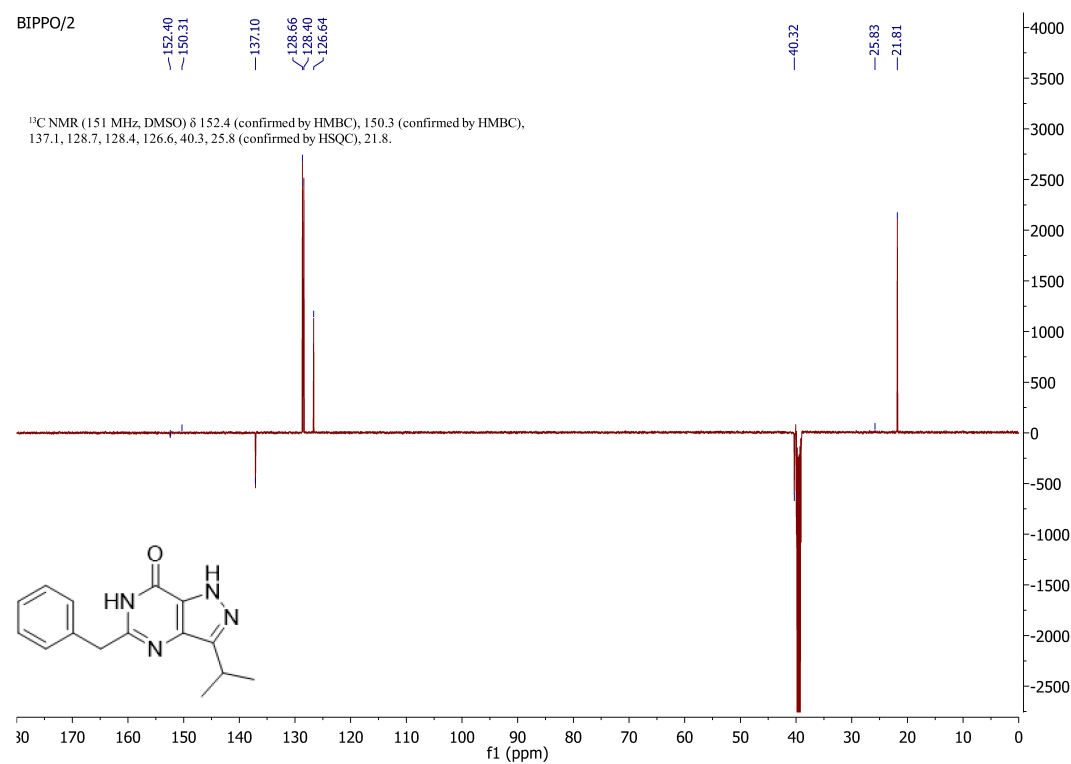

Figure S3.  $^{13}\text{C}$  NMR spectrum of compound **3**.

Acquired by : Admin  
 Date Acquired : 4/20/2016 2:03:12 PM  
 Sample Name : YAZH-115  
 Sample ID :  
 Tray# : 1  
 Vial# : 33  
 Injection Volume : 1  
 Data File : C:\LabSolutions\Data\2016 - wk16\YAZH-115.lcd  
 Background File : blanco 20042016.lcd  
 Method File : Method SCAN ACID standard.lcm  
 Report Format : DefaultL.CMS.lcr  
 Tuning File : C:\LabSolutions\Tuning\Tuning-ESI-pos-neg01072015a.lct  
 Processed by : Admin  
 Modified Date : 4/20/2016 2:22:13 PM

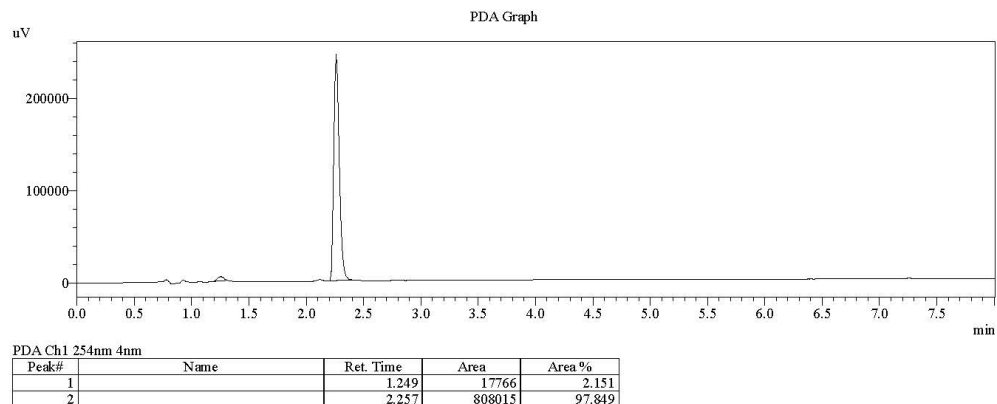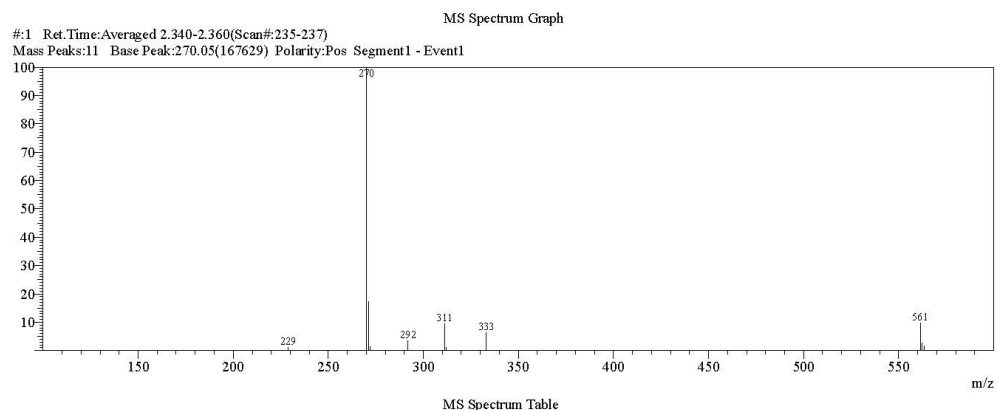

MS Spectrum Table

#1 Ret.Time:  
 BG Mode:Calc 2.250<->2.510(226<->252)

| # | m/z    | Abs.Inten. | Rel.Inten. | Charge | Polarity | Monoisotopic | #  | m/z    | Abs.Inten. | Rel.Inten. | Charge | Polarity | Monoisotopic |
|---|--------|------------|------------|--------|----------|--------------|----|--------|------------|------------|--------|----------|--------------|
| 1 | 228.95 | 2033       | 1.21       |        |          |              | 7  | 312.20 | 1915       | 1.14       |        |          |              |
| 2 | 270.05 | 167629     | 100.00     |        |          |              | 8  | 333.15 | 10548      | 6.29       |        |          |              |
| 3 | 271.10 | 28885      | 17.23      |        |          |              | 9  | 561.30 | 16070      | 9.59       |        |          |              |
| 4 | 272.15 | 2103       | 1.25       |        |          |              | 10 | 562.20 | 4684       | 2.79       |        |          |              |
| 5 | 292.00 | 5834       | 3.48       |        |          |              | 11 | 563.35 | 2637       | 1.57       |        |          |              |
| 6 | 311.10 | 15897      | 9.48       |        |          |              |    |        |            |            |        |          |              |

Figure S4. LCMS spectrum of compound 4.

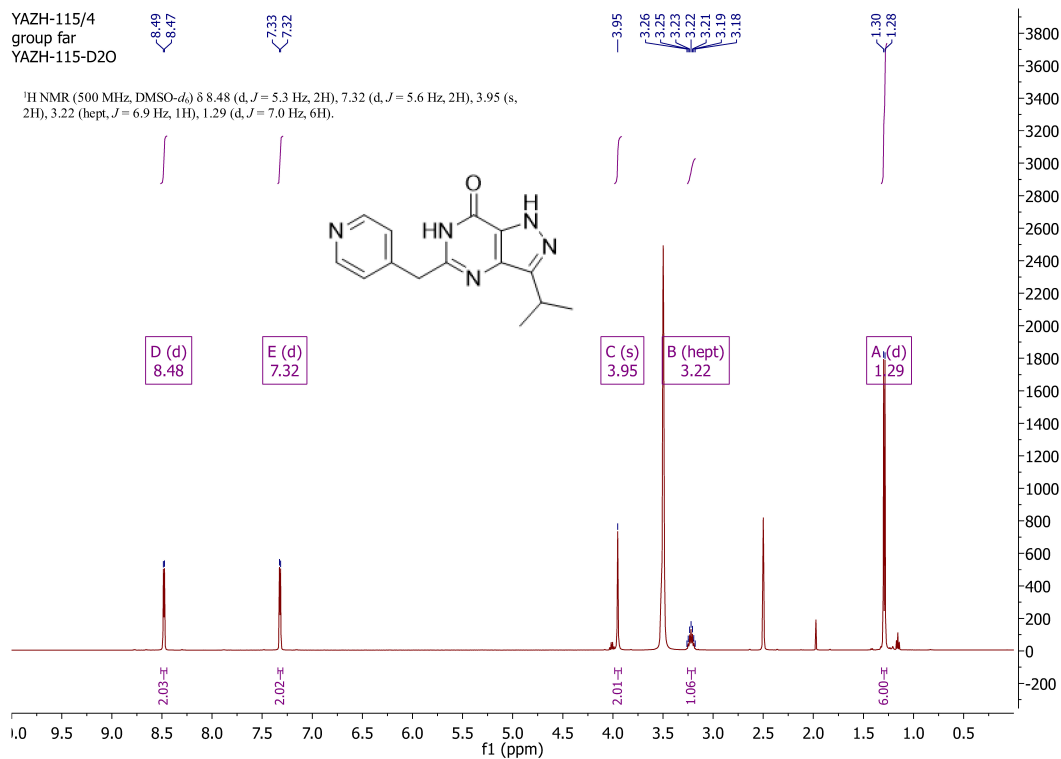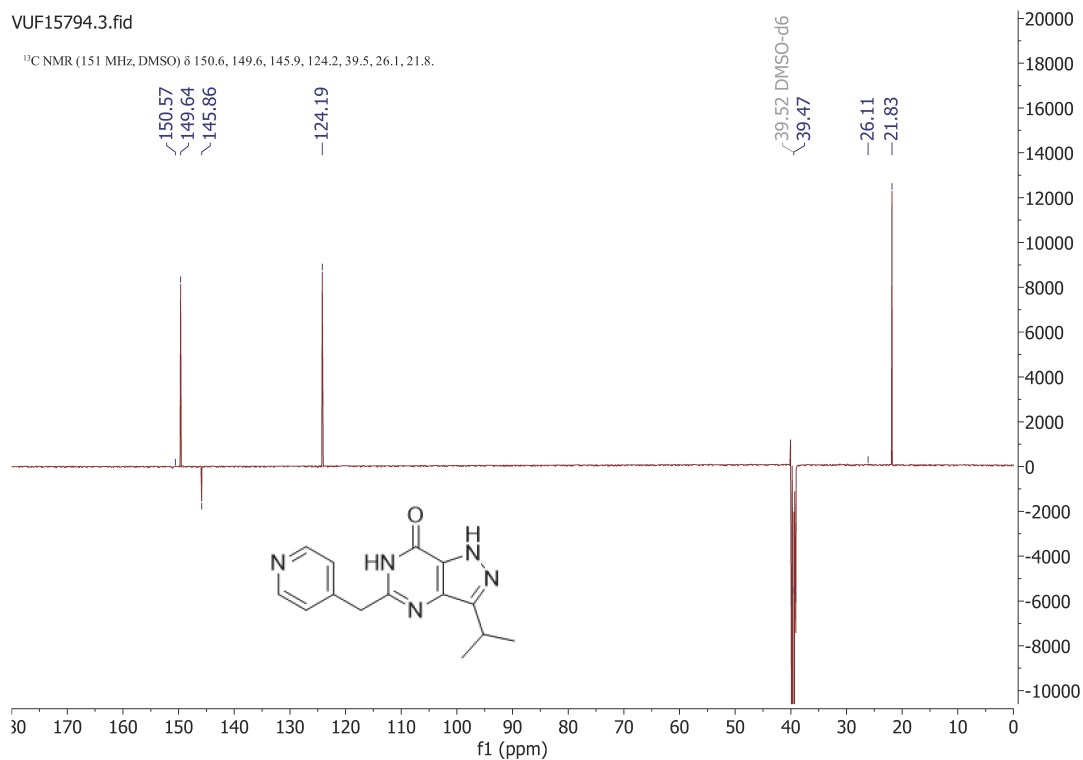

Acquired by : Admin  
 Date Acquired : 18/5/2020 10:17:40 AM  
 Sample Name : VUF14762  
 Sample ID :  
 Tray# : 1  
 Vial# : 2  
 Injection Volume : 5  
 Data File : C:\LabSolutions\Data\2020\wk21\VUF14762.lcd  
 Background File : blanco18052020.lcd  
 Method File : Method SCAN ACID standard.lcm  
 Report Format : DefaultLCMS.lcr  
 Tuning File : C:\LabSolutions\Tuning\Tuning-ESI-pos-neg01072015a1ct  
 Processed by : Admin  
 Modified Date : 18/5/2020 11:40:37 AM

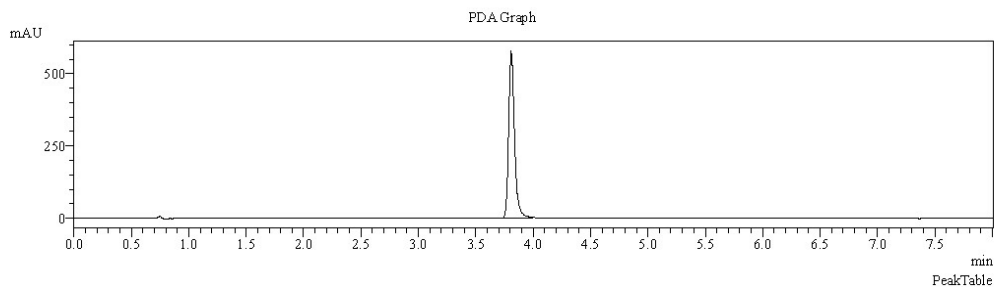

PDA Ch1 254nm 4nm

| Peak# | Name | Ret. Time | Area    | Area%   |
|-------|------|-----------|---------|---------|
| 1     |      | 3.804     | 2001393 | 100.000 |

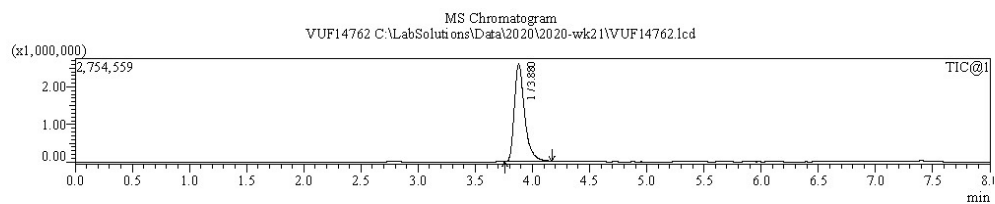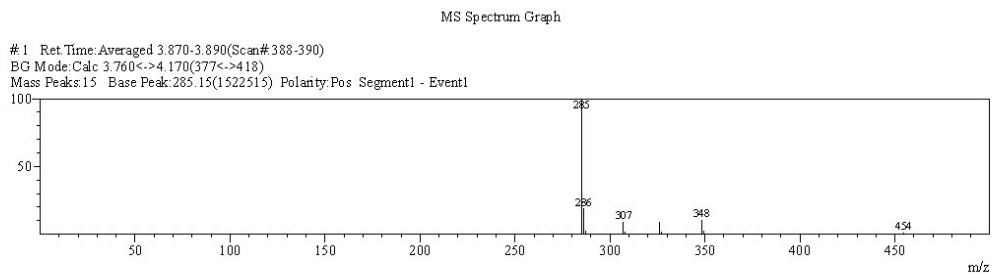

MS Spectrum Table

#1 Ret. Time:  
 BG Mode: Calc 3.760<->4.170 (377<->418)  
 Mass Peaks: 15 Base Peak: 285.15 (1522515) Polarity: Pos Segment1 - Event1

| #  | m/z    | Abs.Inten. | Rel.Inten. | Charge | Polarity | Monoisotopic |
|----|--------|------------|------------|--------|----------|--------------|
| 1  | 285.15 | 1522515    | 100.00     |        |          |              |
| 2  | 286.15 | 289149     | 18.99      |        |          |              |
| 3  | 287.15 | 29062      | 1.91       |        |          |              |
| 4  | 307.15 | 136443     | 8.96       |        |          |              |
| 5  | 308.15 | 26916      | 1.77       |        |          |              |
| 6  | 326.20 | 128833     | 8.46       |        |          |              |
| 7  | 327.20 | 27427      | 1.80       |        |          |              |
| 8  | 348.15 | 158628     | 10.42      |        |          |              |
| 9  | 349.25 | 36134      | 2.37       |        |          |              |
| 10 | 454.55 | 16442      | 1.08       |        |          |              |
| 11 | 591.40 | 46174      | 3.03       |        |          |              |
| 12 | 592.40 | 15798      | 1.04       |        |          |              |
| 13 | 596.40 | 26961      | 1.77       |        |          |              |
| 14 | 596.70 | 48665      | 3.20       |        |          |              |
| 15 | 597.75 | 22692      | 1.49       |        |          |              |

Figure S7. LCMS spectrum of compound 5.

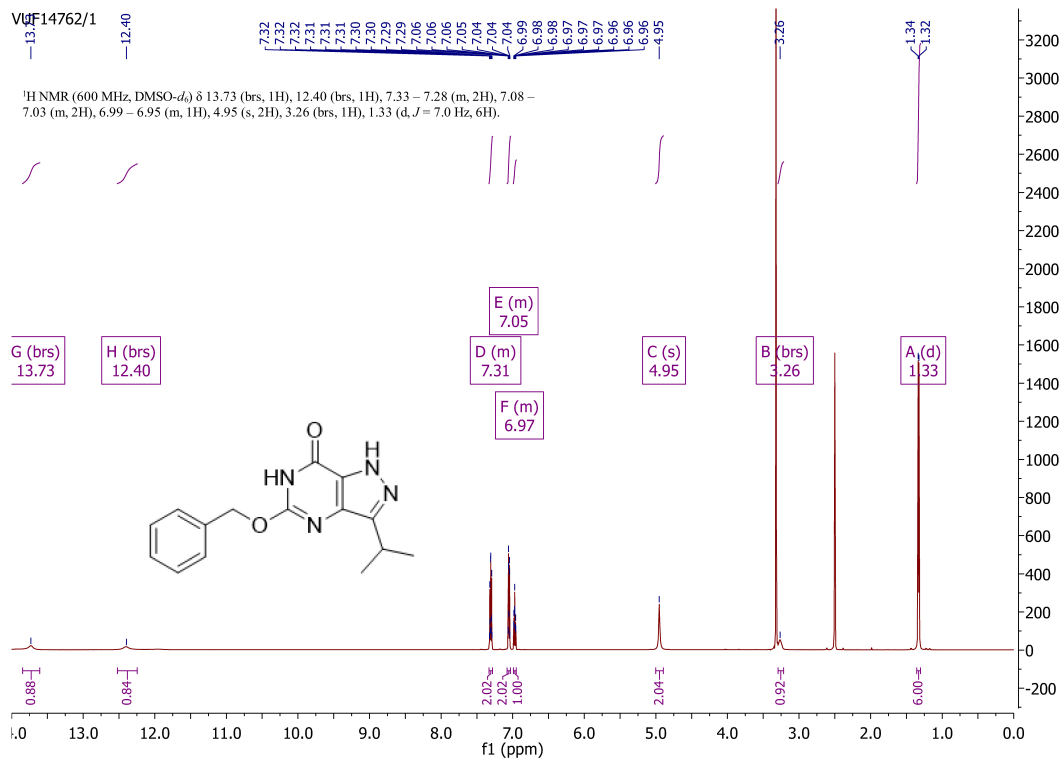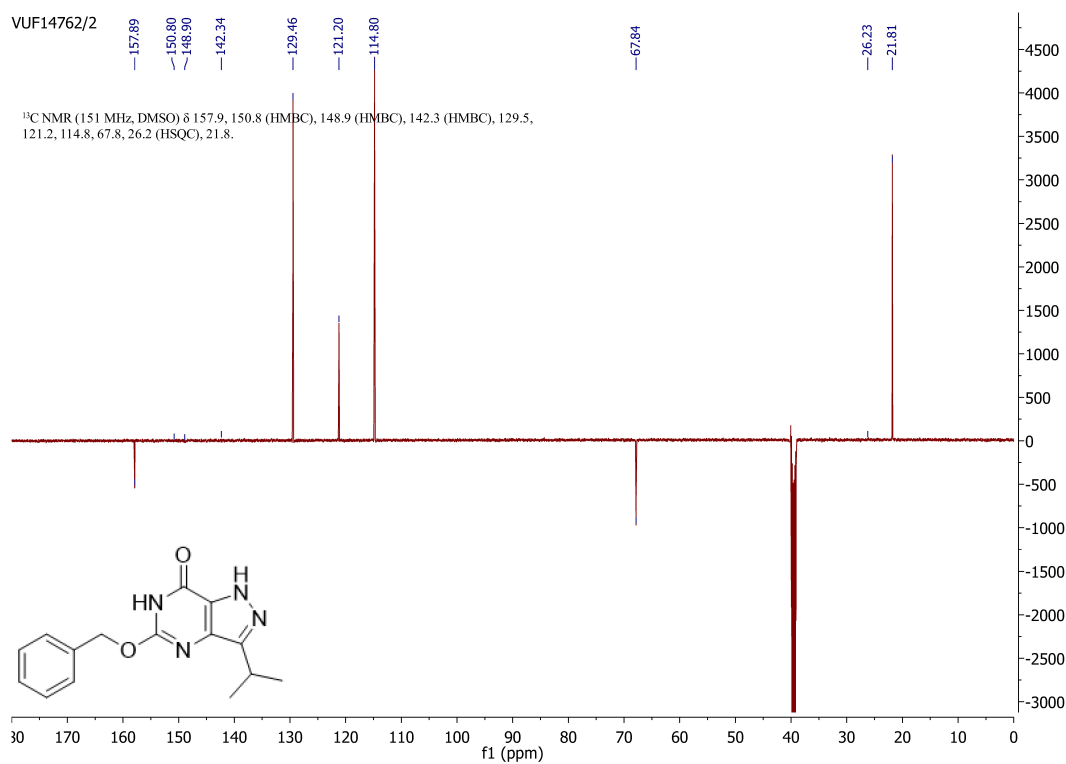

Acquired by : Admin  
 Date Acquired : 7/14/2017 4:35:06 PM  
 Sample Name : YAZH01-116  
 Sample ID :  
 Tray# : 1  
 Vial# : 28  
 Injection Volume : 10  
 Data File : C:\LabSolutions\Data\2017\wk28\YAZH01-116.lcd  
 Background File : BLANCO\_14072017.lcd  
 Method File : Method SCAN ACID standard.lcm  
 Report Format : DefaultLCMS1cr  
 Tuning File : C:\LabSolutions\Tuning\Tuning-ESI-pos-neg01072015a1ct  
 Processed by : Admin  
 Modified Date : 7/14/2017 5:24:01 PM

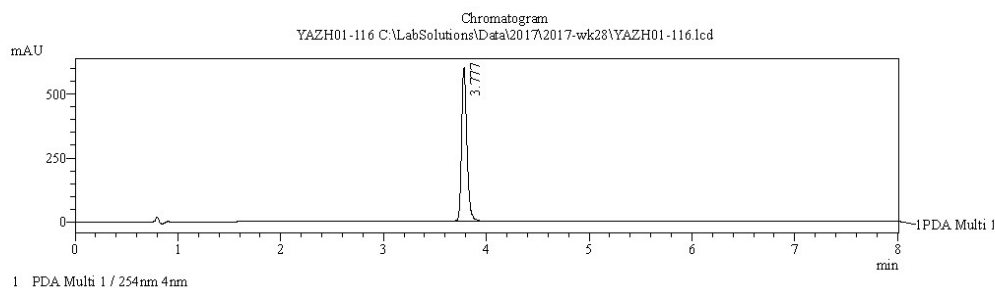

PDA Ch1 254nm 4nm

| Peak# | Name | Ret. Time | Area    | Area%   |
|-------|------|-----------|---------|---------|
| 1     |      | 3.777     | 2126142 | 100.000 |

PeakTable

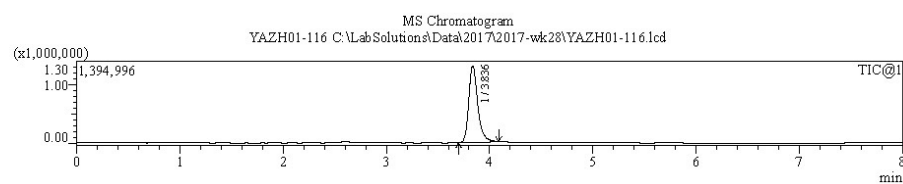

MS Spectrum Graph

#1 Ret.Time:Averaged 3.830-3.850(Scan# 384-386)

Mass Peaks:13 Base Peak:255.10(772560) Polarity:Pos Segment1 - Event1

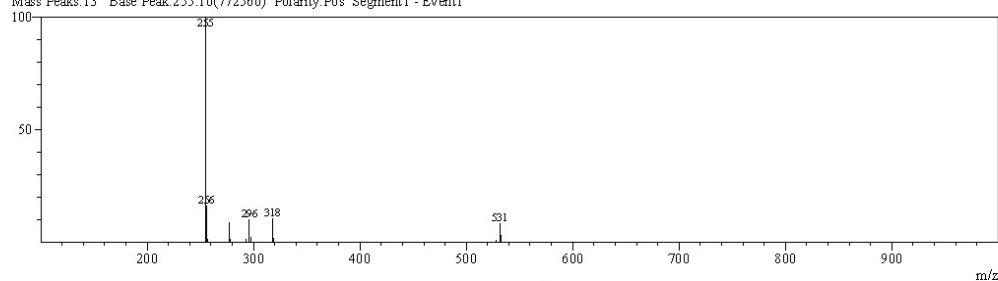

MS Spectrum Table

#1 Ret.Time:

BG Mode:Calc 3.700<->4.090(371<->410)

Mass Peaks:13 Base Peak:255.10(772560) Polarity:Pos Segment1 - Event1

| # | m/z    | Abs.Inten. | Rel.Inten. | Charge | Polarity | Monoisotopic | #  | m/z    | Abs.Inten. | Rel.Inten. | Charge | Polarity | Monoisotopic |
|---|--------|------------|------------|--------|----------|--------------|----|--------|------------|------------|--------|----------|--------------|
| 1 | 255.10 | 772560     | 100.00     |        |          |              | 8  | 297.15 | 16084      | 2.08       |        |          |              |
| 2 | 256.10 | 125886     | 16.29      |        |          |              | 9  | 318.10 | 80834      | 10.46      |        |          |              |
| 3 | 257.10 | 10257      | 1.33       |        |          |              | 10 | 319.10 | 15800      | 2.05       |        |          |              |
| 4 | 277.10 | 66368      | 8.59       |        |          |              | 11 | 528.50 | 7861       | 1.02       |        |          |              |
| 5 | 278.10 | 9738       | 1.26       |        |          |              | 12 | 531.30 | 64127      | 8.30       |        |          |              |
| 6 | 293.00 | 11959      | 1.55       |        |          |              | 13 | 532.30 | 24020      | 3.11       |        |          |              |
| 7 | 296.10 | 76995      | 9.97       |        |          |              |    |        |            |            |        |          |              |

Figure S10. LCMS spectrum of compound **6**.

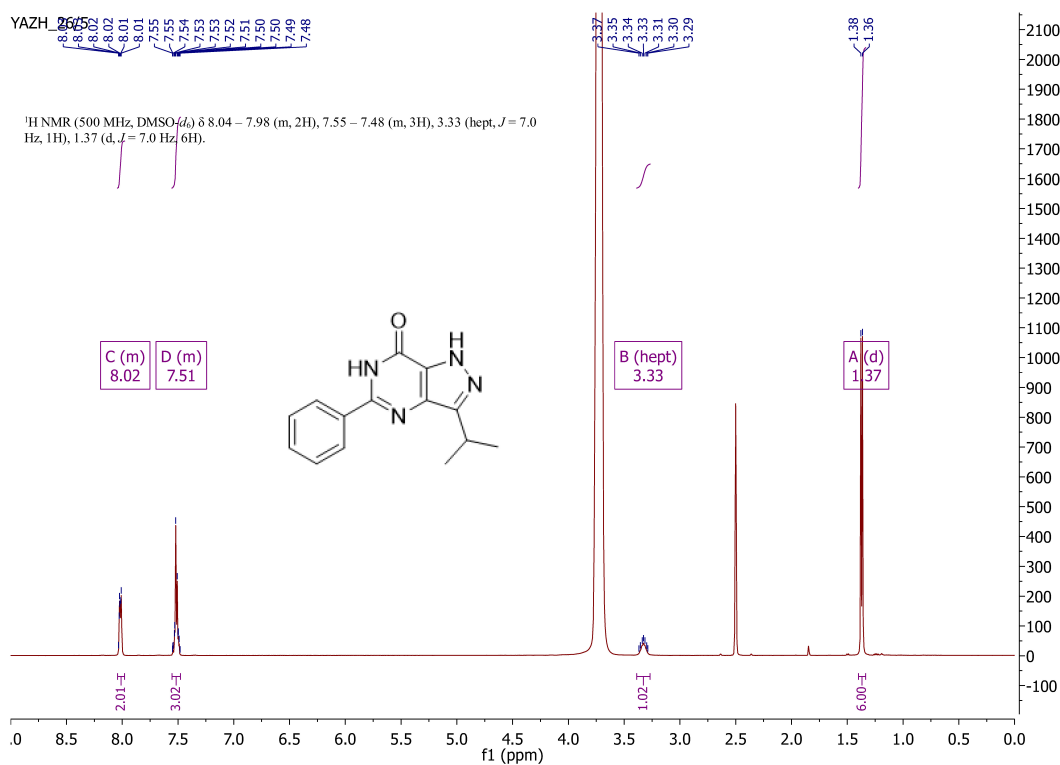

Figure S11. <sup>1</sup>H NMR spectrum of compound 6.

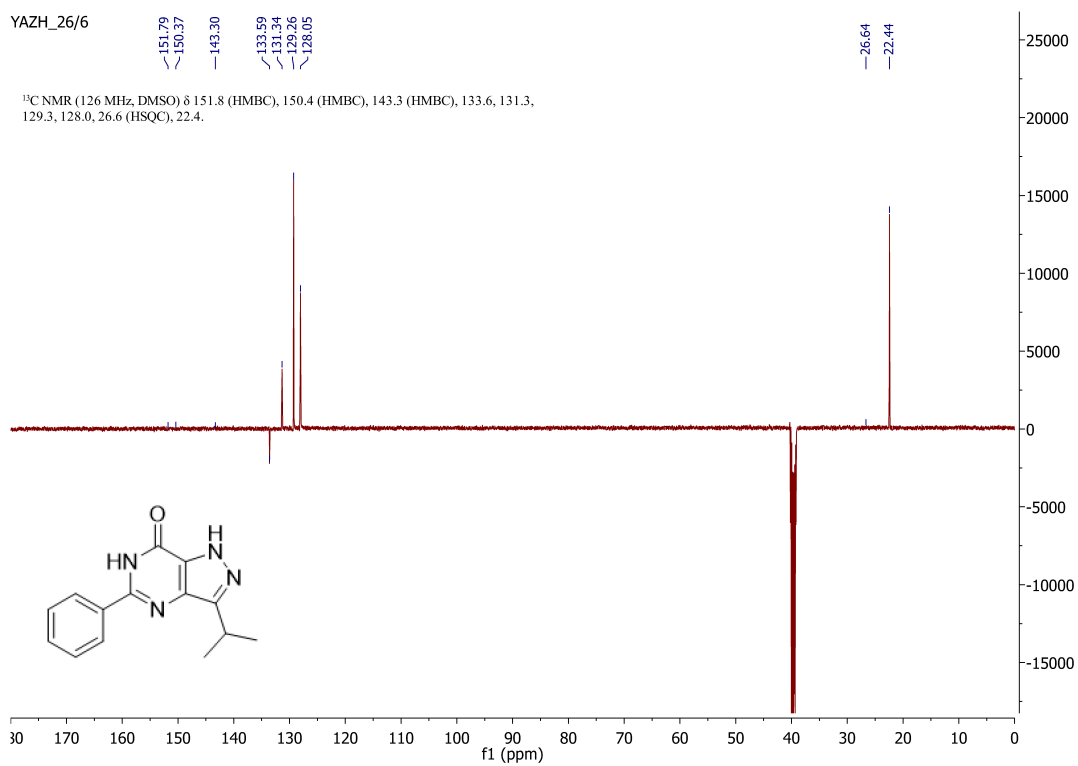

Figure S12. <sup>13</sup>C NMR spectrum of compound 6.



Acquired by : Admin  
 Date Acquired : 12/3/2018 11:54:17 AM  
 Sample Name : YAZH01-179  
 Sample ID :  
 Tray# : 1  
 Vial# : 8  
 Injection Volume : 5  
 Data File : C:\LabSolutions\Data\2018\2018-wk11\YAZH01-179.lcd  
 Background File : blanco\_120318.lcd  
 Method File : Method SCAN ACID standard.lcm  
 Report Format : DefaultLCMS.lcr  
 Tuning File : C:\LabSolutions\Tuning\Tuning-ESI-pos-neg01072015a.lct  
 Processed by : Admin  
 Modified Date : 7/6/2019 5:56:39 PM

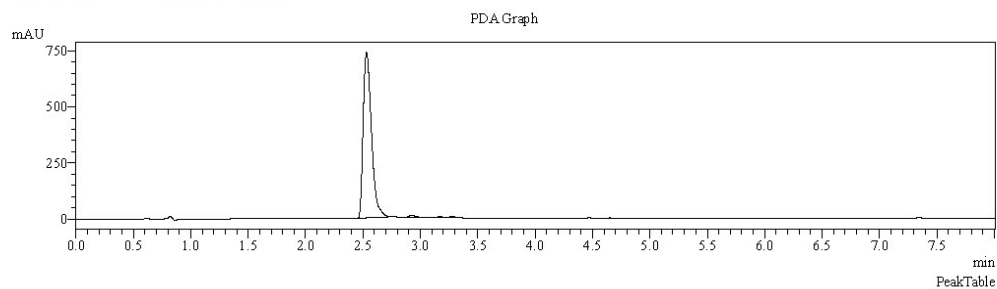

PDA.Ch1 254nm 4nm

| Peak# | Name | Ret. Time | Area    | Area % |
|-------|------|-----------|---------|--------|
| 1     |      | 2.526     | 3685980 | 98.260 |
| 2     |      | 2.922     | 37216   | 0.992  |
| 3     |      | 3.163     | 13353   | 0.356  |
| 4     |      | 3.272     | 14686   | 0.392  |

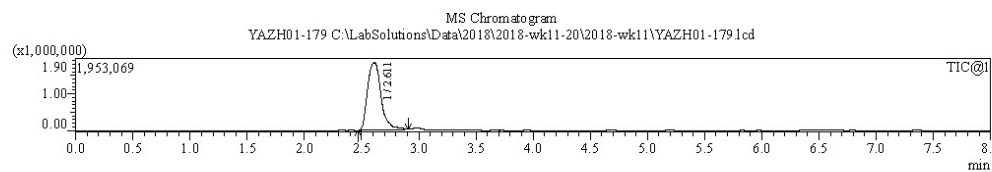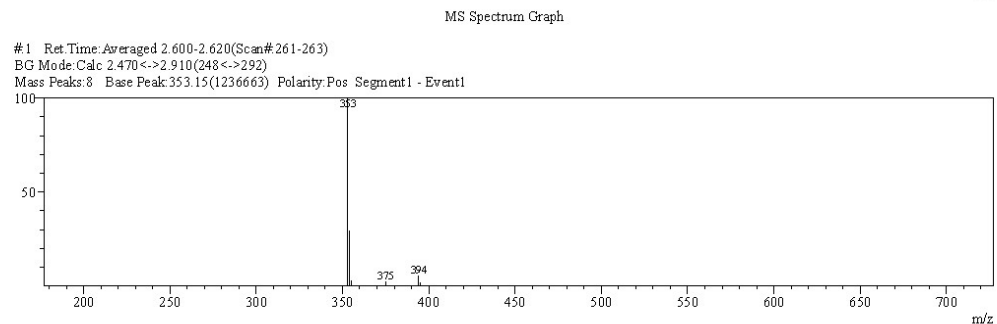

MS Spectrum Table

#1 Ret Time:  
 BG Mode: Calc 2.470<->2.910(248<->292)  
 Mass Peaks: 8 Base Peak: 353.15(1236663) Polarity: Pos Segment1 - Event1

| # | m/z    | Abs.Inten. | Rel.Inten. | Charge | Polarity | Monoisotopic | # | m/z    | Abs.Inten. | Rel.Inten. | Charge | Polarity | Monoisotopic |
|---|--------|------------|------------|--------|----------|--------------|---|--------|------------|------------|--------|----------|--------------|
| 1 | 176.95 | 20460      | 1.65       |        |          |              | 5 | 375.20 | 26493      | 2.14       |        |          |              |
| 2 | 353.15 | 1236663    | 100.00     |        |          |              | 6 | 394.20 | 66244      | 5.36       |        |          |              |
| 3 | 354.15 | 365052     | 29.52      |        |          |              | 7 | 395.20 | 19763      | 1.60       |        |          |              |
| 4 | 355.15 | 31125      | 2.52       |        |          |              | 8 | 727.35 | 20062      | 1.62       |        |          |              |

Figure S13. LCMS spectrum of compound 7.

YAZH01-179/1

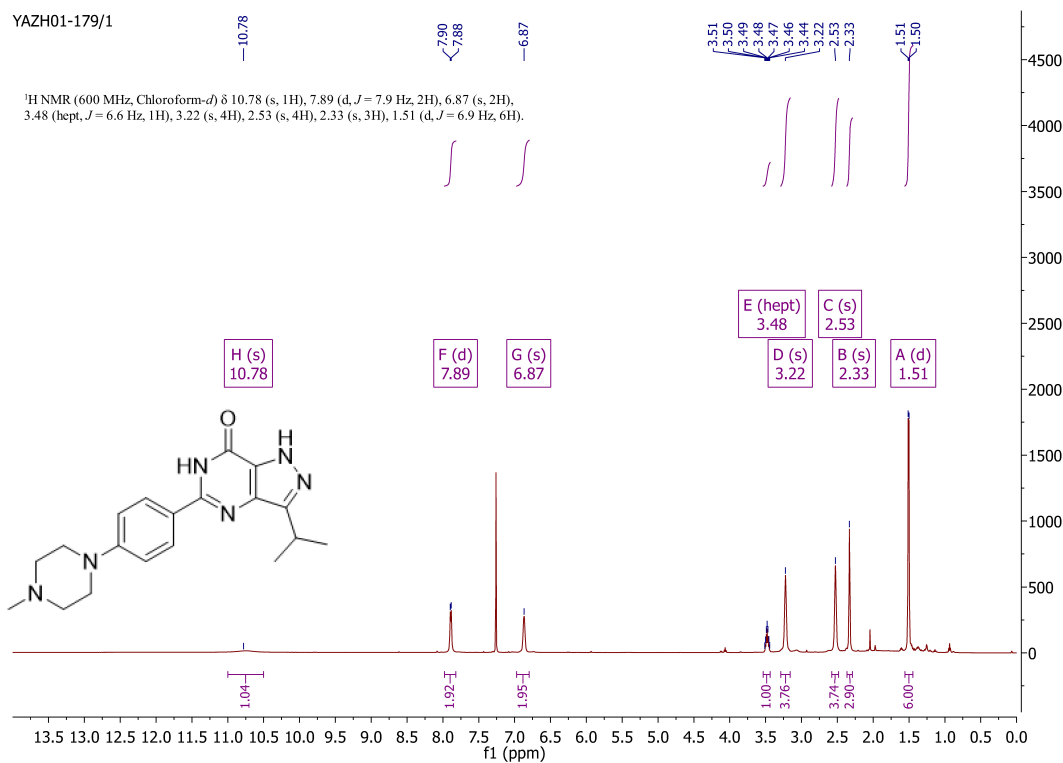Figure S14. <sup>1</sup>H NMR spectrum of compound 7.

YAZH01-179/2

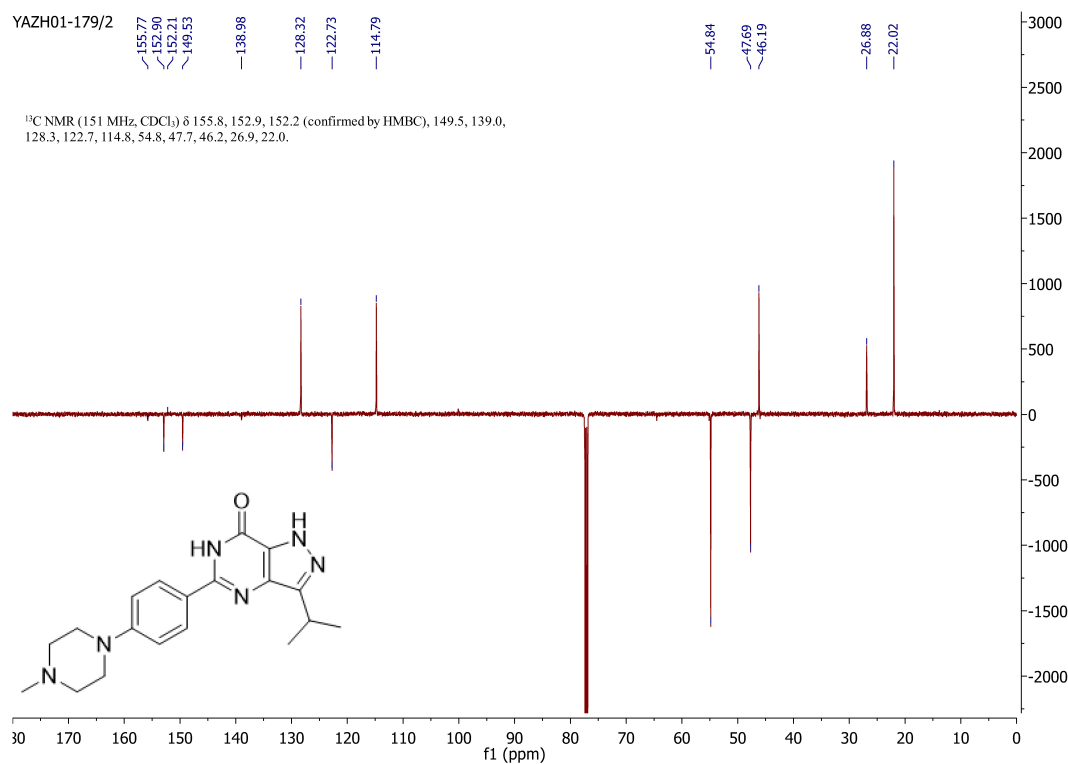Figure S15. <sup>13</sup>C NMR spectrum of compound 7.

Acquired by : Admin  
 Date Acquired : 18/6/2019 3:48:26 PM  
 Sample Name : VUF16503  
 Sample ID :  
 Tray# : 1  
 Vial# : 36  
 Injection Volume : 5  
 Data File : C:\LabSolutions\Data\2019\2019-wk25\VUF16503.lcd  
 Background File : blanco 18062019.lcd  
 Method File : Method SCAN ACID standard.lcm  
 Report Format : DefaultLCMS.lcr  
 Tuning File : C:\LabSolutions\Tuning\Tuning-ESI-pos-neg01072015a.lct  
 Processed by : Admin  
 Modified Date : 18/6/2019 4:24:20 PM

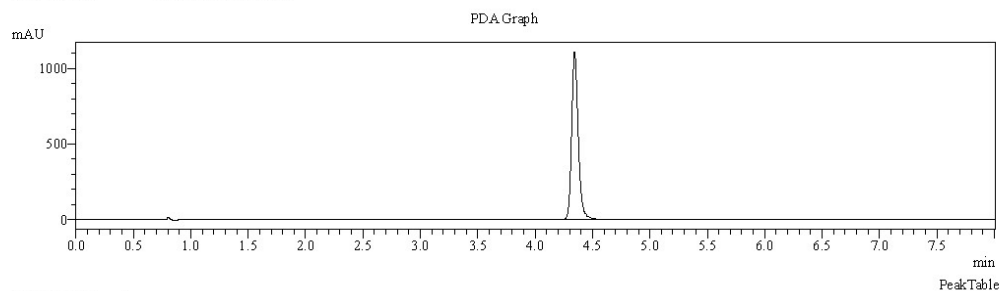

PDA Ch1 254nm 4nm

| Peak# | Name | Ret. Time | Area    | Area%   |
|-------|------|-----------|---------|---------|
| 1     |      | 4.339     | 4313859 | 100.000 |

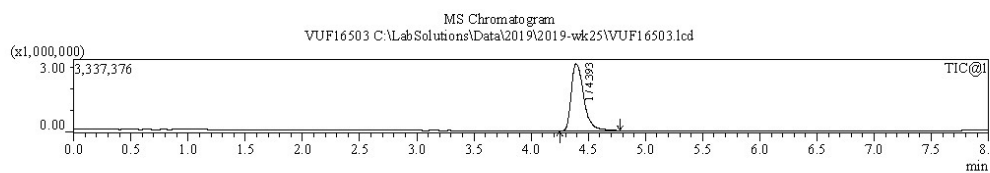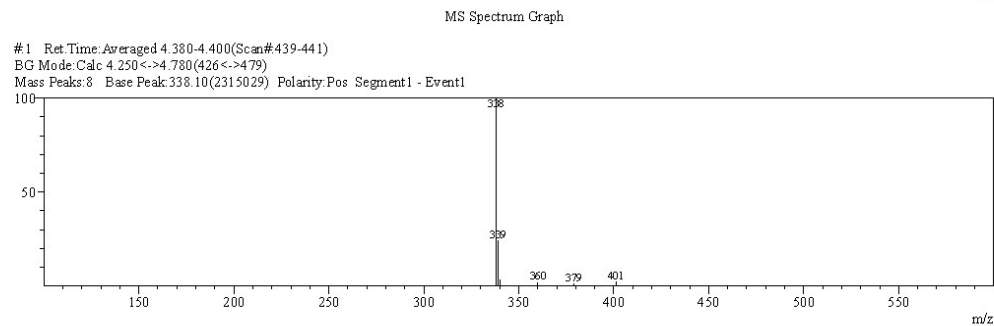

MS Spectrum Table

#1 Ret.Time:  
 BG Mode: Calc 4.250<->4.780(426<->479)  
 Mass Peaks: 8 Base Peak: 338.10(2315029) Polarity: Pos Segment1 - Event1

| # | m/z    | Abs.Inten. | Rel.Inten. | Charge | Polarity | Monoisotopic | # | m/z    | Abs.Inten. | Rel.Inten. | Charge | Polarity | Monoisotopic |
|---|--------|------------|------------|--------|----------|--------------|---|--------|------------|------------|--------|----------|--------------|
| 1 | 338.10 | 2315029    | 100.00     |        |          |              | 5 | 379.15 | 26705      | 1.15       |        |          |              |
| 2 | 339.15 | 558399     | 24.12      |        |          |              | 6 | 401.15 | 51029      | 2.20       |        |          |              |
| 3 | 340.15 | 69830      | 3.02       |        |          |              | 7 | 697.40 | 39606      | 1.71       |        |          |              |
| 4 | 360.05 | 44771      | 1.93       |        |          |              | 8 | 702.95 | 24657      | 1.07       |        |          |              |

Figure S16. LCMS spectrum of compound **8**.



Acquired by : Admin  
 Date Acquired : 5/17/2016 12:43:55 PM  
 Sample Name : YAZH-131  
 Sample ID :  
 Tray# : 1  
 Vial# : 20  
 Injection Volume : 1  
 Data File : C:\LabSolutions\Data\2016 - wk20\YAZH-131.lcd  
 Background File : blanco 17052016.lcd  
 Method File : Method SCAN ACID standard.lcm  
 Report Format : DefaultL.CMS.lcr  
 Tuning File : C:\LabSolutions\Tuning\Tuning-ESI-pos-neg01072015a.lct  
 Processed by : Admin  
 Modified Date : 5/17/2016 2:59:15 PM

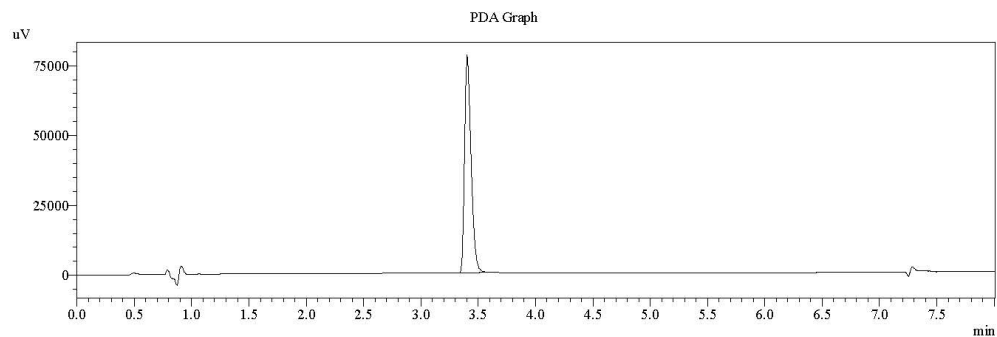

PDA Ch1 254nm 4nm

| Peak# | Name | Ret. Time | Area   | Area%   |
|-------|------|-----------|--------|---------|
| 1     |      | 3.399     | 307369 | 100.000 |

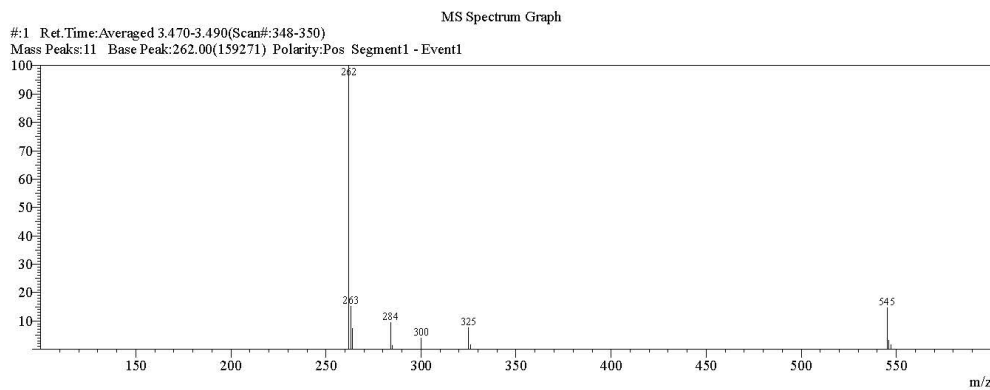

MS Spectrum Table

#1 Ret.Time:  
 BG Mode:Calc 3.370<->3.640(338<->365)

| # | m/z    | Abs.Inten. | Rel.Inten. | Charge | Polarity | Monoisotopic | #  | m/z    | Abs.Inten. | Rel.Inten. | Charge | Polarity | Monoisotopic |
|---|--------|------------|------------|--------|----------|--------------|----|--------|------------|------------|--------|----------|--------------|
| 1 | 262.00 | 159271     | 100.00     |        |          |              | 7  | 325.00 | 12159      | 7.63       |        |          |              |
| 2 | 263.05 | 24117      | 15.14      |        |          |              | 8  | 326.10 | 2444       | 1.53       |        |          |              |
| 3 | 264.00 | 11613      | 7.29       |        |          |              | 9  | 545.05 | 23434      | 14.71      |        |          |              |
| 4 | 283.95 | 15021      | 9.43       |        |          |              | 10 | 546.10 | 5129       | 3.22       |        |          |              |
| 5 | 285.05 | 2316       | 1.45       |        |          |              | 11 | 547.20 | 2335       | 1.47       |        |          |              |
| 6 | 300.05 | 6172       | 3.88       |        |          |              |    |        |            |            |        |          |              |

Figure S19. LCMS spectrum of compound **9**.

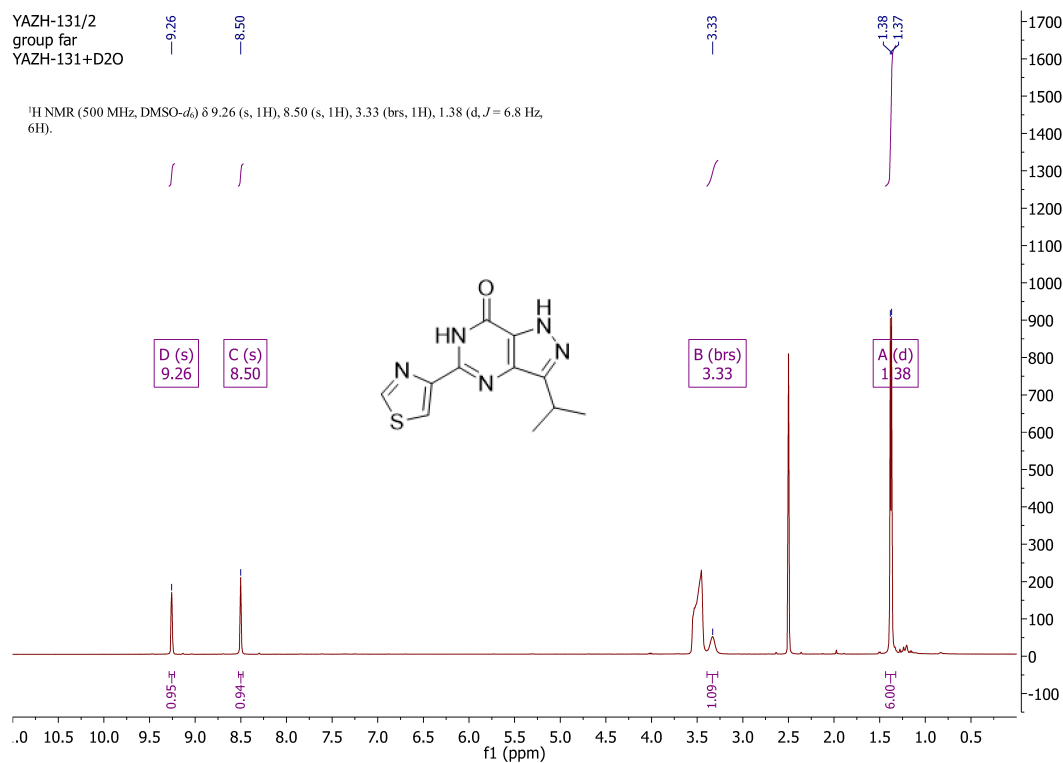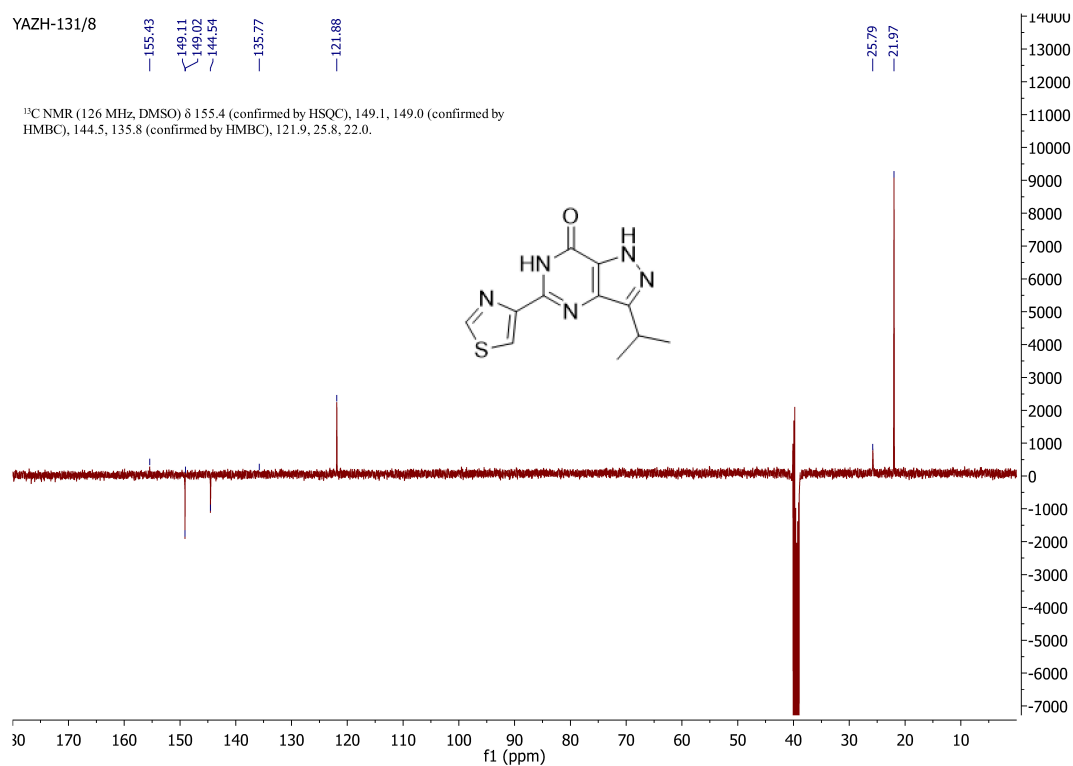

Acquired by : Admin  
 Date Acquired : 4/5/2016 8:23:28 AM  
 Sample Name : YAZH-127-1  
 Sample ID :  
 Tray# : 1  
 Vial# : 33  
 Injection Volume : 1  
 Data File : C:\LabSolutions\Data\2016 - wk18\YAZH-127-1.lcd  
 Background File : blanco04052016.lcd  
 Method File : Method SCAN ACID standard.lcm  
 Report Format : DefaultLCMS.lcr  
 Tuning File : C:\LabSolutions\Tuning\Tuning-ESI-pos-neg01072015a.lct  
 Processed by : Admin  
 Modified Date : 17/11/2020 2:46:39 PM

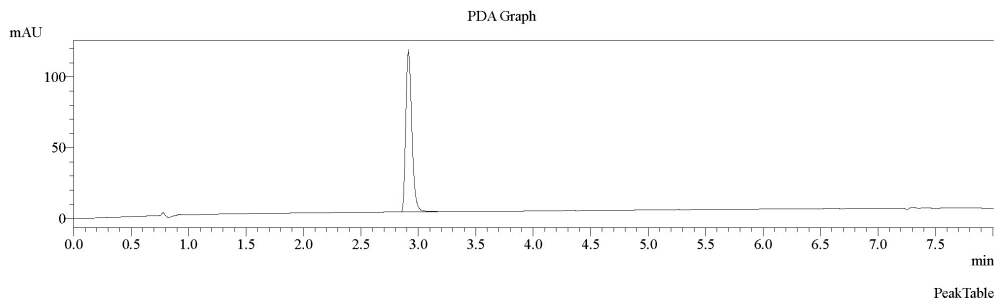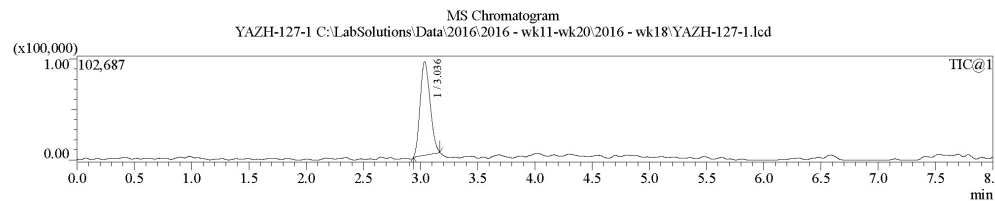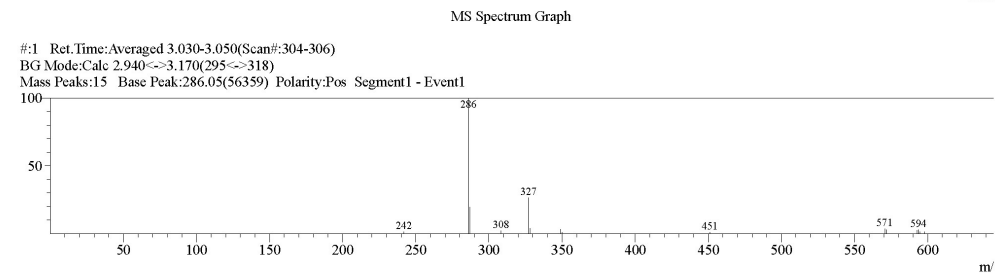

MS Spectrum Table

#1 Ret.Time:  
 BG Mode:Calc 2.940<->3.170(295<->318)  
 Mass Peaks:15 Base Peak:286.05(56359) Polarity:Pos Segment1 - Event1

| # | m/z    | Abs.Inten. | Rel.Inten. | Charge | Polarity | Monoisotopic | #  | m/z    | Abs.Inten. | Rel.Inten. | Charge | Polarity | Monoisotopic |
|---|--------|------------|------------|--------|----------|--------------|----|--------|------------|------------|--------|----------|--------------|
| 1 | 241.90 | 759        | 1.35       |        |          |              | 9  | 451.00 | 731        | 1.30       |        |          |              |
| 2 | 286.05 | 56359      | 100.00     |        |          |              | 10 | 570.70 | 1990       | 3.53       |        |          |              |
| 3 | 287.15 | 11052      | 19.61      |        |          |              | 11 | 571.70 | 1742       | 3.09       |        |          |              |
| 4 | 308.25 | 1162       | 2.06       |        |          |              | 12 | 592.70 | 1462       | 2.59       |        |          |              |
| 5 | 327.05 | 14987      | 26.59      |        |          |              | 13 | 593.70 | 1612       | 2.86       |        |          |              |
| 6 | 328.10 | 2223       | 3.94       |        |          |              | 14 | 594.65 | 771        | 1.37       |        |          |              |
| 7 | 349.10 | 1884       | 3.34       |        |          |              | 15 | 597.70 | 810        | 1.44       |        |          |              |
| 8 | 350.10 | 731        | 1.30       |        |          |              |    |        |            |            |        |          |              |

Figure S22. LCMS spectrum of compound **10**.

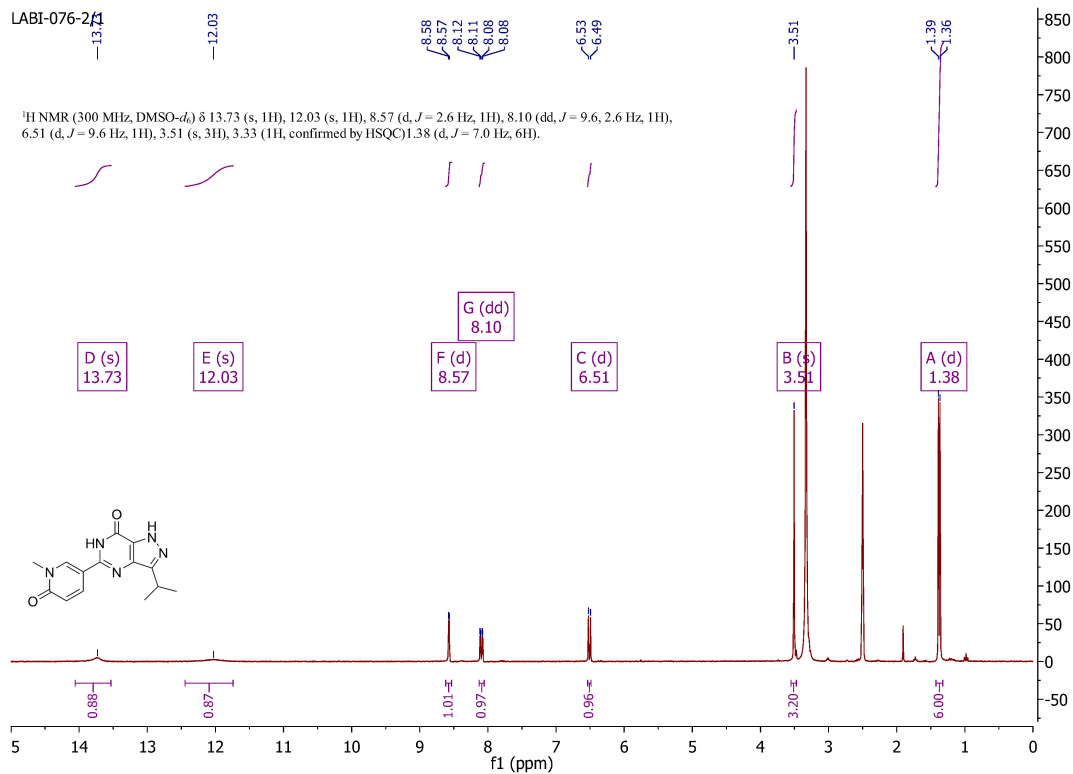

Figure S23. <sup>1</sup>H NMR spectrum of compound **10**.

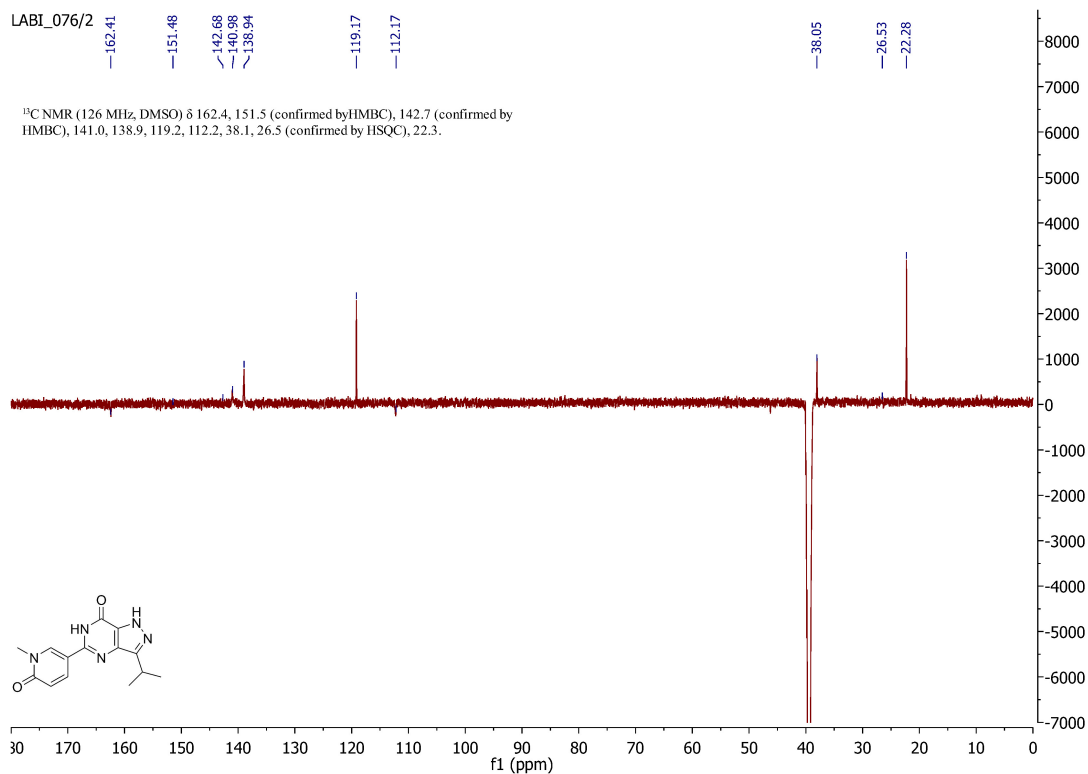

Figure 24. <sup>13</sup>C NMR spectrum of compound **10**.



Acquired by : Admin  
 Date Acquired : 5/13/2016 6:30:07 PM  
 Sample Name : YAZH-124  
 Sample ID :  
 Tray# : 1  
 Vial# : 30  
 Injection Volume : 1  
 Data File : C:\LabSolutions\Data\2016 - wk19\YAZH-124.lcd  
 Background File : blanco 13052016.lcd  
 Method File : Method SCAN ACID standard.lcm  
 Report Format : DefaultL.CMS.lcr  
 Tuning File : C:\LabSolutions\Tuning\Tuning-ESI-pos-neg01072015a.lct  
 Processed by : Admin  
 Modified Date : 5/17/2016 8:53:23 AM

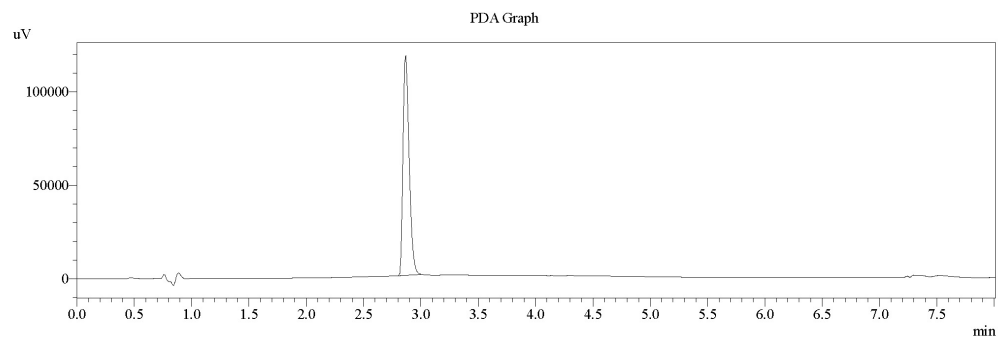

PDA Ch1 254nm 4nm

| Peak# | Name | Ret. Time | Area   | Area %  |
|-------|------|-----------|--------|---------|
| 1     |      | 2.861     | 435212 | 100.000 |

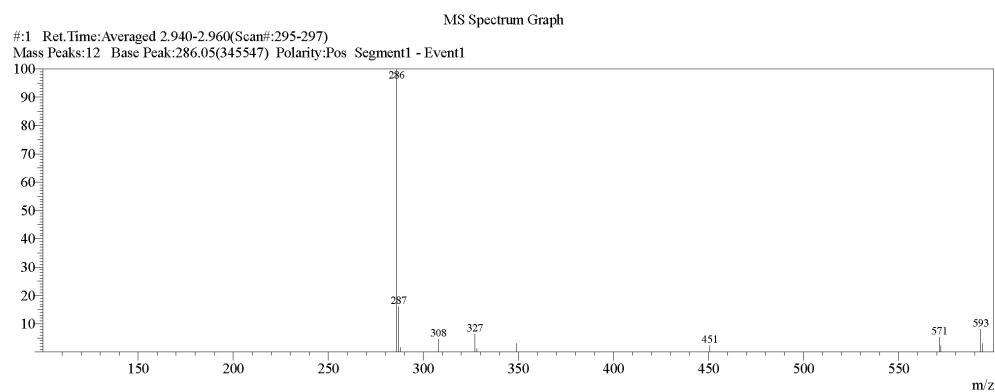

MS Spectrum Table

#1 Ret.Time:  
 BG Mode:Calc 2.840<->3.140(285<->315)  
 Mass Peaks:12 Base Peak:286.05(345547) Polarity:Pos Segment1 - Event1

| # | m/z    | Abs.Inten. | Rel.Inten. | Charge | Polarity | Monoisotopic | #  | m/z    | Abs.Inten. | Rel.Inten. | Charge | Polarity | Monoisotopic |
|---|--------|------------|------------|--------|----------|--------------|----|--------|------------|------------|--------|----------|--------------|
| 1 | 286.05 | 345547     | 100.00     |        |          |              | 7  | 349.10 | 10212      | 2.96       |        |          |              |
| 2 | 287.05 | 55580      | 16.08      |        |          |              | 8  | 450.65 | 8293       | 2.40       |        |          |              |
| 3 | 288.05 | 5645       | 1.63       |        |          |              | 9  | 571.30 | 18483      | 5.35       |        |          |              |
| 4 | 308.00 | 15951      | 4.62       |        |          |              | 10 | 572.25 | 8141       | 2.36       |        |          |              |
| 5 | 327.10 | 22082      | 6.39       |        |          |              | 11 | 593.20 | 27933      | 8.08       |        |          |              |
| 6 | 328.05 | 4597       | 1.33       |        |          |              | 12 | 594.15 | 10147      | 2.94       |        |          |              |

Figure S25. LCMS spectrum of compound **11**.

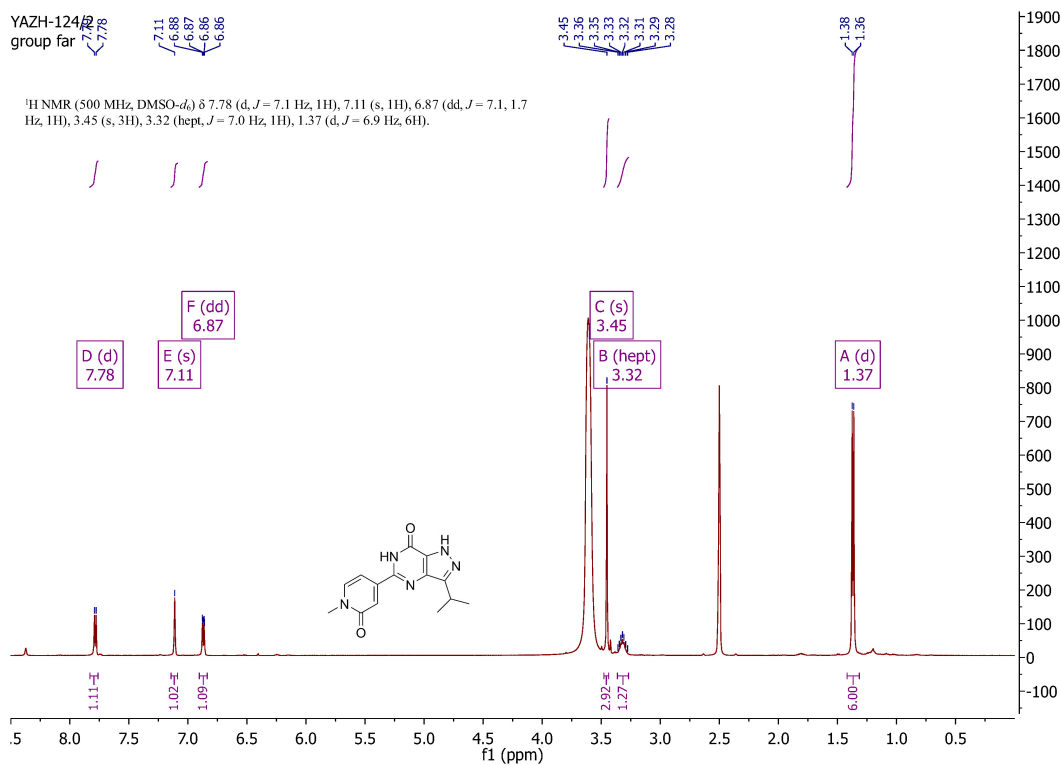

Figure S26. <sup>1</sup>H NMR spectrum of compound **11**.

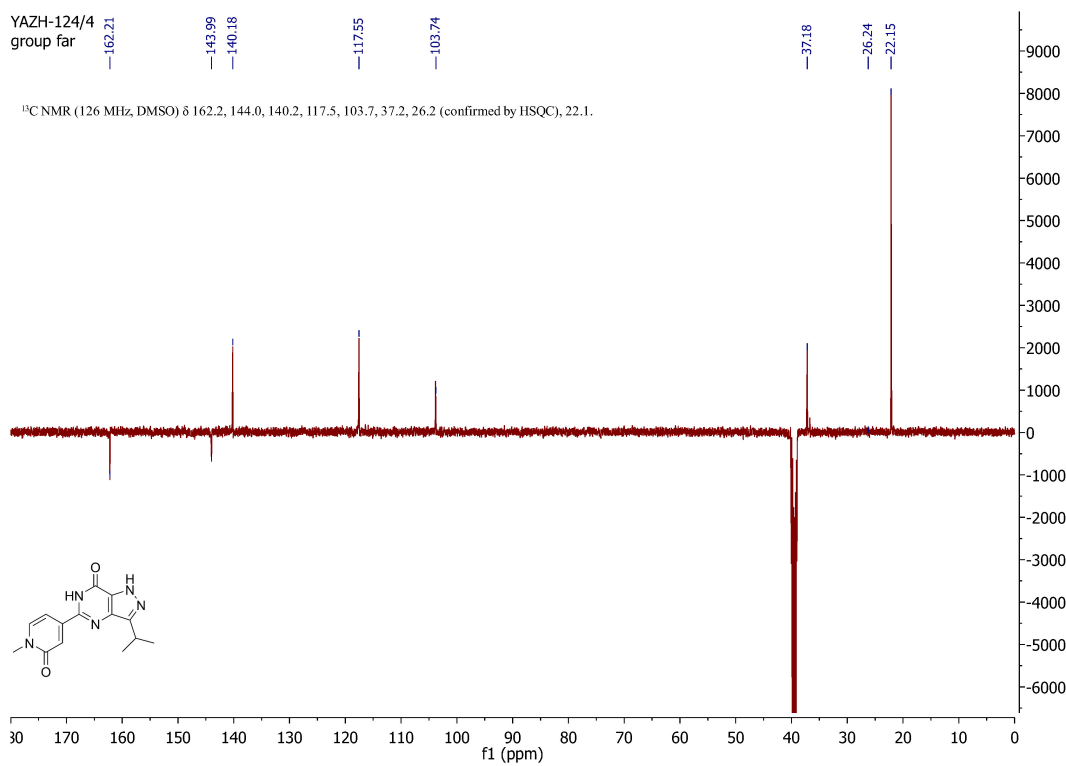

Figure S27. <sup>13</sup>C NMR spectrum of compound **11**.

Acquired by : Admin  
 Date Acquired : 13/12/2017 1:15:35 PM  
 Sample Name : YAZH01-177-2  
 Sample ID :  
 Tray# : 1  
 Vial# : 14  
 Injection Volume : 3  
 Data File : C:\LabSolutions\Data\2017\2017-wk50\YAZH01-177-2.lcd  
 Background File : blanco 13122017.lcd  
 Method File : Method SCAN ACID standard1cm  
 Report Format : DefaultLCMS1cr  
 Tuning File : C:\LabSolutions\Tuning\Tuning-ESI-pos-neg01072015a1ct  
 Processed by : Admin  
 Modified Date : 13/12/2017 3:51:59 PM

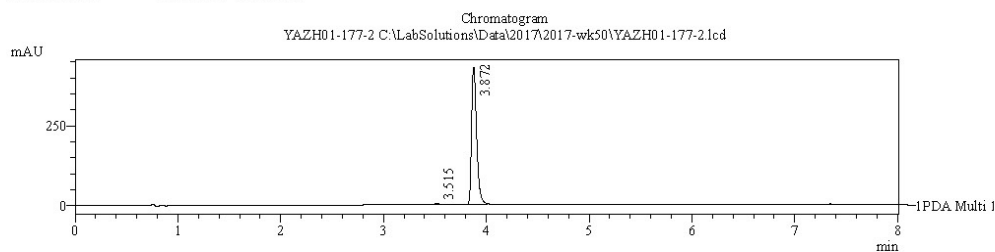

| Peak# | Name | Ret. Time | Area    | Area%  |
|-------|------|-----------|---------|--------|
| 1     |      | 3.515     | 10088   | 0.690  |
| 2     |      | 3.872     | 1451224 | 99.310 |

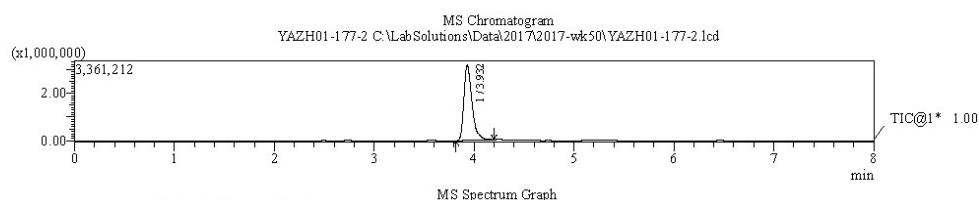

MS Spectrum Graph

#1 RetTime:Averaged 3.920-3.940(Scan#393-395)

Mass Peaks:9 Base Peak:283.10(2292484) Polarity:Pos Segment1 - Event1

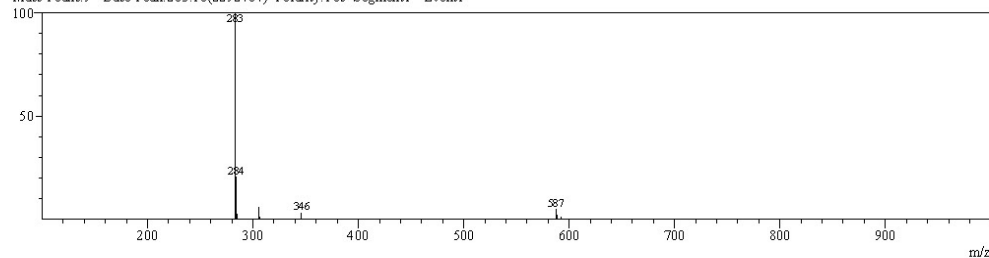

MS Spectrum Table

#1 RetTime:

BG Mode:Calc 3.820<->4.200(383<->421)

Mass Peaks:9 Base Peak:283.10(2292484) Polarity:Pos Segment1 - Event1

| # | m/z    | Abs.Inten. | Rel.Inten. | Charge | Polarity | Monoisotopic | # | m/z    | Abs.Inten. | Rel.Inten. | Charge | Polarity | Monoisotopic |
|---|--------|------------|------------|--------|----------|--------------|---|--------|------------|------------|--------|----------|--------------|
| 1 | 283.10 | 2292484    | 100.00     |        |          |              | 6 | 346.15 | 72424      | 3.16       |        |          |              |
| 2 | 284.10 | 466861     | 20.36      |        |          |              | 7 | 587.30 | 112077     | 4.89       |        |          |              |
| 3 | 285.15 | 56524      | 2.47       |        |          |              | 8 | 588.30 | 42963      | 1.87       |        |          |              |
| 4 | 305.10 | 128110     | 5.59       |        |          |              | 9 | 592.40 | 30587      | 1.33       |        |          |              |
| 5 | 306.10 | 23597      | 1.03       |        |          |              |   |        |            |            |        |          |              |

Figure S28. LCMS spectrum of compound 12.

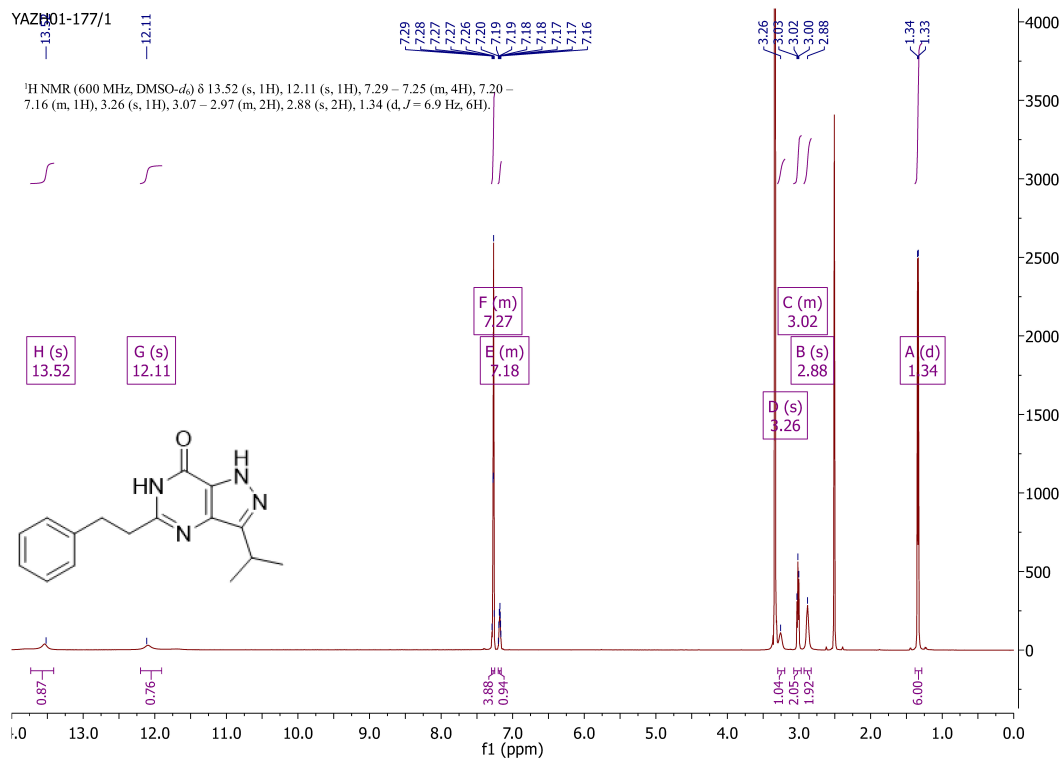

Figure S29. <sup>1</sup>H NMR spectrum of compound **12**.

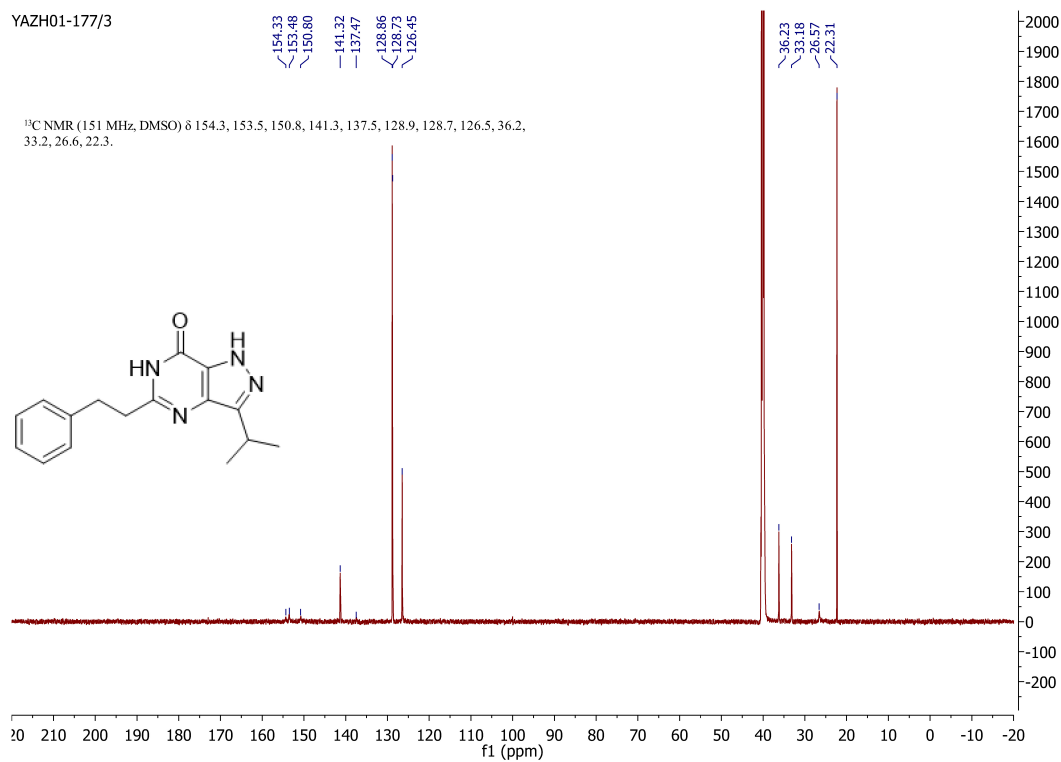

Figure S30. <sup>13</sup>C NMR spectrum of compound **12**.

Acquired by : Admin  
 Date Acquired : 4/28/2016 1:32:12 PM  
 Sample Name : YAZH-126-3  
 Sample ID :  
 Tray# : 1  
 Vial# : 24  
 Injection Volume : 1  
 Data File : C:\LabSolutions\Data\2016 - wk17\YAZH-126-3.lcd  
 Background File : Blanco28042016.lcd  
 Method File : Method SCAN ACID standard.lcm  
 Report Format : Default1.CMS.lcr  
 Tuning File : C:\LabSolutions\Tuning\Tuning-ESI-pos-neg01072015a.lct  
 Processed by : Admin  
 Modified Date : 4/28/2016 1:48:32 PM

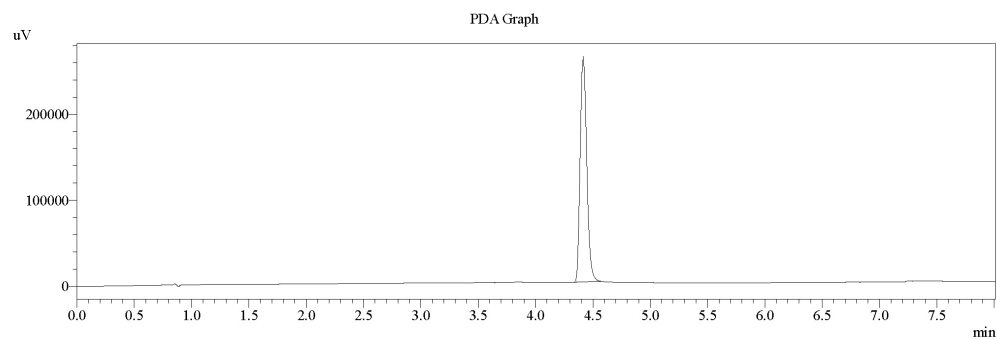

| Peak# | Name | Ret. Time | Area    | Area %  |
|-------|------|-----------|---------|---------|
| 1     |      | 4.410     | 1049413 | 100.000 |

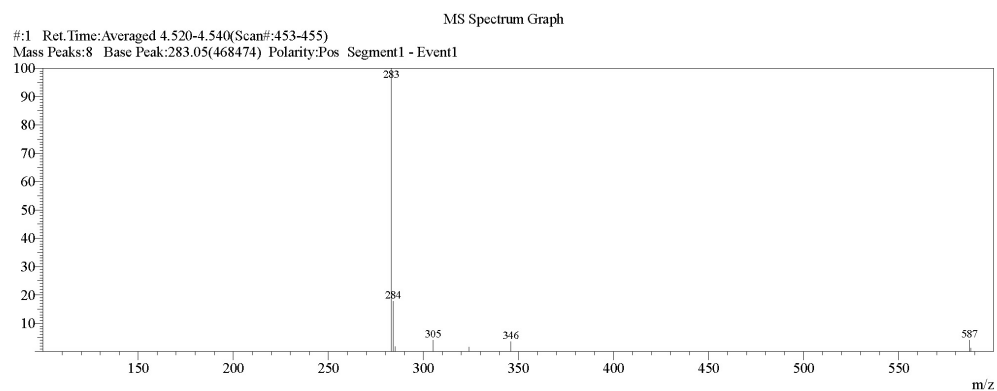

MS Spectrum Table

#1 Ret.Time:  
 BG Mode:Calc 4.400<->4.720(441<->473)  
 Mass Peaks:8 Base Peak:283.05(468474) Polarity:Pos Segment1 - Event1

| # | m/z    | Abs.Inten. | Rel.Inten. | Charge | Polarity | Monoisotopic | # | m/z    | Abs.Inten. | Rel.Inten. | Charge | Polarity | Monoisotopic |
|---|--------|------------|------------|--------|----------|--------------|---|--------|------------|------------|--------|----------|--------------|
| 1 | 283.05 | 468474     | 100.00     |        |          |              | 5 | 324.10 | 7405       | 1.58       |        |          |              |
| 2 | 284.15 | 83666      | 17.86      |        |          |              | 6 | 346.10 | 16760      | 3.58       |        |          |              |
| 3 | 285.10 | 8605       | 1.84       |        |          |              | 7 | 587.25 | 19220      | 4.10       |        |          |              |
| 4 | 305.10 | 19181      | 4.09       |        |          |              | 8 | 588.10 | 6105       | 1.30       |        |          |              |

Figure S31. LCMS spectrum of compound **13**.

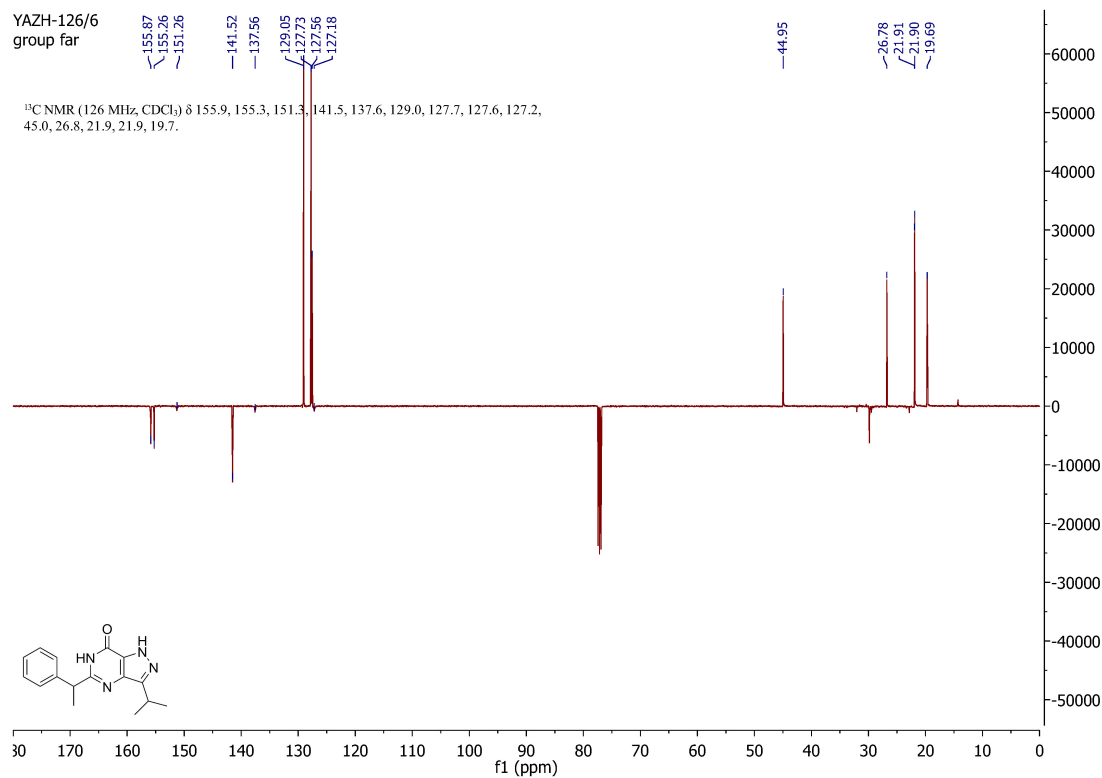

Figure S32. <sup>1</sup>H NMR spectrum of compound **13**.

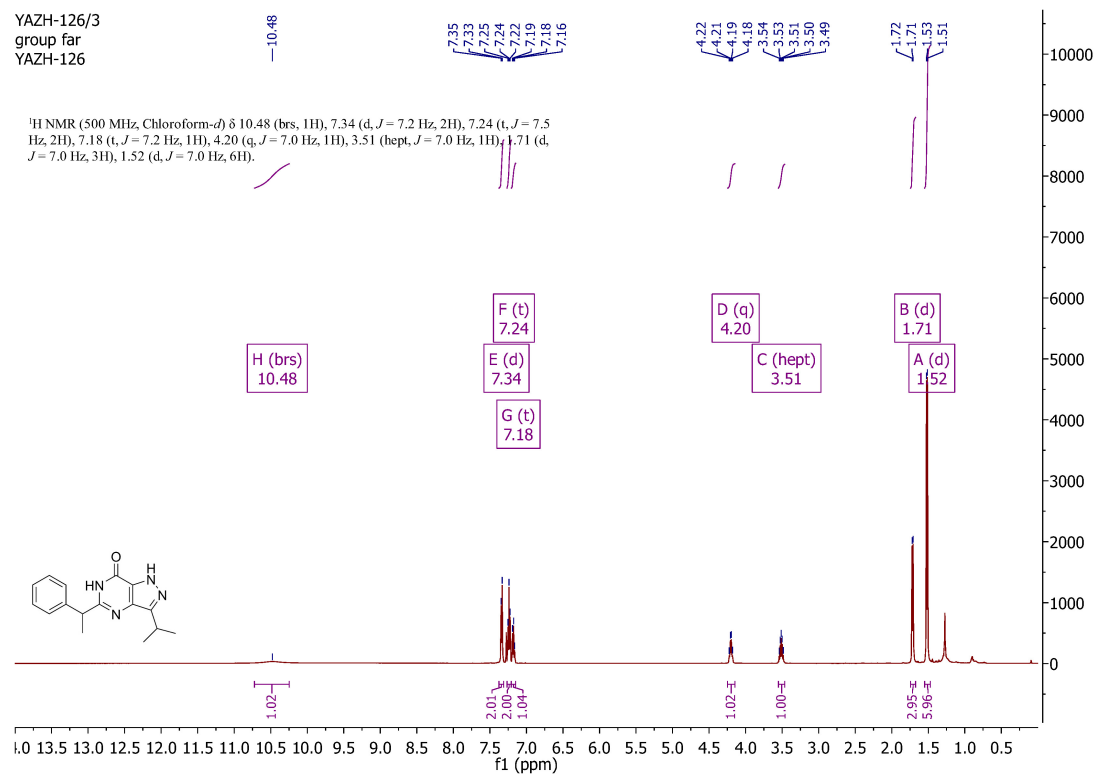

Figure S33. <sup>13</sup>C NMR spectrum of compound **13**.

Acquired by : Admin  
 Date Acquired : 16/7/2019 11:46:50 AM  
 Sample Name : MOIB\_38\_final  
 Sample ID :  
 Tray# : 1  
 Vial# : 22  
 Injection Volume : 1  
 Data File : C:\LabSolutions\Data\2019\2019-wk29\MOIB\_38\_final.lcd  
 Background File : blanco 16072019.lcd  
 Method File : Method SCAN ACID standard.lcm  
 Report Format : DefaultLCMS.lcr  
 Tuning File : C:\LabSolutions\Tuning\Tuning-ESI-pos-neg01072015a.lct  
 Processed by : Admin  
 Modified Date : 16/7/2019 12:01:13 PM

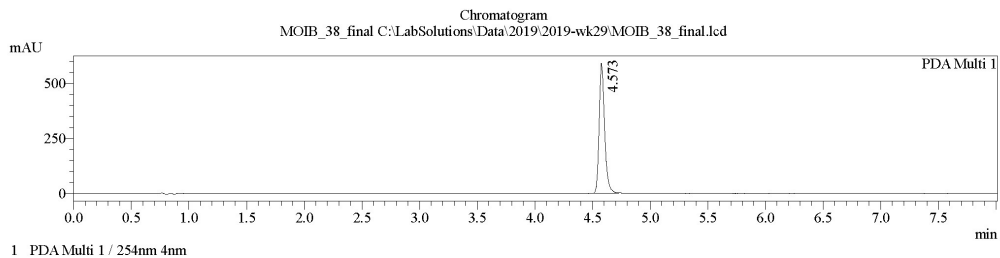

PeakTabl

| Peak# | Name | Ret. Time | Area    | Area %  |
|-------|------|-----------|---------|---------|
| 1     |      | 4.573     | 1918219 | 100.000 |

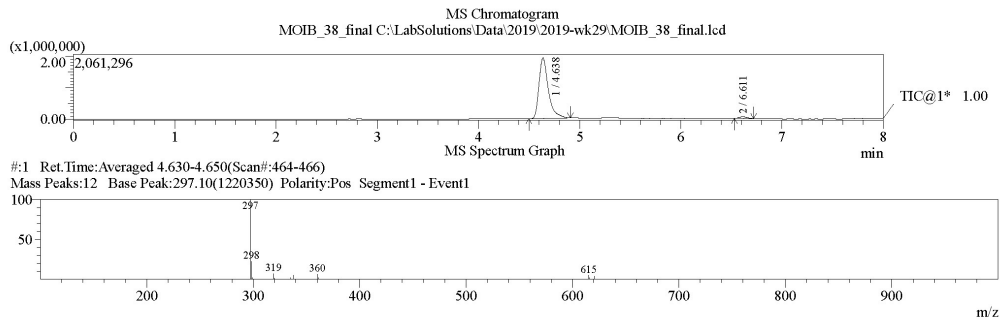

MS Spectrum Table

| # | m/z    | Abs.Inten. | Rel.Inten. | Charge | Polarity | Monoisotopic | #  | m/z    | Abs.Inten. | Rel.Inten. | Charge | Polarity | Monoisotopic |
|---|--------|------------|------------|--------|----------|--------------|----|--------|------------|------------|--------|----------|--------------|
| 1 | 297.10 | 1220350    | 100.00     |        |          |              | 7  | 338.10 | 63806      | 5.23       |        |          |              |
| 2 | 298.10 | 273031     | 22.37      |        |          |              | 8  | 360.10 | 81633      | 6.69       |        |          |              |
| 3 | 299.10 | 26922      | 2.21       |        |          |              | 9  | 361.15 | 22098      | 1.81       |        |          |              |
| 4 | 319.10 | 85305      | 6.99       |        |          |              | 10 | 615.30 | 59689      | 4.89       |        |          |              |
| 5 | 320.10 | 18541      | 1.52       |        |          |              | 11 | 616.30 | 24305      | 1.99       |        |          |              |
| 6 | 335.05 | 22825      | 1.87       |        |          |              | 12 | 620.50 | 44655      | 3.66       |        |          |              |

Figure S34. LCMS spectrum of compound **14**.

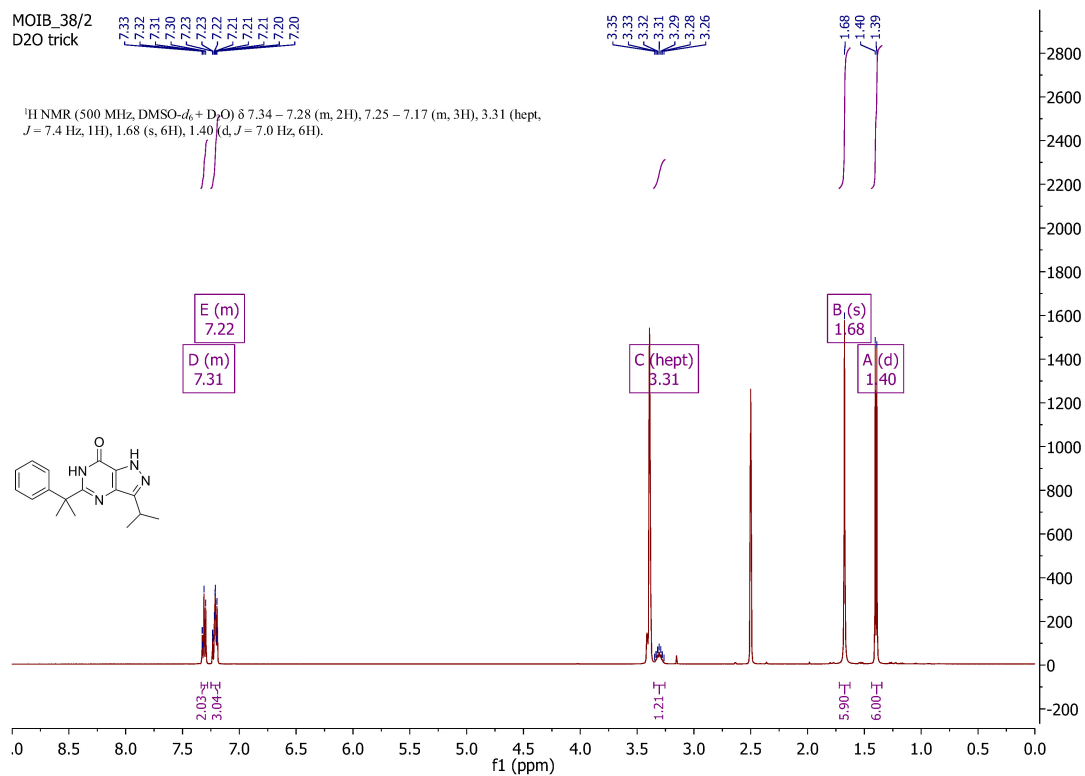

Figure S35. <sup>1</sup>H NMR spectrum of compound **14**.

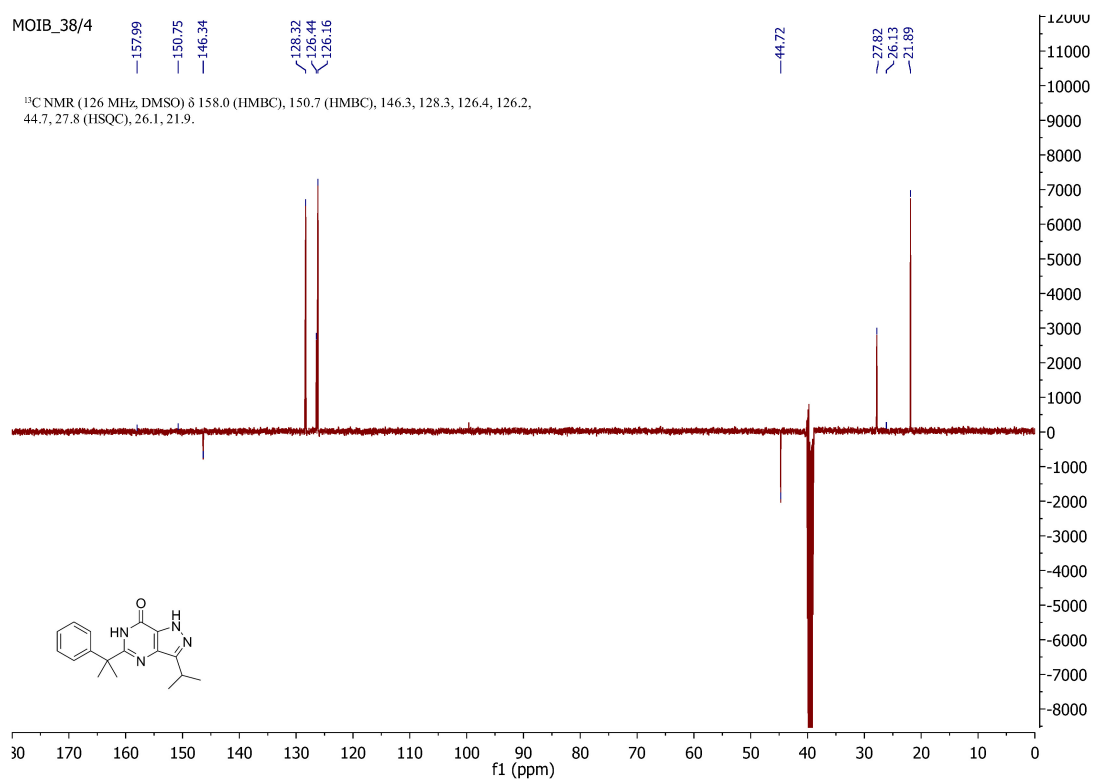

Figure S36. <sup>13</sup>C NMR spectrum of compound **14**.



Acquired by : Admin  
Date Acquired : 16/7/2019 11:55:25 AM  
Sample Name : MOIB\_39\_final  
Sample ID :  
Tray# : 1  
Vial# : 23  
Injection Volume : 1  
Data File : C:\LabSolutions\Data\2019\2019-wk29\MOIB\_39\_final.lcd  
Background File : blanco 16072019.lcd  
Method File : Method SCAN ACID standard.lcm  
Report Format : DefaultLCMS.lcr  
Tuning File : C:\LabSolutions\Tuning\Tuning-ESI-pos-neg01072015a.lct  
Processed by : Admin  
Modified Date : 16/7/2019 12:04:00 PM

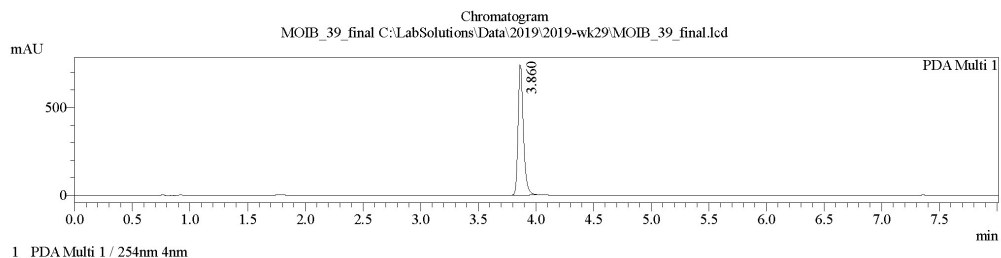

PeakTabl

| PDA Ch1 254nm 4nm |      |           |         |         |
|-------------------|------|-----------|---------|---------|
| Peak#             | Name | Ret. Time | Area    | Area %  |
| 1                 |      | 3.860     | 2365954 | 100.000 |

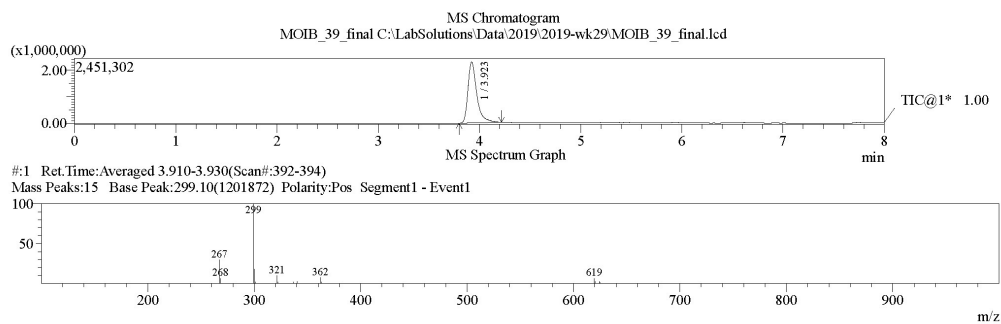

MS Spectrum Table

#1 Ret.Time:  
BG Mode:Calc 3.800<>4.220(381<>423)

| # | m/z    | Abs.Inten. | Rel.Inten. | Charge | Polarity | Monoisotopic | #  | m/z    | Abs.Inten. | Rel.Inten. | Charge | Polarity | Monoisotopic |
|---|--------|------------|------------|--------|----------|--------------|----|--------|------------|------------|--------|----------|--------------|
| 1 | 267.05 | 356809     | 29.69      |        |          |              | 9  | 340.05 | 31975      | 2.66       |        |          |              |
| 2 | 268.05 | 77318      | 6.43       |        |          |              | 10 | 362.10 | 89695      | 7.46       |        |          |              |
| 3 | 299.10 | 1201872    | 100.00     |        |          |              | 11 | 363.15 | 21610      | 1.80       |        |          |              |
| 4 | 300.05 | 219603     | 18.27      |        |          |              | 12 | 619.30 | 78602      | 6.54       |        |          |              |
| 5 | 301.05 | 23930      | 1.99       |        |          |              | 13 | 620.30 | 32324      | 2.69       |        |          |              |
| 6 | 321.05 | 118849     | 9.89       |        |          |              | 14 | 624.30 | 29045      | 2.42       |        |          |              |
| 7 | 322.10 | 25171      | 2.09       |        |          |              | 15 | 625.05 | 17260      | 1.44       |        |          |              |
| 8 | 337.00 | 27554      | 2.29       |        |          |              |    |        |            |            |        |          |              |

Figure S37. LCMS spectrum of compound 15.

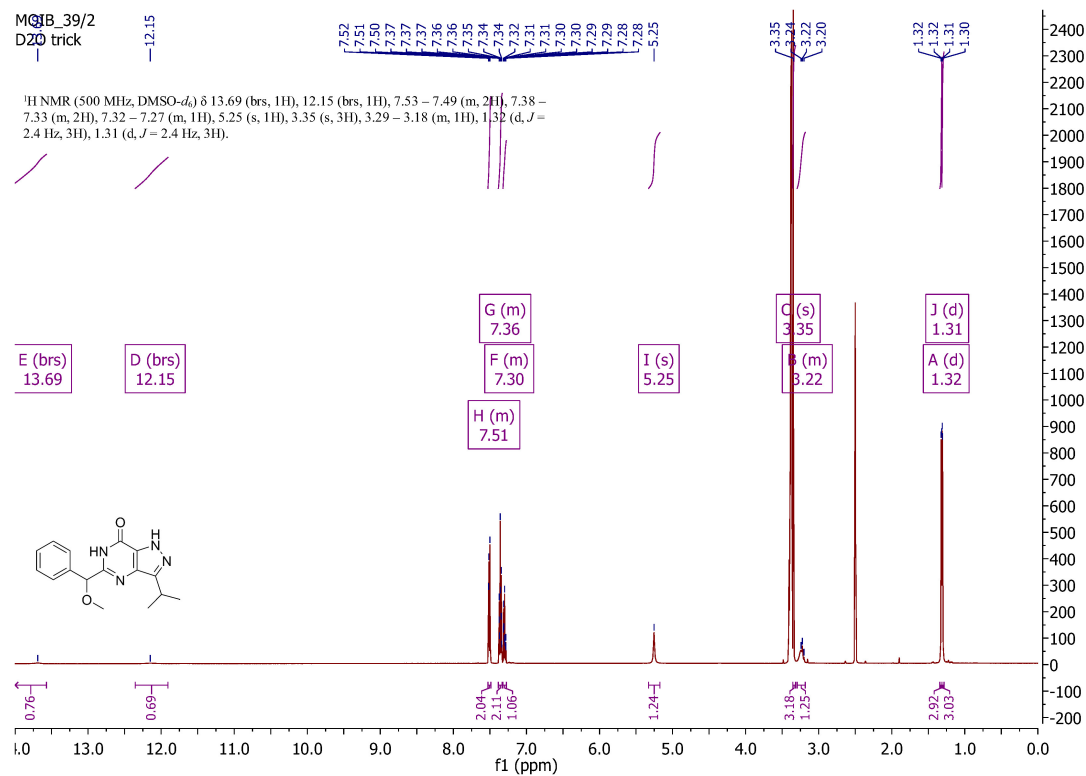

Figure S38. <sup>1</sup>H NMR spectrum of compound 15.

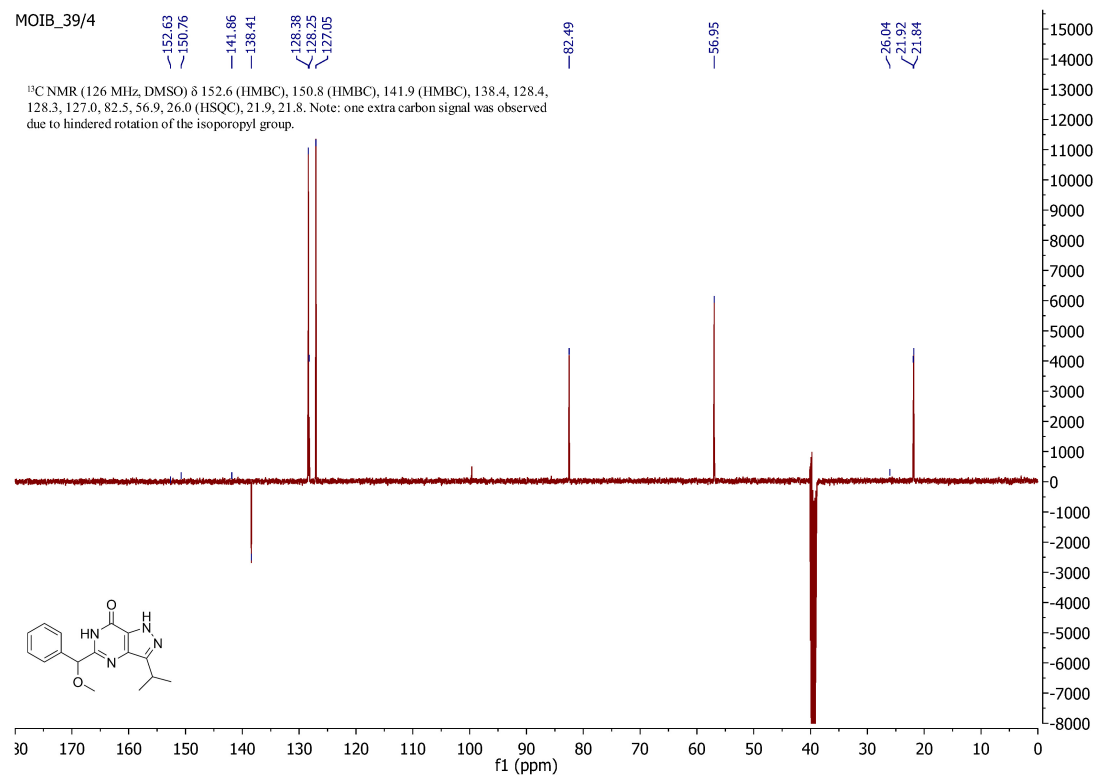

Figure S39. <sup>13</sup>C NMR spectrum of compound 15.

Acquired by : Admin  
 Date Acquired : 18/7/2019 11:50:40 AM  
 Sample Name : MOIB\_41\_final  
 Sample ID :  
 Tray# : 1  
 Vial# : 23  
 Injection Volume : 1  
 Data File : C:\LabSolutions\Data\2019\2019-wk29\MOIB\_41\_final.lcd  
 Background File : blanco 18072019.lcd  
 Method File : Method SCAN.ACID standard.lcm  
 Report Format : DefaultLCMS.lcr  
 Tuning File : C:\LabSolutions\Tuning\Tuning-ESI-pos-neg01072015a.lct  
 Processed by : Admin  
 Modified Date : 18/7/2019 12:02:44 PM

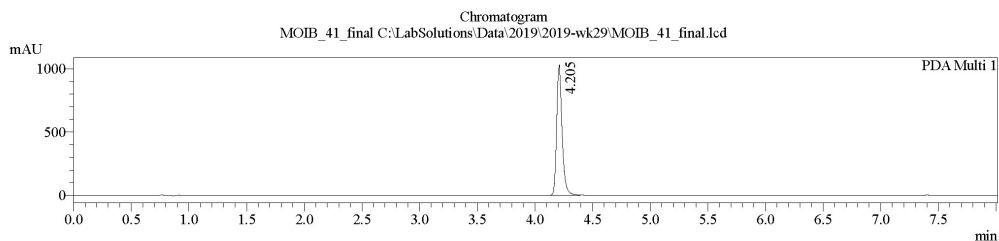

1 PDA Multi 1 / 254nm 4nm

PeakTab1

| Peak# | Name | Ret. Time | Area    | Area %  |
|-------|------|-----------|---------|---------|
| 1     |      | 4.205     | 3333249 | 100.000 |

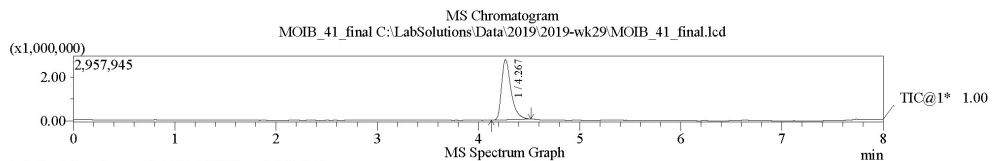

#1 Ret.Time:Averaged 4.260-4.280(Scan#:427-429)  
Mass Peaks:13 Base Peak:295.05(1742339) Polarity:Pos Segment1 - Event1

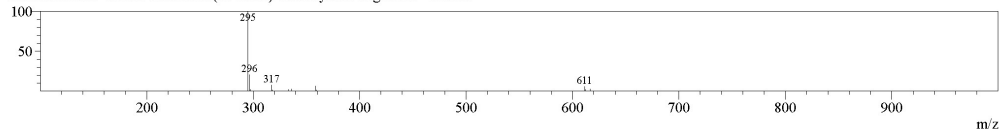

MS Spectrum Table

#1 Ret.Time:  
BG Mode:Calc 4.130<->4.520(414<->453)

| # | m/z    | Abs.Inten. | Rel.Inten. | Charge | Polarity | Monoisotopic | #  | m/z    | Abs.Inten. | Rel.Inten. | Charge | Polarity | Monoisotopic |
|---|--------|------------|------------|--------|----------|--------------|----|--------|------------|------------|--------|----------|--------------|
| 1 | 295.05 | 1742339    | 100.00     |        |          |              | 8  | 358.10 | 114949     | 6.60       |        |          |              |
| 2 | 296.05 | 356374     | 20.45      |        |          |              | 9  | 359.10 | 29632      | 1.70       |        |          |              |
| 3 | 297.15 | 36443      | 2.09       |        |          |              | 10 | 611.30 | 101962     | 5.85       |        |          |              |
| 4 | 317.10 | 131141     | 7.53       |        |          |              | 11 | 612.30 | 34432      | 1.98       |        |          |              |
| 5 | 318.10 | 25143      | 1.44       |        |          |              | 12 | 616.35 | 26907      | 1.54       |        |          |              |
| 6 | 333.05 | 37533      | 2.15       |        |          |              | 13 | 616.65 | 51510      | 2.96       |        |          |              |
| 7 | 336.15 | 44123      | 2.53       |        |          |              |    |        |            |            |        |          |              |

Figure S40. LCMS spectrum of compound **16**.

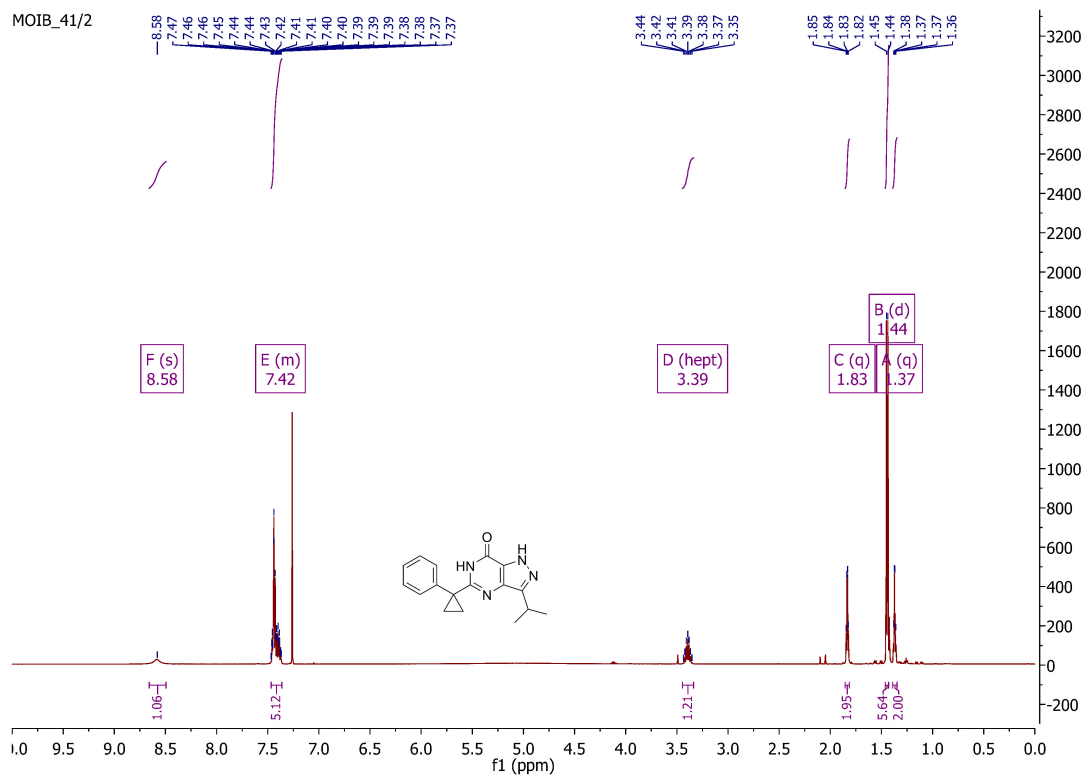

Figure S41.  $^1\text{H}$  NMR spectrum of compound **16**.

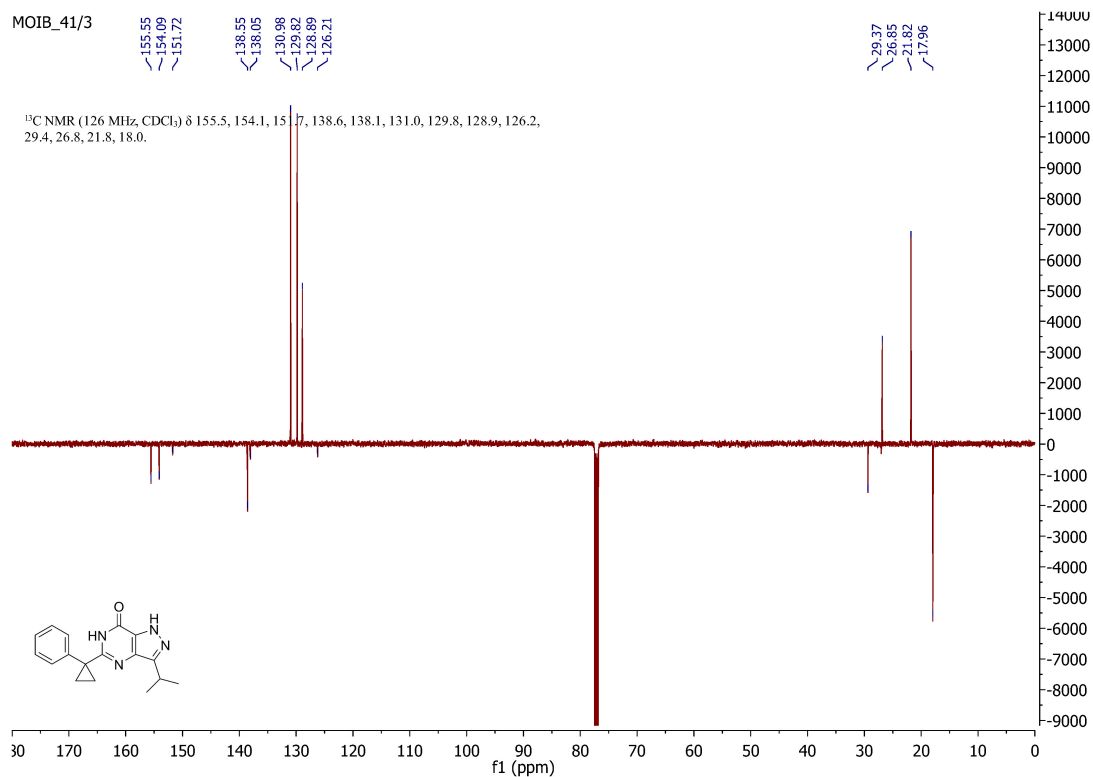

Figure S42.  $^{13}\text{C}$  NMR spectrum of compound **16**.

Acquired by : Admin  
 Date Acquired : 18/7/2019 11:59:17 AM  
 Sample Name : MOIB\_42\_final  
 Sample ID :  
 Tray# : 1  
 Vial# : 24  
 Injection Volume : 1  
 Data File : C:\LabSolutions\Data\2019\2019-wk29\MOIB\_42\_final.lcd  
 Background File : blanco 18072019.lcd  
 Method File : Method SCAN.ACID standard.lcm  
 Report Format : DefaultLCMS.lcr  
 Tuning File : C:\LabSolutions\Tuning\Tuning-ESI-pos-neg01072015a.lct  
 Processed by : Admin  
 Modified Date : 18/7/2019 12:24:07 PM

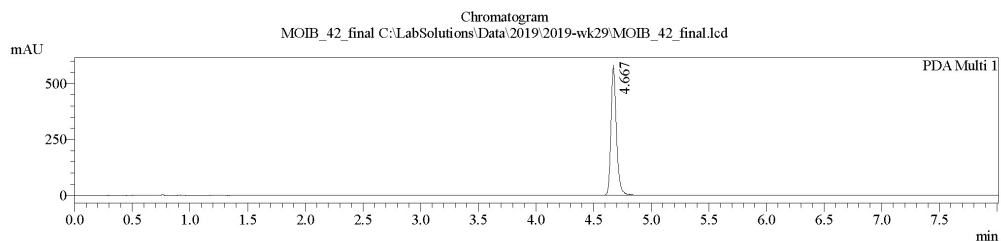

1 PDA Multi 1 / 254nm 4nm

Peak Tabl

| Peak# | Name | Ret. Time | Area    | Area %  |
|-------|------|-----------|---------|---------|
| 1     |      | 4.667     | 1918948 | 100.000 |

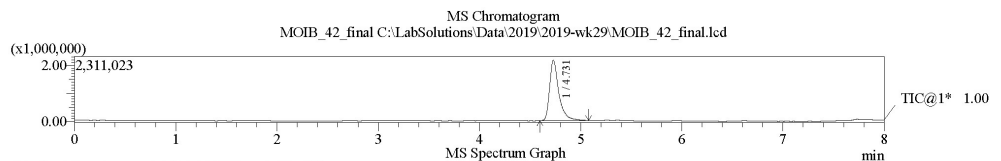

#1 Ret.Time:Averaged 4.720-4.740(Scan#:473-475)  
 Mass Peaks:14 Base Peak:309.10(1295831) Polarity:Pos Segment1 - Event1

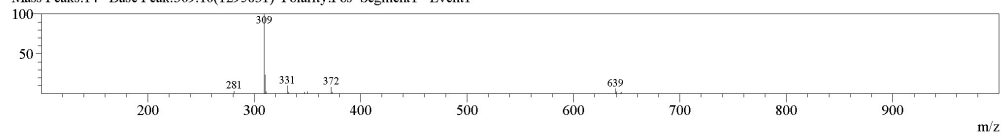

MS Spectrum Table

#1 Ret.Time:  
 BG Mode:Calc 4.600<->5.080(461<->509)

| # | m/z    | Abs.Inten. | Rel.Inten. | Charge | Polarity | Monoisotopic | #  | m/z    | Abs.Inten. | Rel.Inten. | Charge | Polarity | Monoisotopic |
|---|--------|------------|------------|--------|----------|--------------|----|--------|------------|------------|--------|----------|--------------|
| 1 | 281.05 | 41089      | 3.17       |        |          |              | 8  | 350.10 | 38187      | 2.95       |        |          |              |
| 2 | 309.10 | 1295831    | 100.00     |        |          |              | 9  | 372.10 | 110924     | 8.56       |        |          |              |
| 3 | 310.10 | 305657     | 23.59      |        |          |              | 10 | 373.10 | 26340      | 2.03       |        |          |              |
| 4 | 311.05 | 32641      | 2.52       |        |          |              | 11 | 639.30 | 79877      | 6.16       |        |          |              |
| 5 | 331.10 | 128965     | 9.95       |        |          |              | 12 | 640.30 | 34150      | 2.64       |        |          |              |
| 6 | 332.10 | 25155      | 1.94       |        |          |              | 13 | 644.55 | 14402      | 1.11       |        |          |              |
| 7 | 347.10 | 30358      | 2.34       |        |          |              | 14 | 644.60 | 30521      | 2.36       |        |          |              |

Figure S43. LCMS spectrum of compound **17**.

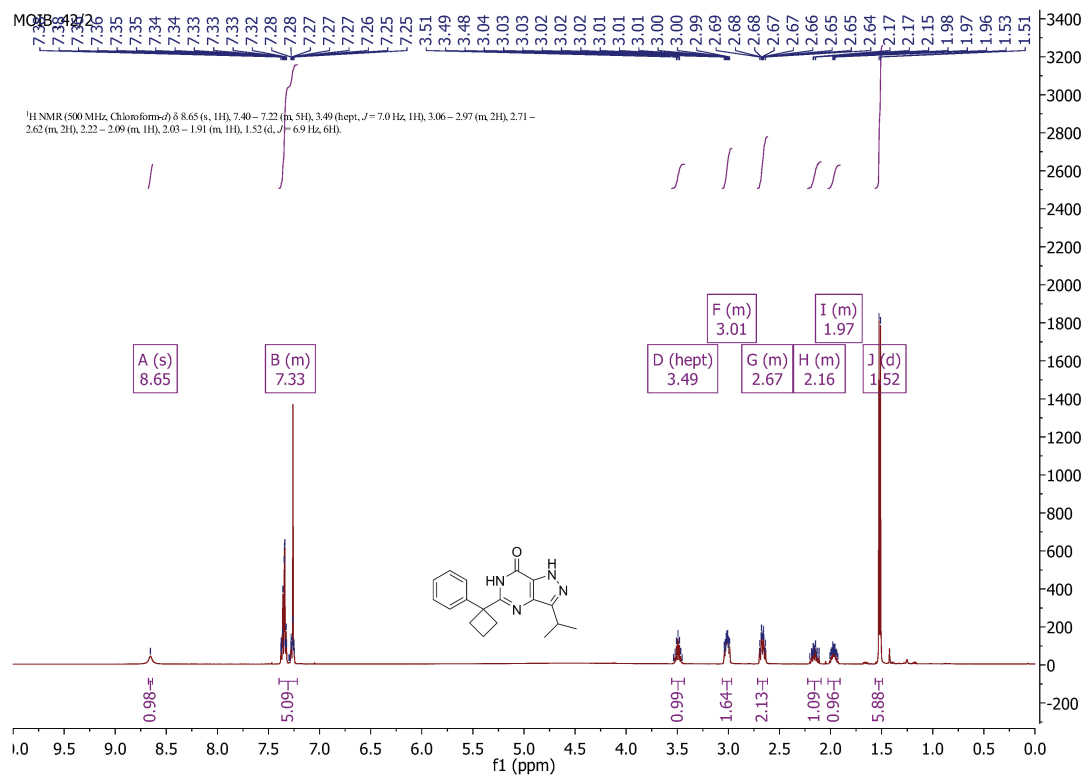

Figure S44. <sup>1</sup>H NMR spectrum of compound **17**.

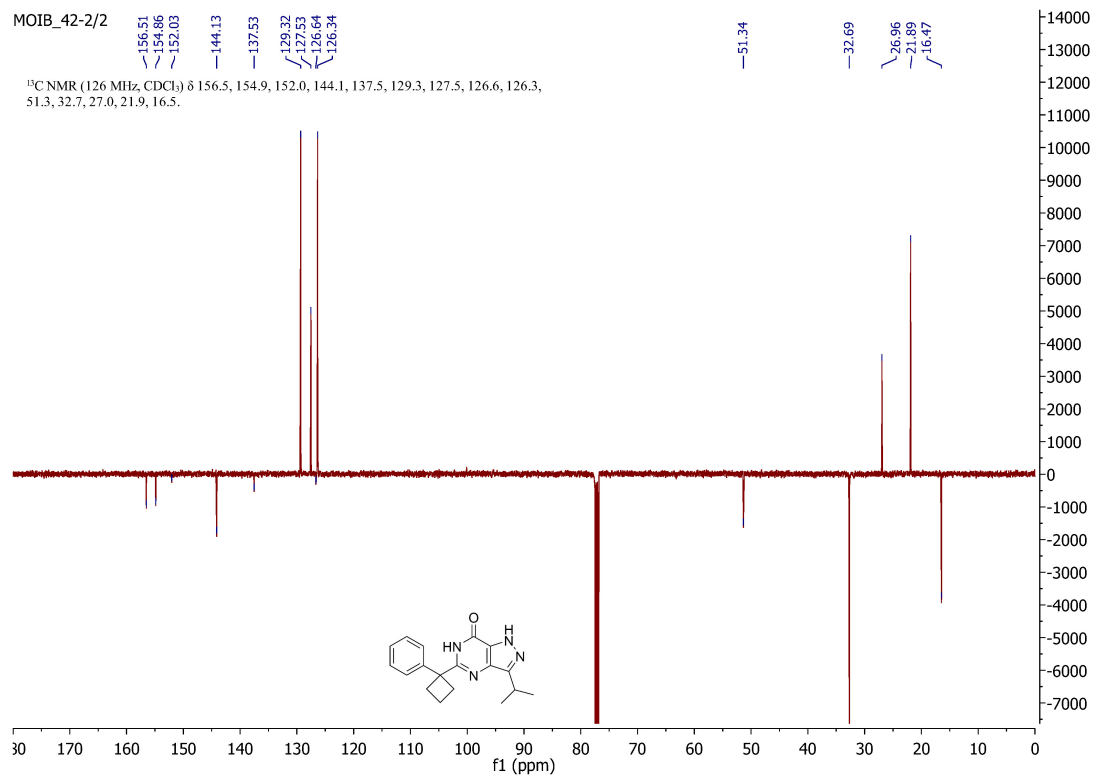

Figure S45. <sup>13</sup>C NMR spectrum of compound **17**.

Acquired by : Admin  
 Date Acquired : 23/4/2018 2:58:02 PM  
 Sample Name : YAZH01-202-3  
 Sample ID :  
 Tray# : 1  
 Vial# : 18  
 Injection Volume : 4  
 Data File : C:\LabSolutions\Data\2018\2018-wk17\YAZH01-202-3.lcd  
 Background File : blanco 23042018.lcd  
 Method File : Method SCAN ACID standard.lcm  
 Report Format : DefaultLCMS.lcr  
 Tuning File : C:\LabSolutions\Tuning\Tuning-ESI-pos-neg01072015a.lct  
 Processed by : Admin  
 Modified Date : 23/4/2018 4:34:04 PM

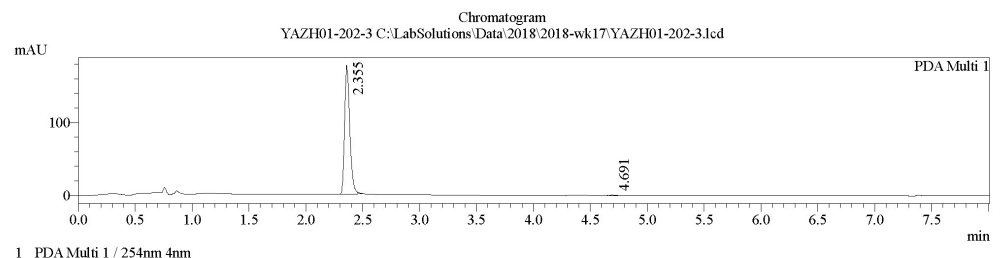

PeakTable

| Peak# | Name | Ret. Time | Area   | Area % |
|-------|------|-----------|--------|--------|
| 1     |      | 2.355     | 553886 | 99.546 |
| 2     |      | 4.691     | 2527   | 0.454  |

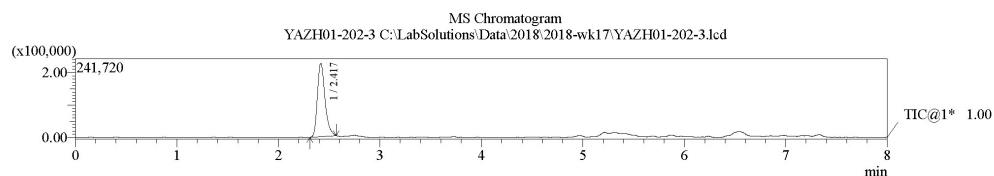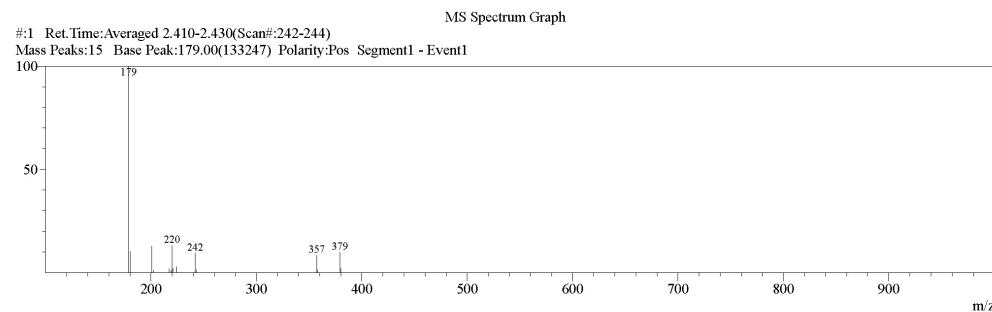

MS Spectrum Table

| #  | m/z    | Abs.Inten. | Rel.Inten. | Charge | Polarity | Monoisotopic |
|----|--------|------------|------------|--------|----------|--------------|
| 1  | 179.00 | 133247     | 100.00     |        |          |              |
| 2  | 180.05 | 13781      | 10.34      |        |          |              |
| 3  | 200.95 | 17230      | 12.93      |        |          |              |
| 4  | 202.00 | 1697       | 1.27       |        |          |              |
| 5  | 217.05 | 2578       | 1.93       |        |          |              |
| 6  | 219.00 | 1491       | 1.12       |        |          |              |
| 7  | 220.10 | 17527      | 13.15      |        |          |              |
| 8  | 221.00 | 2936       | 2.20       |        |          |              |
| 9  | 224.10 | 3951       | 2.97       |        |          |              |
| 10 | 242.00 | 12639      | 9.49       |        |          |              |
| 11 | 243.10 | 1868       | 1.40       |        |          |              |
| 12 | 357.20 | 11149      | 8.37       |        |          |              |
| 13 | 357.85 | 2088       | 1.57       |        |          |              |
| 14 | 379.10 | 13162      | 9.88       |        |          |              |
| 15 | 380.15 | 2832       | 2.13       |        |          |              |

Figure S46. LCMS spectrum of compound **18**.

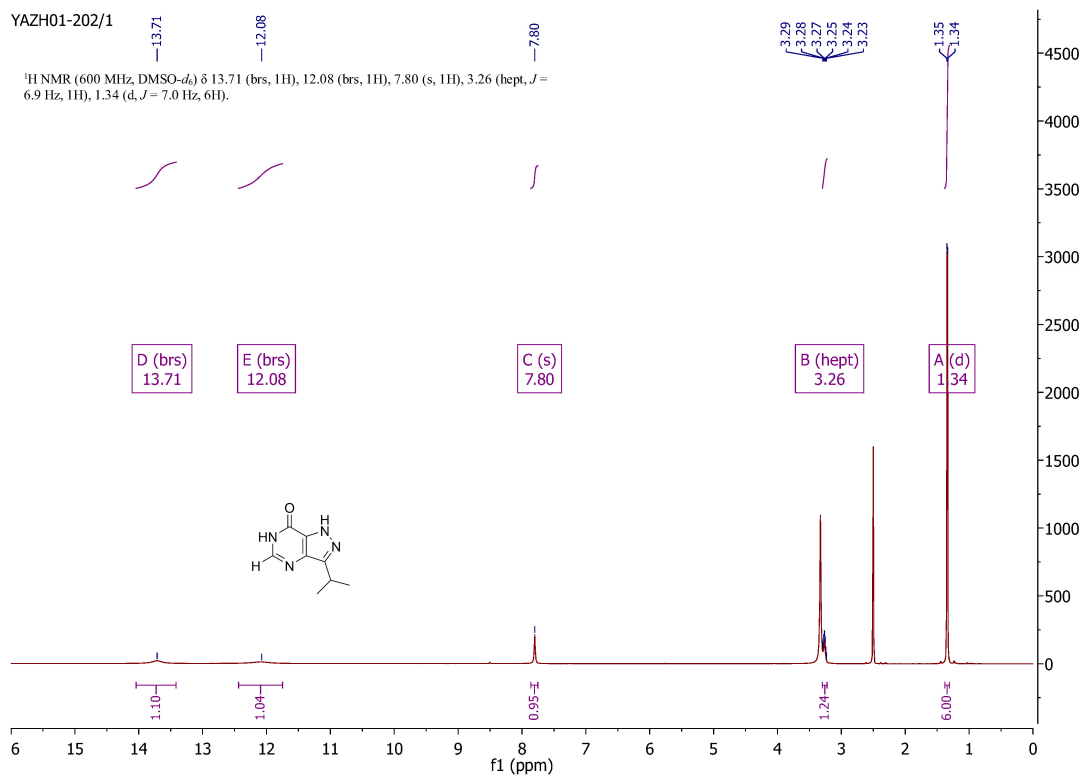

Figure S47. <sup>1</sup>H NMR spectrum of compound **18**.

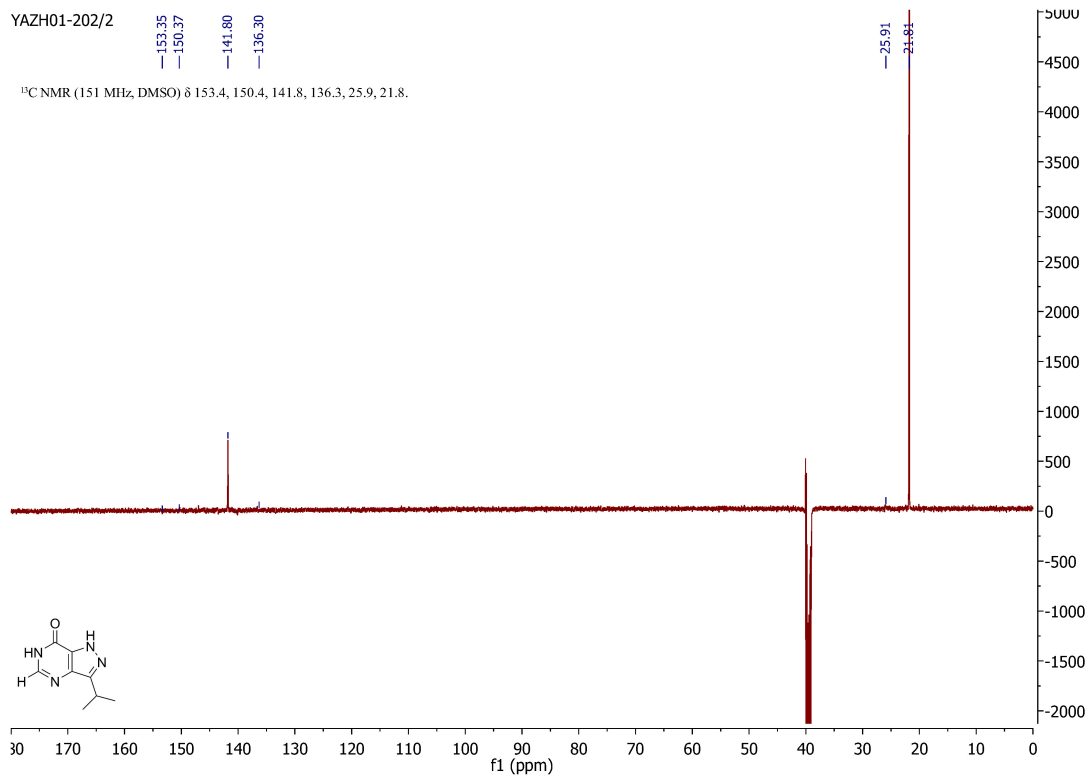

Figure S48. <sup>13</sup>C NMR spectrum of compound **18**.



Acquired by : Admin  
 Date Acquired : 19/4/2018 1:51:00 PM  
 Sample Name : YAZH01-204  
 Sample ID :  
 Tray# : 1  
 Vial# : 19  
 Injection Volume : 4  
 Data File : C:\LabSolutions\Data\2018\2018-wk16\YAZH01-204.lcd  
 Background File : blanco 19042018.lcd  
 Method File : Method SCAN.ACID standard.lcm  
 Report Format : DefaultLCMS.lcr  
 Tuning File : C:\LabSolutions\Tuning\Tuning-ESI-pos-neg01072015a.lct  
 Processed by : Admin  
 Modified Date : 19/4/2018 3:41:19 PM

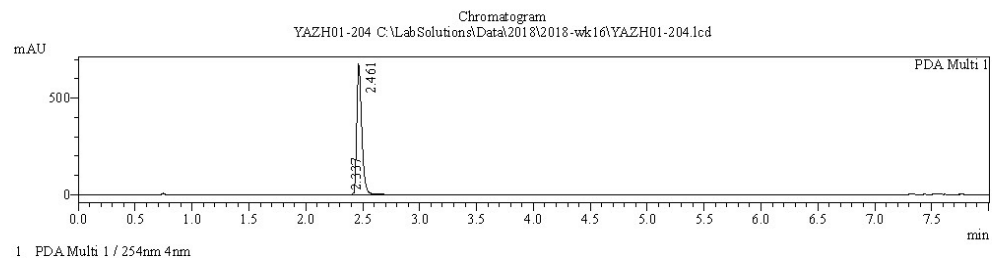

PeakTable

| Peak# | Name | Ret. Time | Area    | Area % |
|-------|------|-----------|---------|--------|
| 1     |      | 2.337     | 446     | 0.022  |
| 2     |      | 2.461     | 2042814 | 99.978 |

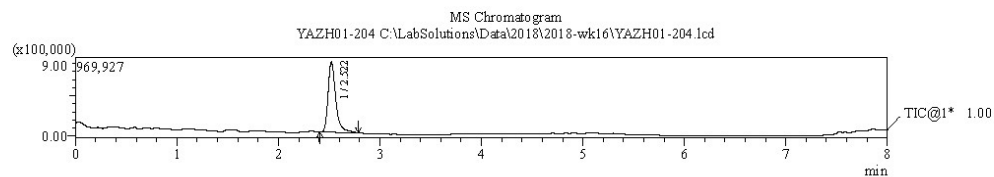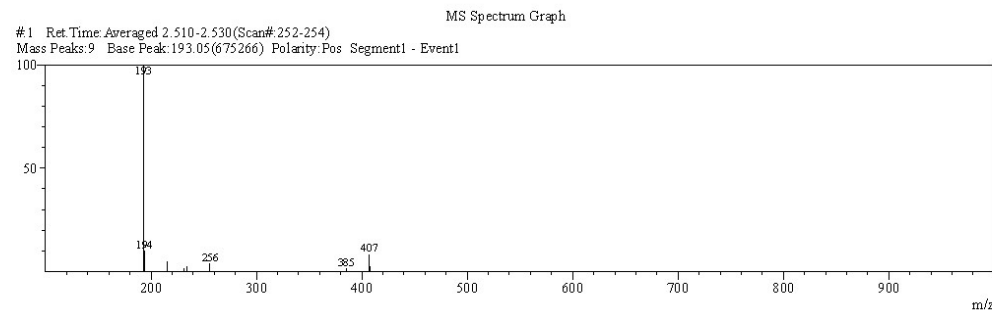

MS Spectrum Table

| # | m/z    | Abs.Inten. | Rel.Inten. | Charge | Polarity | Monoisotopic | # | m/z    | Abs.Inten. | Rel.Inten. | Charge | Polarity | Monoisotopic |
|---|--------|------------|------------|--------|----------|--------------|---|--------|------------|------------|--------|----------|--------------|
| 1 | 193.05 | 675266     | 100.00     |        |          |              | 6 | 256.05 | 24769      | 3.67       |        |          |              |
| 2 | 194.05 | 65587      | 9.71       |        |          |              | 7 | 385.05 | 9084       | 1.35       |        |          |              |
| 3 | 215.00 | 32079      | 4.75       |        |          |              | 8 | 407.15 | 55292      | 8.19       |        |          |              |
| 4 | 231.00 | 8680       | 1.29       |        |          |              | 9 | 408.15 | 15853      | 2.35       |        |          |              |
| 5 | 234.05 | 16383      | 2.43       |        |          |              |   |        |            |            |        |          |              |

Figure S49. LCMS spectrum of compound 19.

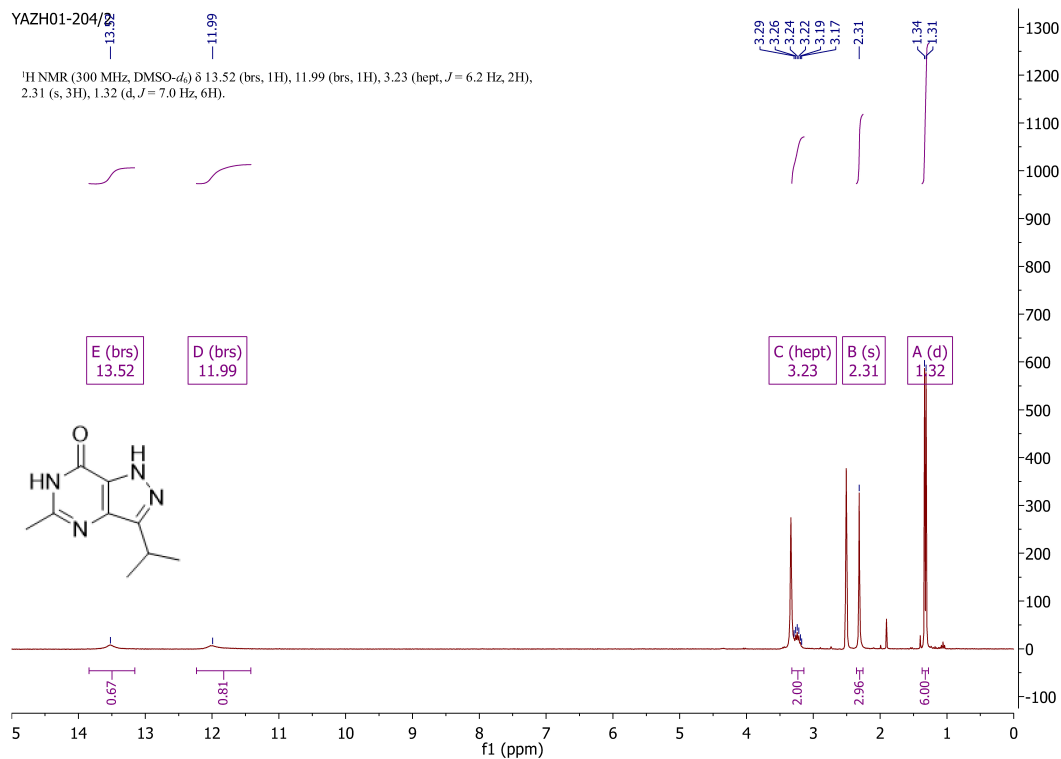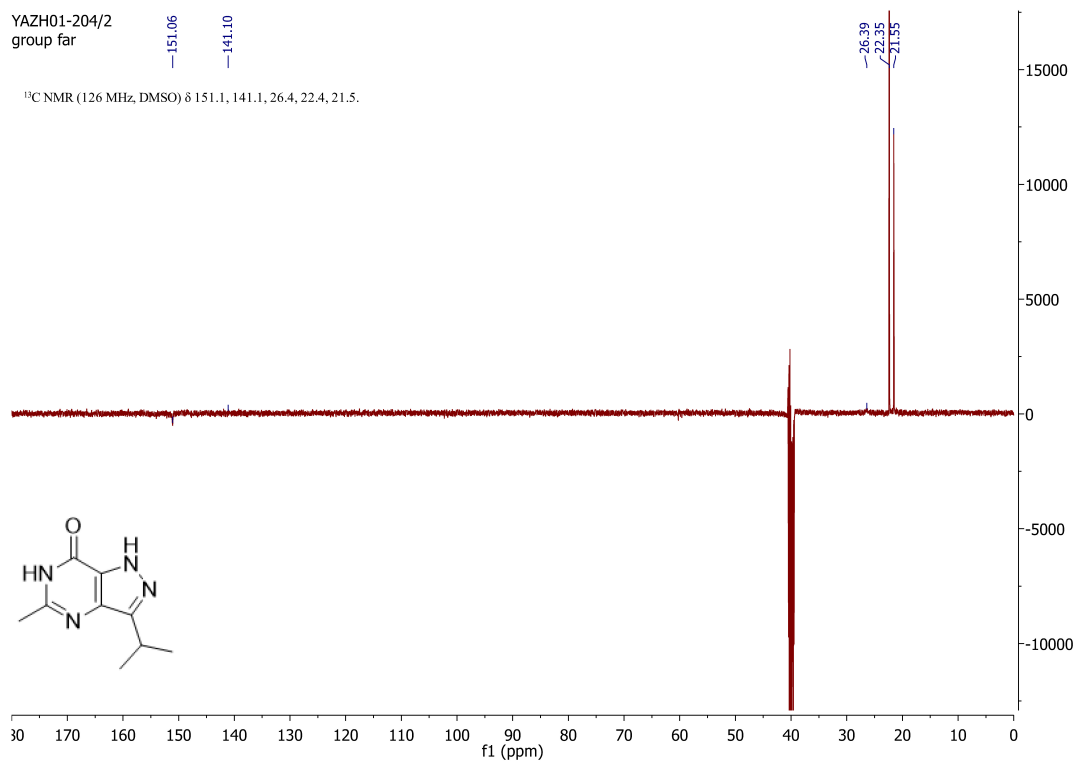

Acquired by : Admin  
 Date Acquired : 19/4/2018 12:59:05 PM  
 Sample Name : YAZH01-203-1  
 Sample ID :  
 Tray# : 1  
 Vial# : 28  
 Injection Volume : 4  
 Data File : C:\LabSolutions\Data\2018\2018-wk16\YAZH01-203-1.lcd  
 Background File : blanco\_19042018.lcd  
 Method File : Method SCAN ACID standard.lcm  
 Report Format : DefaultLCMS.lcr  
 Tuning File : C:\LabSolutions\Tuning\Tuning-ESI-pos-neg01072015a.lct  
 Processed by : Admin  
 Modified Date : 19/4/2018 1:10:48 PM

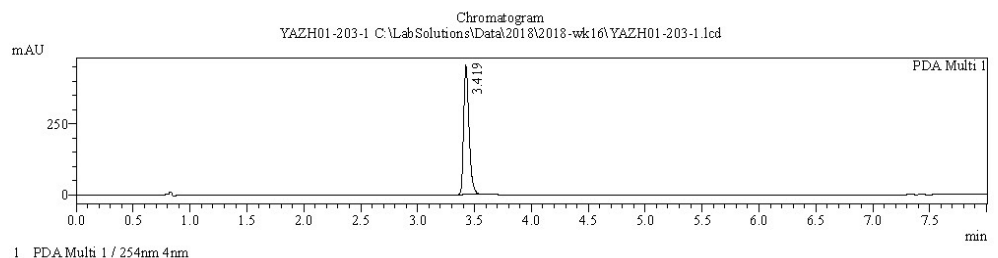

PeakTable

| Peak# | Name | Ret. Time | Area    | Area%   |
|-------|------|-----------|---------|---------|
| 1     |      | 3.419     | 1470710 | 100.000 |

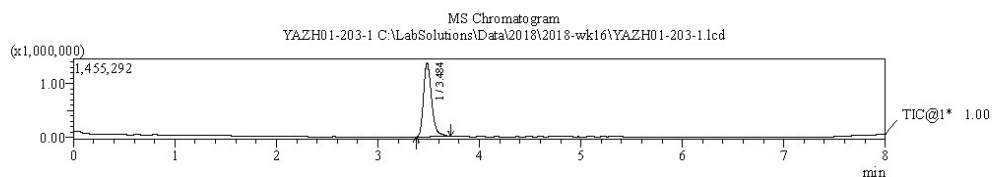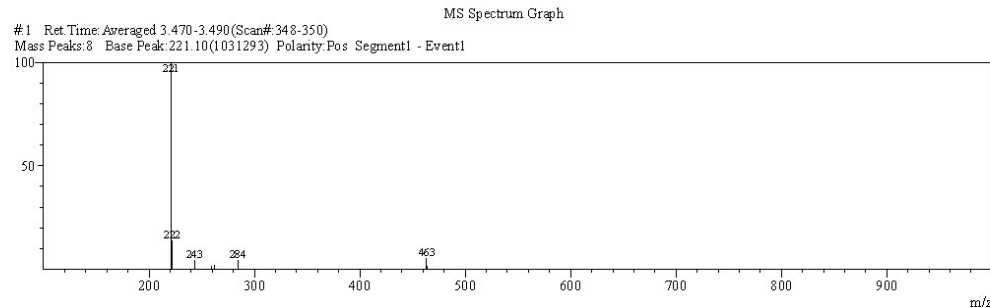

MS Spectrum Table

| # | m/z    | Abs.Inten. | Rel.Inten. | Charge | Polarity | Monoisotopic | # | m/z    | Abs.Inten. | Rel.Inten. | Charge | Polarity | Monoisotopic |
|---|--------|------------|------------|--------|----------|--------------|---|--------|------------|------------|--------|----------|--------------|
| 1 | 221.10 | 1031293    | 100.00     |        |          |              | 5 | 262.05 | 20613      | 2.00       |        |          |              |
| 2 | 222.05 | 140359     | 13.61      |        |          |              | 6 | 284.10 | 42671      | 4.14       |        |          |              |
| 3 | 243.00 | 41841      | 4.06       |        |          |              | 7 | 463.25 | 50815      | 4.93       |        |          |              |
| 4 | 259.10 | 11590      | 1.12       |        |          |              | 8 | 464.20 | 15306      | 1.48       |        |          |              |

Figure S52. LCMS spectrum of compound 20.

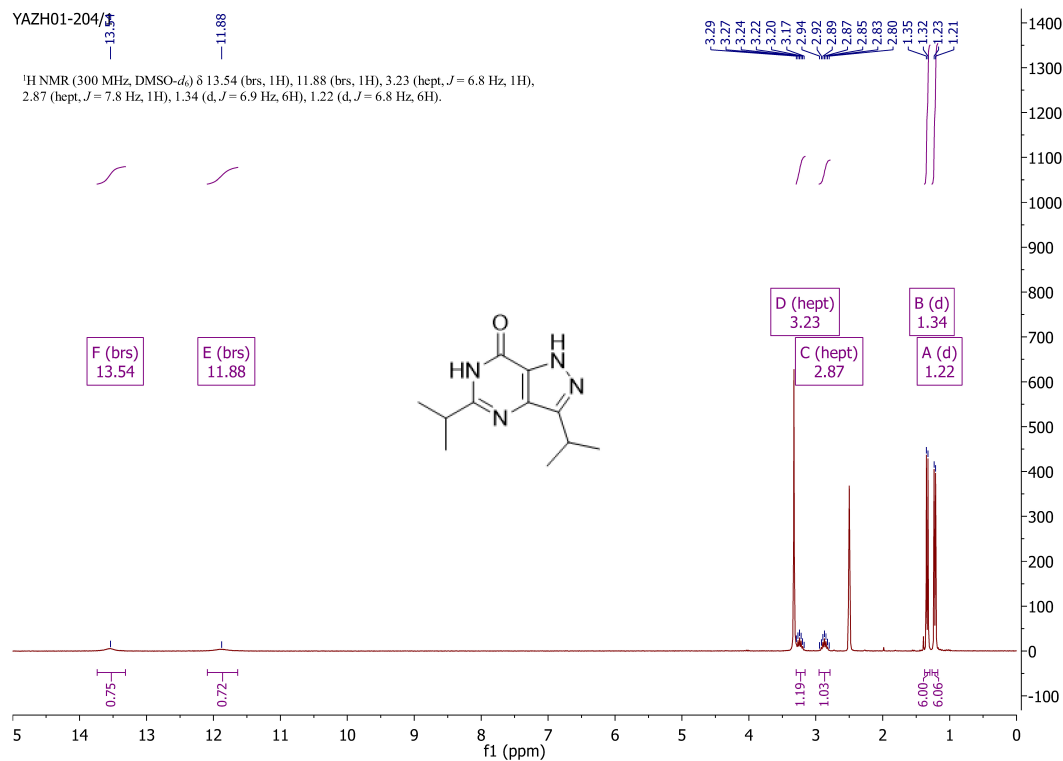

Figure S53. <sup>1</sup>H NMR spectrum of compound 20.

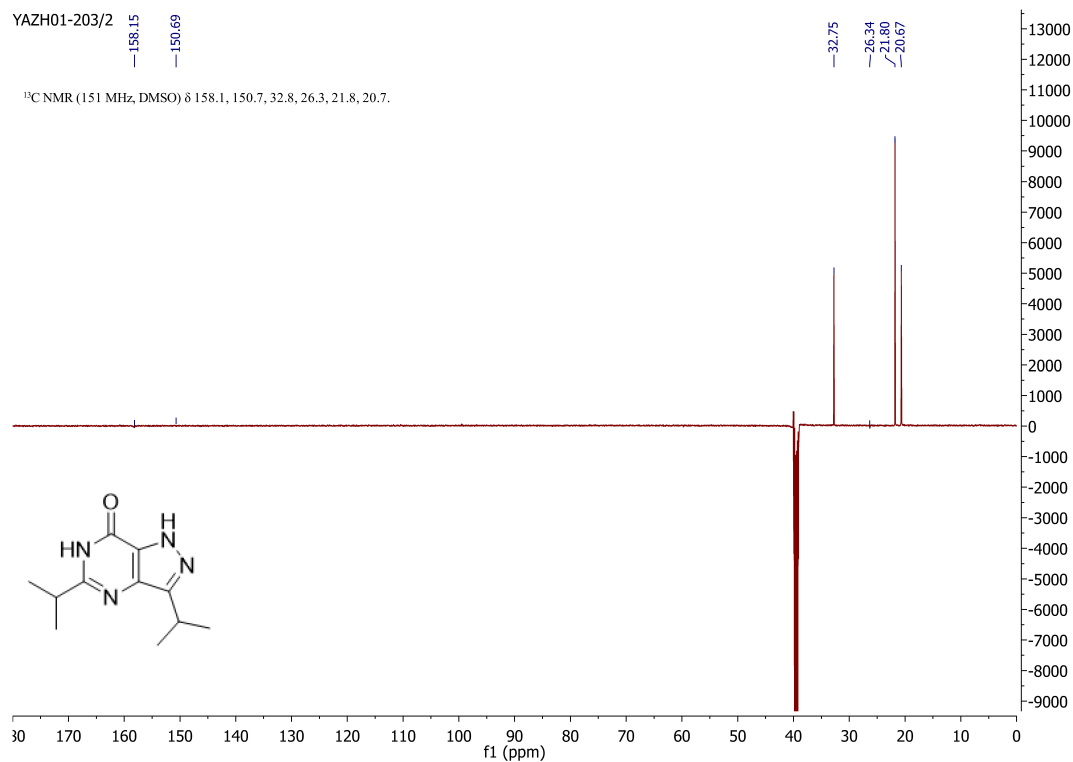

Figure S54. <sup>13</sup>C NMR spectrum of compound 20.

Acquired by : Admin  
 Date Acquired : 1/4/2019 11:04:28 AM  
 Sample Name : YAZH\_39  
 Sample ID :  
 Tray# : 1  
 Vial# : 8  
 Injection Volume : 3  
 Data File : C:\LabSolutions\Data\2019\2019-wk14\YAZH\_391cd  
 Background File : blanco 010420191cd  
 Method File : Method SCAN ACID standard.lcm  
 Report Format : DefaultLCMS.lcr  
 Tuning File : C:\LabSolutions\Tuning\Tuning-ESI-pos-neg01072015a1ct  
 Processed by : Admin  
 Modified Date : 1/4/2019 11:34:36 AM

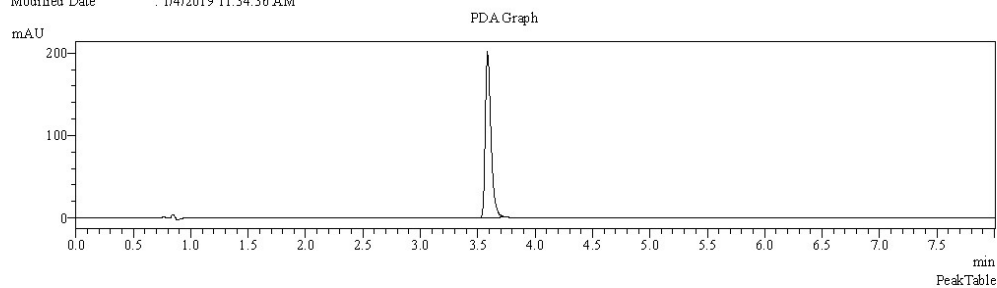

| Peak# | Name | Ret. Time | Area   | Area%   |
|-------|------|-----------|--------|---------|
| 1     |      | 3.581     | 688185 | 100.000 |

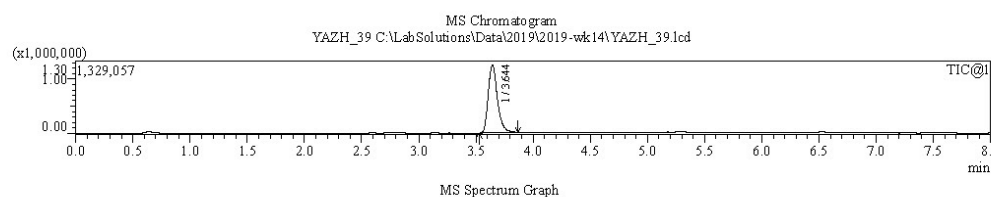

#1 Ret.Time:Averaged 3.630-3.650(Scan#364-366)  
 BG Mode:Calc 3.530<->3.870(354<->388)  
 Mass Peaks:6 Base Peak:235.05(956820) Polarity:Pos Segment1 - Event1

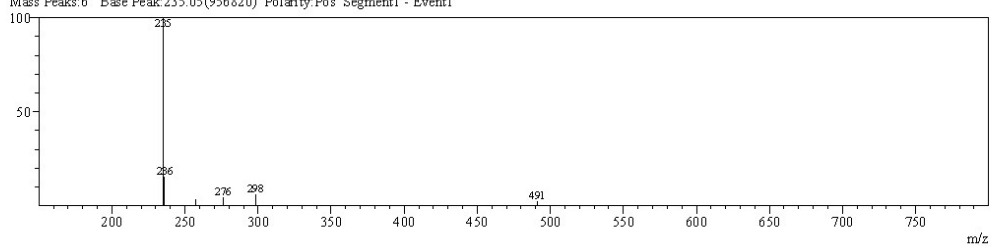

MS Spectrum Table

| # | m/z    | Abs.Inten. | Rel.Inten. | Charge | Polarity | Monoisotopic | # | m/z    | Abs.Inten. | Rel.Inten. | Charge | Polarity | Monoisotopic |
|---|--------|------------|------------|--------|----------|--------------|---|--------|------------|------------|--------|----------|--------------|
| 1 | 235.05 | 956820     | 100.00     |        |          |              | 4 | 276.10 | 38169      | 3.99       |        |          |              |
| 2 | 236.05 | 144245     | 15.08      |        |          |              | 5 | 298.10 | 56634      | 5.92       |        |          |              |
| 3 | 257.10 | 31609      | 3.30       |        |          |              | 6 | 491.30 | 21946      | 2.29       |        |          |              |

Figure S55. LCMS spectrum of compound **21**.

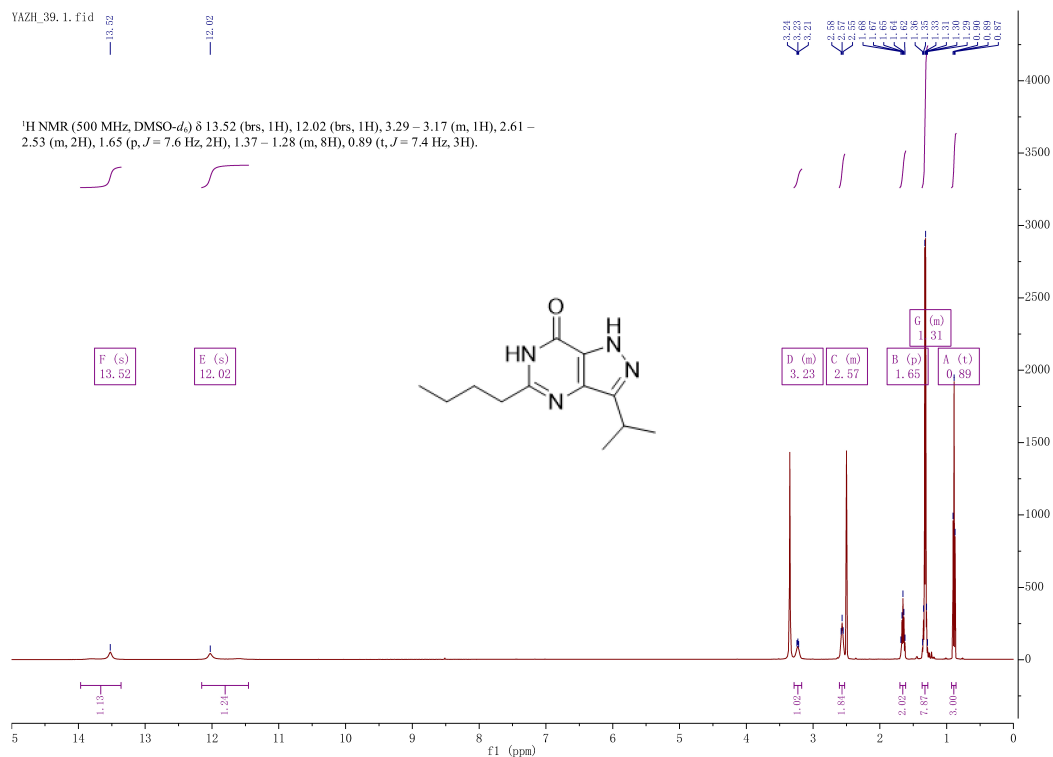

Figure S56. <sup>1</sup>H NMR spectrum of compound **21**.

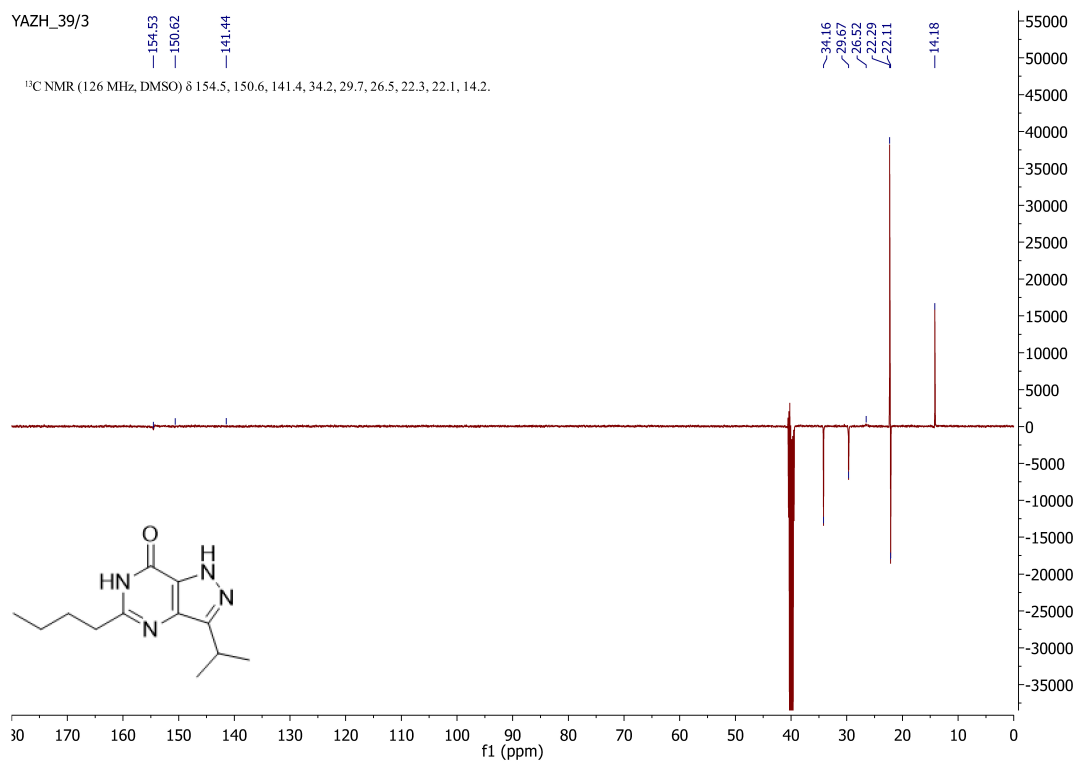

Figure S57. <sup>13</sup>C NMR spectrum of compound **21**.

Acquired by : Admin  
 Date Acquired : 29/3/2018 9:28:24 AM  
 Sample Name : YAZH01-193-1  
 Sample ID :  
 Tray# : 1  
 Vial# : 8  
 Injection Volume : 3  
 Data File : C:\LabSolutions\Data\2018\2018-wk13\YAZH01-193-1.lcd  
 Background File : blanco 29032018.lcd  
 Method File : Method SCAN ACID standard.lcm  
 Report Format : Default1.CMS.lcr  
 Tuning File : C:\LabSolutions\Tuning\Tuning-ESI-pos-neg01072015a.lct  
 Processed by : Admin  
 Modified Date : 29/3/2018 10:22:55 AM

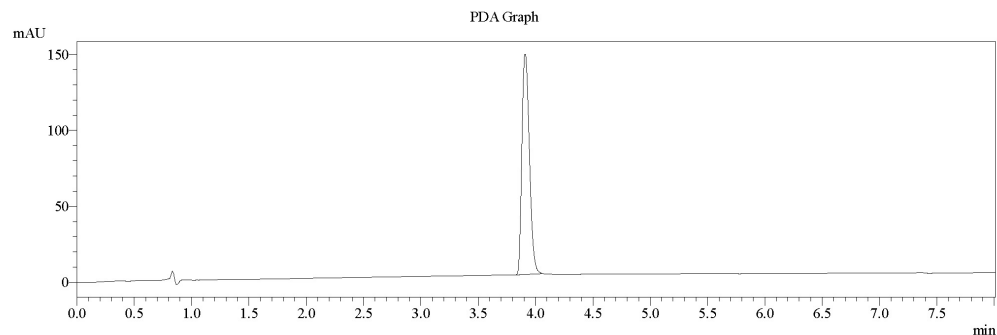

PDA Ch1 254nm 4nm

| Peak# | Name | Ret. Time | Area   | Area %  |
|-------|------|-----------|--------|---------|
| 1     |      | 3.904     | 654641 | 100.000 |

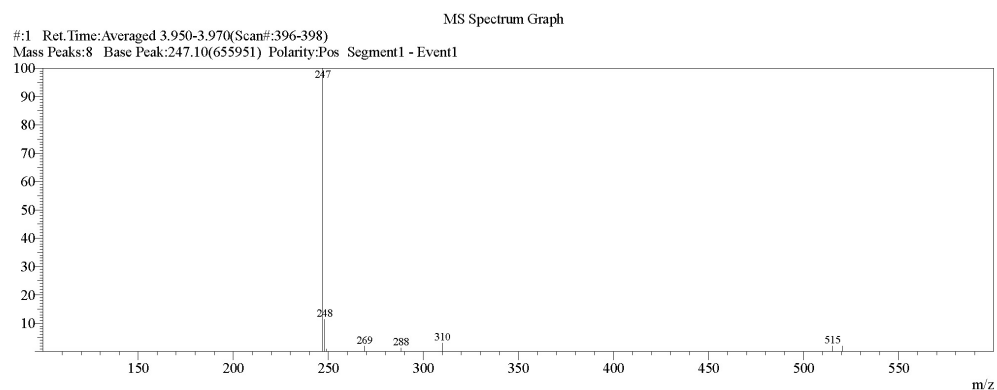

MS Spectrum Table

#1 Ret.Time:  
 BG Mode:Calc 3.850<->4.140(386<->415)  
 Mass Peaks:8 Base Peak:247.10(655951) Polarity:Pos Segment1 - Event1

| # | m/z    | Abs.Inten. | Rel.Inten. | Charge | Polarity | Monoisotopic | # | m/z    | Abs.Inten. | Rel.Inten. | Charge | Polarity | Monoisotopic |
|---|--------|------------|------------|--------|----------|--------------|---|--------|------------|------------|--------|----------|--------------|
| 1 | 247.10 | 655951     | 100.00     |        |          |              | 5 | 288.15 | 8974       | 1.37       |        |          |              |
| 2 | 248.05 | 74336      | 11.33      |        |          |              | 6 | 310.10 | 20141      | 3.07       |        |          |              |
| 3 | 249.05 | 6630       | 1.01       |        |          |              | 7 | 515.30 | 13021      | 1.99       |        |          |              |
| 4 | 269.10 | 12557      | 1.91       |        |          |              | 8 | 520.45 | 12860      | 1.96       |        |          |              |

Figure S58. LCMS spectrum of compound **22**.

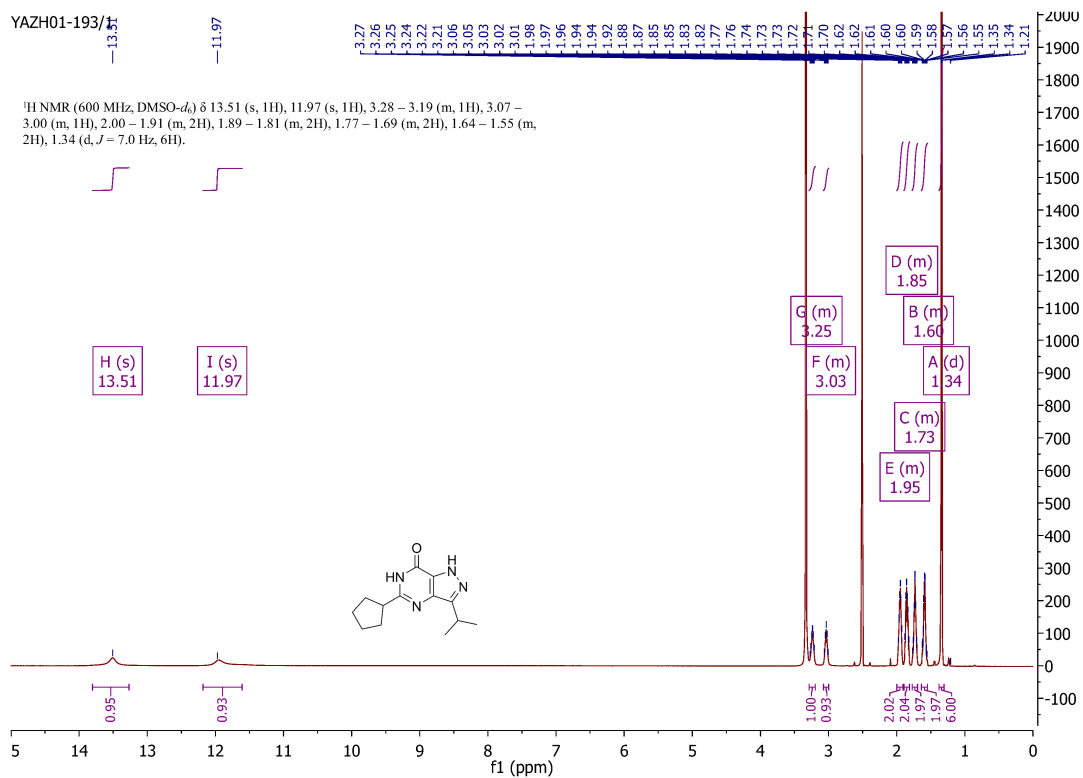

Figure S59. <sup>1</sup>H NMR spectrum of compound **22**.

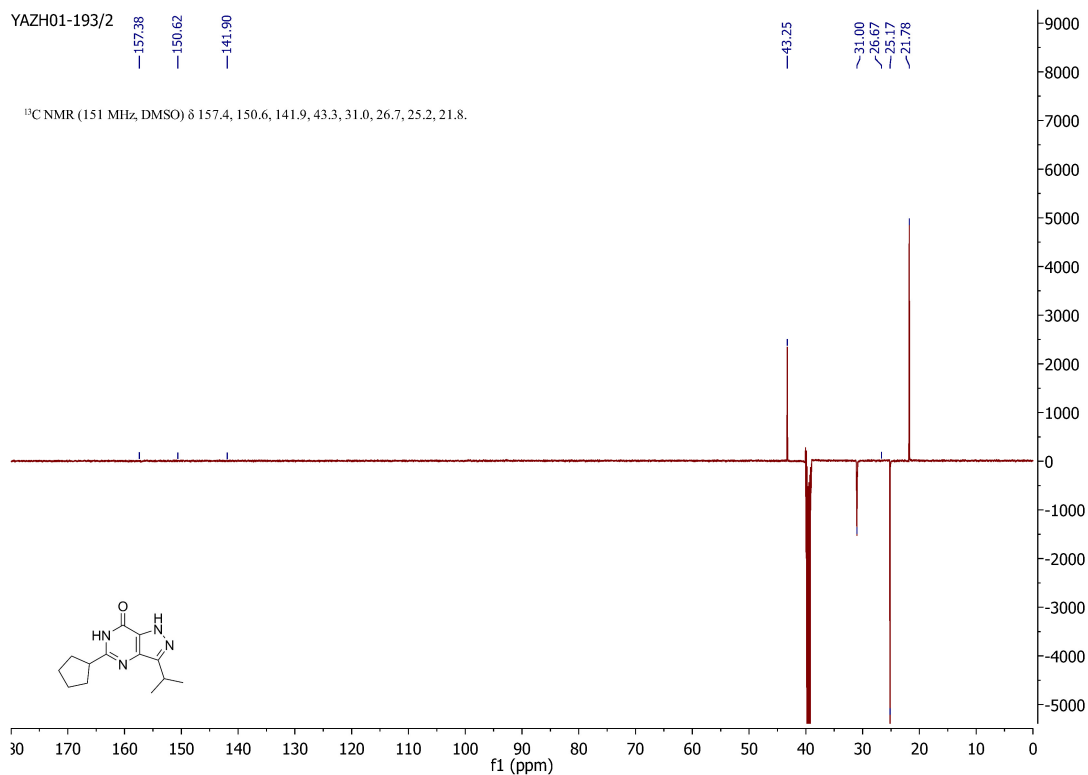

Figure S60. <sup>13</sup>C NMR spectrum of compound **22**.



Acquired by : Admin  
 Date Acquired : 7/8/2018 10:15:24 AM  
 Sample Name : YAZH01-232  
 Sample ID :  
 Tray# : 1  
 Vial# : 5  
 Injection Volume : 3  
 Data File : C:\LabSolutions\Data\2018\2018-wk32\YAZH01-232.lcd  
 Background File : blanco 070818.lcd  
 Method File : Method SCAN ACID standard.lcm  
 Report Format : DefaultLCMS.lcr  
 Tuning File : C:\LabSolutions\Tuning\Tuning-ESI-pos-neg01072015a.lct  
 Processed by : Admin  
 Modified Date : 7/8/2018 10:32:58 AM

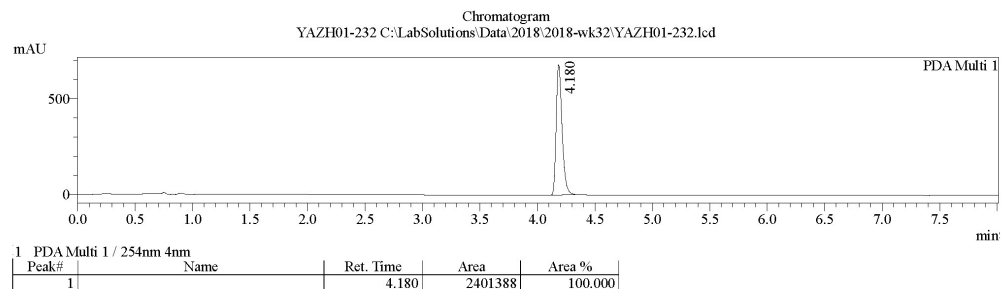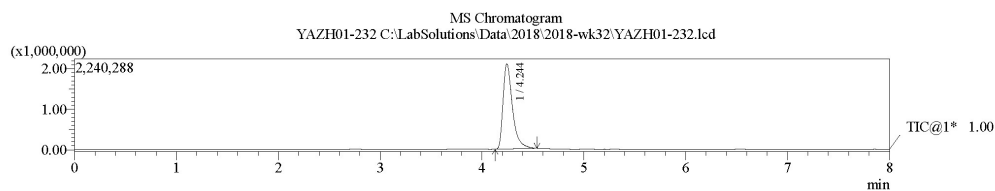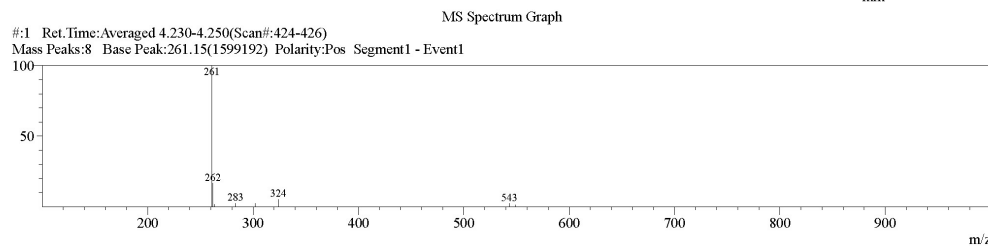

MS Spectrum Table

#1 Ret.Time:  
BG Mode:Calc 4.130<->4.540(414<->455)

| # | m/z    | Abs.Inten. | Rel.Inten. | Charge | Polarity | Monoisotopic |
|---|--------|------------|------------|--------|----------|--------------|
| 1 | 261.15 | 1599192    | 100.00     |        |          |              |
| 2 | 262.15 | 263903     | 16.50      |        |          |              |
| 3 | 263.20 | 27666      | 1.73       |        |          |              |
| 4 | 283.15 | 36865      | 2.31       |        |          |              |
| 5 | 302.25 | 35840      | 2.24       |        |          |              |
| 6 | 324.20 | 81342      | 5.09       |        |          |              |
| 7 | 543.45 | 34252      | 2.14       |        |          |              |
| 8 | 548.75 | 22480      | 1.41       |        |          |              |

Figure S61. LCMS spectrum of compound **23**.

YAZH01-232/2

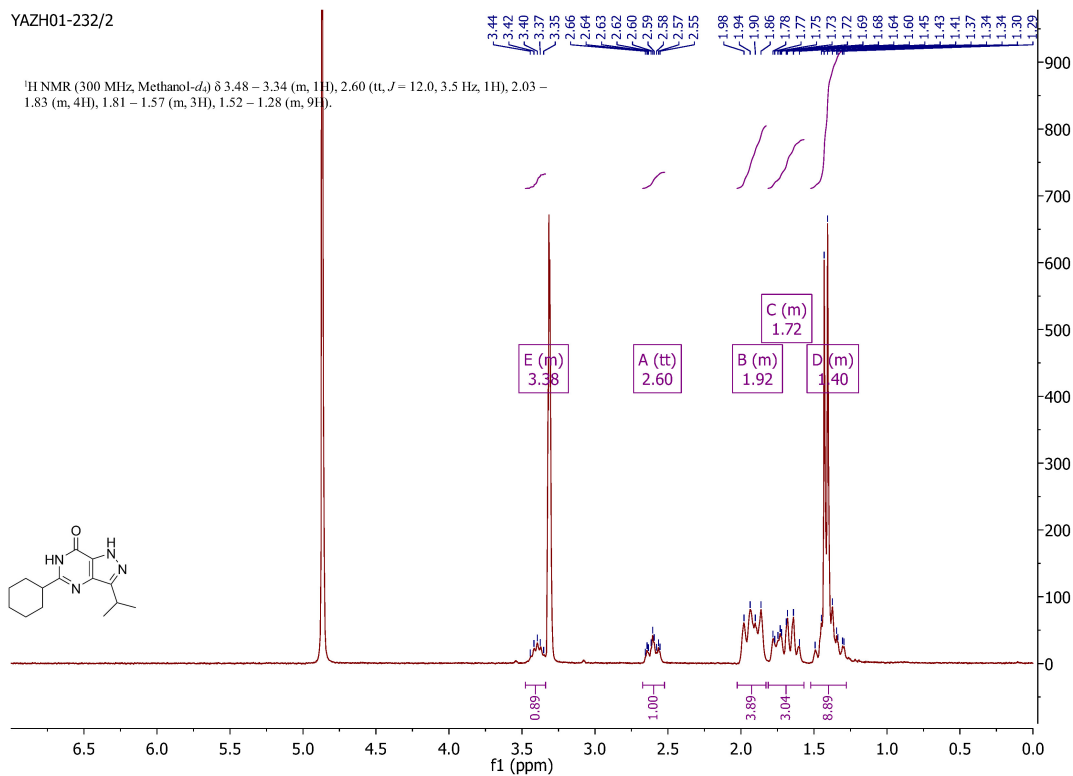Figure S62. <sup>1</sup>H NMR spectrum of compound **23**.

YAZH01-232/3

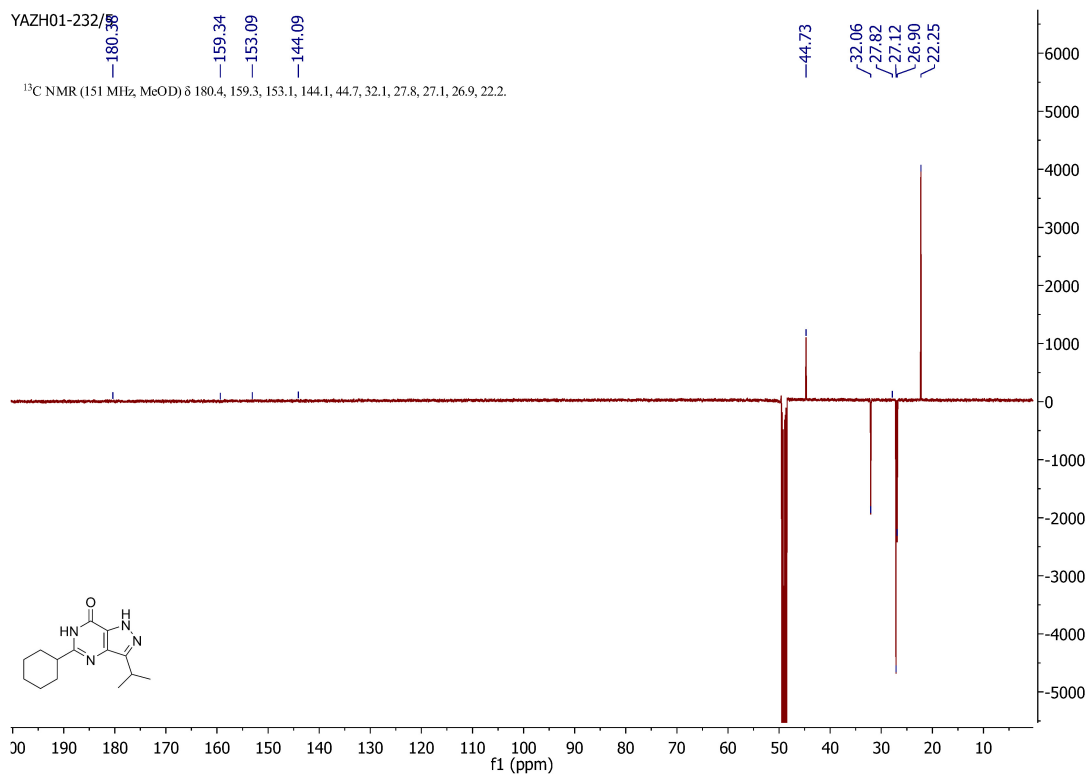Figure S63. <sup>13</sup>C NMR spectrum of compound **23**.

Chromatogram

YAZH01-275 C:\LabSolutions\Data\2018\2018-wk45\YAZH01-275.lcd

mAU

500

0

0.0 0.5 1.0 1.5 2.0 2.5 3.0 3.5 4.0 4.5 5.0 5.5 6.0 6.5 7.0 7.5

min

2.472

3.036

PDA Multi 1

1 PDA Multi 1 / 254nm 4nm

| Peak# | Name | Ret. Time | Area    | Area % |
|-------|------|-----------|---------|--------|
| 1     |      | 2.472     | 15653   | 0.706  |
| 2     |      | 3.036     | 2201037 | 99.294 |

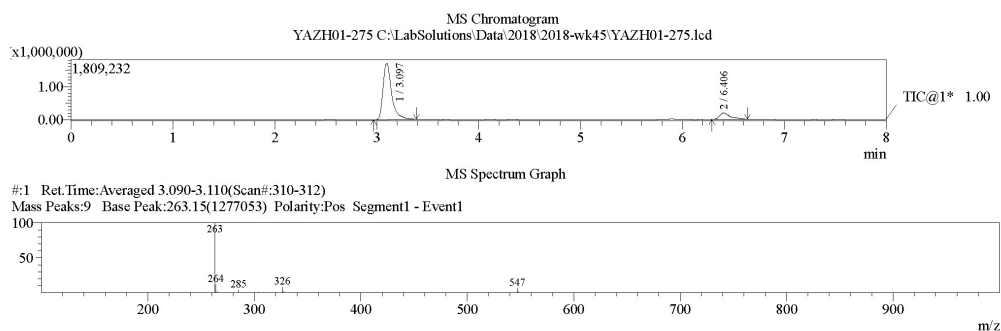

| # | m/z    | Abs.Inten. | Rel.Inten. | Charge | Polarity | Monoisotopic |
|---|--------|------------|------------|--------|----------|--------------|
| 1 | 263.15 | 1277053    | 100.00     |        |          |              |
| 2 | 264.10 | 148539     | 11.63      |        |          |              |
| 3 | 265.15 | 20956      | 1.64       |        |          |              |
| 4 | 285.10 | 50169      | 3.93       |        |          |              |
| 5 | 304.20 | 13827      | 1.08       |        |          |              |

S45

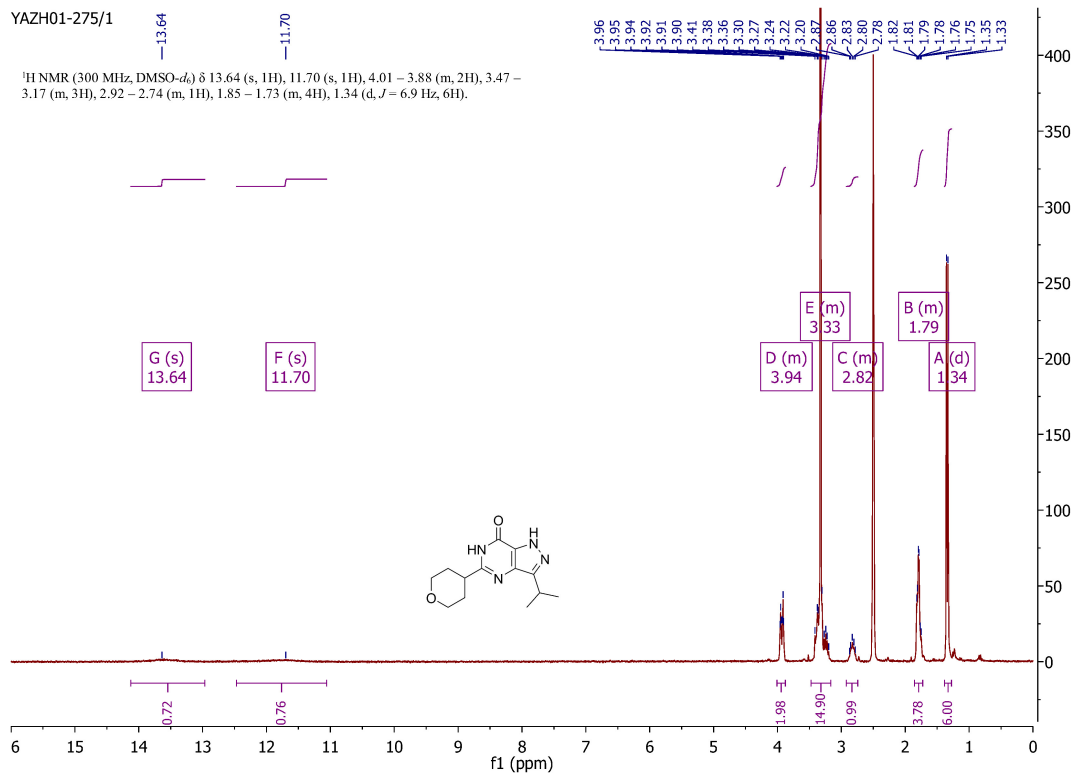

Figure S65. <sup>1</sup>H NMR spectrum of compound **24**.

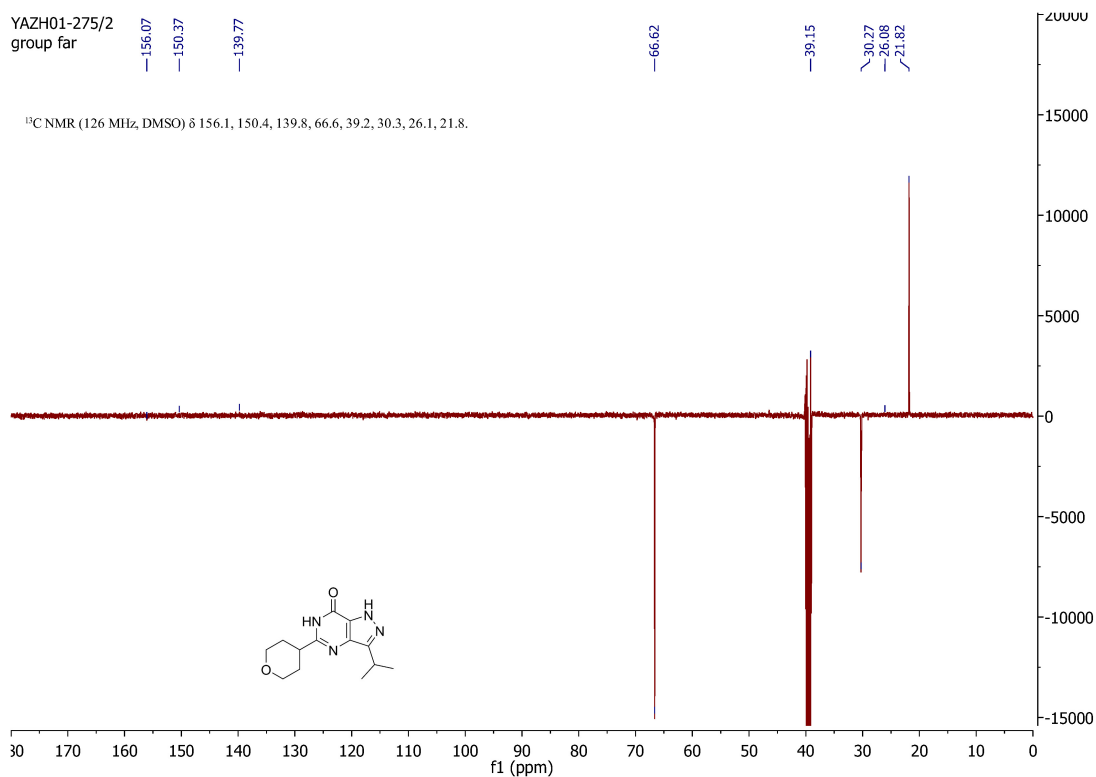

Figure S66. <sup>13</sup>C NMR spectrum of compound **24**.

Acquired by : Admin  
 Date Acquired : 5/4/2018 5:27:19 PM  
 Sample Name : YAZH01-194  
 Sample ID :  
 Tray# : 1  
 Vial# : 14  
 Injection Volume : 3  
 Data File : C:\LabSolutions\Data\2018\2018-wk14\YAZH01-194.lcd  
 Background File : blanco 05042018.lcd  
 Method File : Method SCAN ACID standard.lcm  
 Report Format : DefaultLCMS.lcr  
 Tuning File : C:\LabSolutions\Tuning\Tuning-ESI-pos-neg01072015a.lct  
 Processed by : Admin  
 Modified Date : 6/4/2018 9:00:06 AM

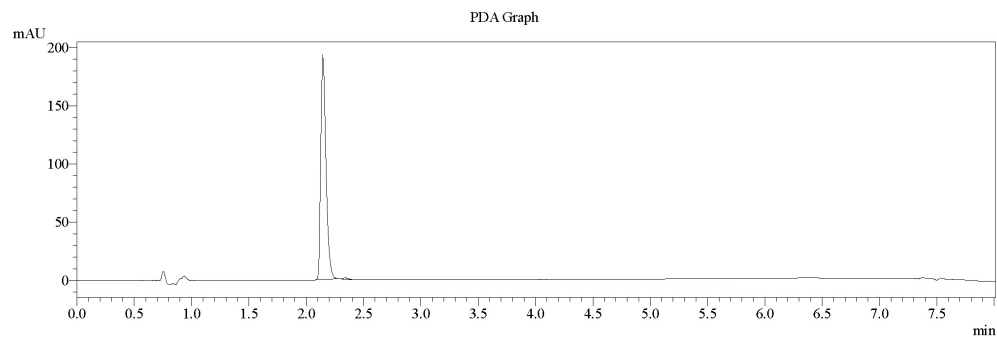

PDA Ch1 254nm 4nm

| Peak# | Name | Ret. Time | Area   | Area % |
|-------|------|-----------|--------|--------|
| 1     |      | 2.140     | 605229 | 99.419 |
| 2     |      | 2.335     | 3536   | 0.581  |

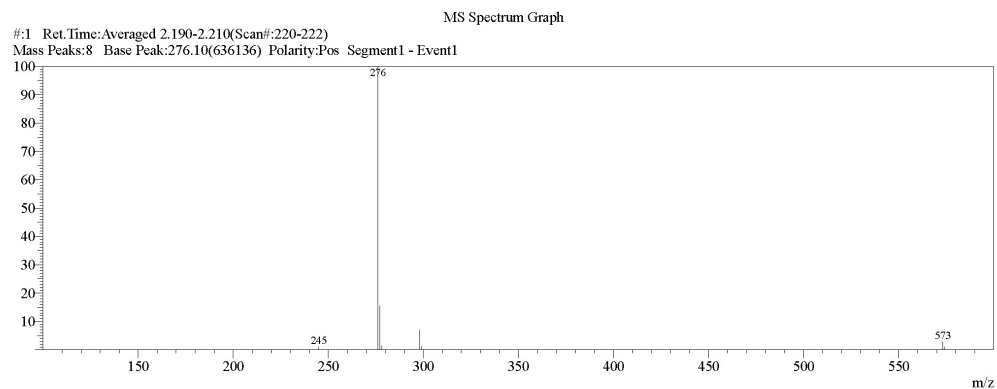

MS Spectrum Table

#1 Ret.Time:  
 BG Mode:Calc 2.100<->2.350(211<->236)  
 Mass Peaks:8 Base Peak:276.10(636136) Polarity:Pos Segment1 - Event1

| # | m/z    | Abs.Inten. | Rel.Inten. | Charge | Polarity | Monoisotopic | # | m/z    | Abs.Inten. | Rel.Inten. | Charge | Polarity | Monoisotopic |
|---|--------|------------|------------|--------|----------|--------------|---|--------|------------|------------|--------|----------|--------------|
| 1 | 245.05 | 7520       | 1.18       |        |          |              | 5 | 298.10 | 44279      | 6.96       |        |          |              |
| 2 | 276.10 | 636136     | 100.00     |        |          |              | 6 | 299.15 | 8104       | 1.27       |        |          |              |
| 3 | 277.10 | 98297      | 15.45      |        |          |              | 7 | 573.25 | 17879      | 2.81       |        |          |              |
| 4 | 278.15 | 8866       | 1.39       |        |          |              | 8 | 574.25 | 6830       | 1.07       |        |          |              |

Figure S67. LCMS spectrum of compound 25.

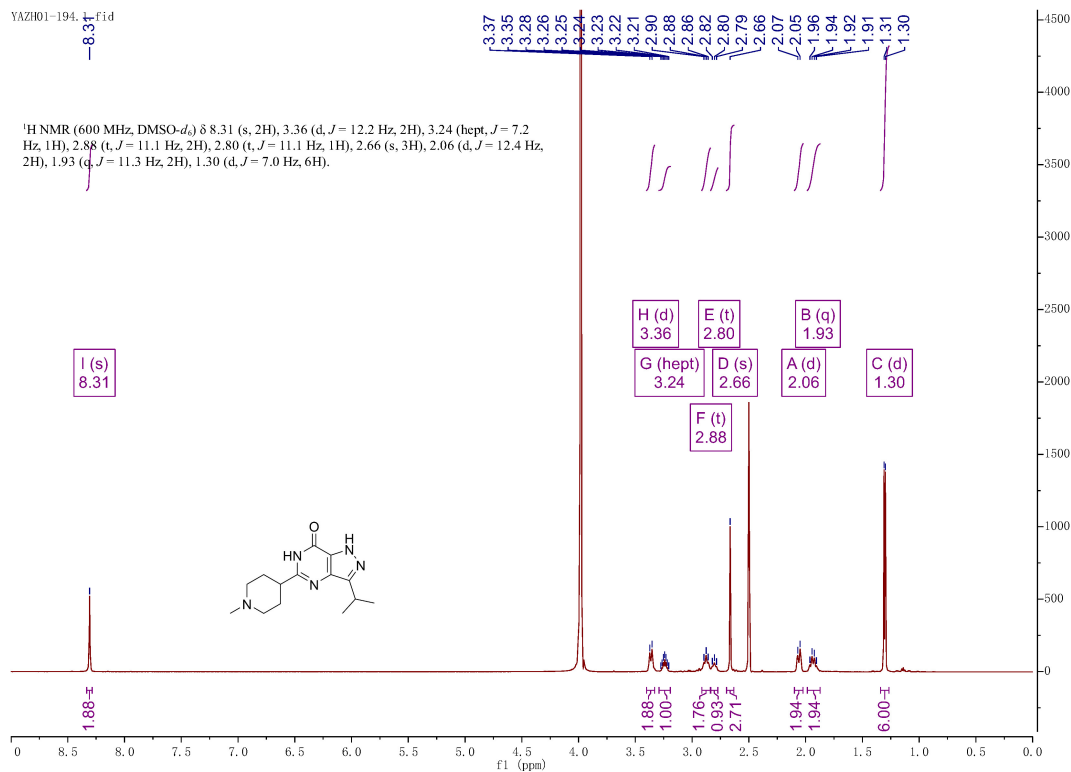

Figure S68. <sup>1</sup>H NMR spectrum of compound 25.

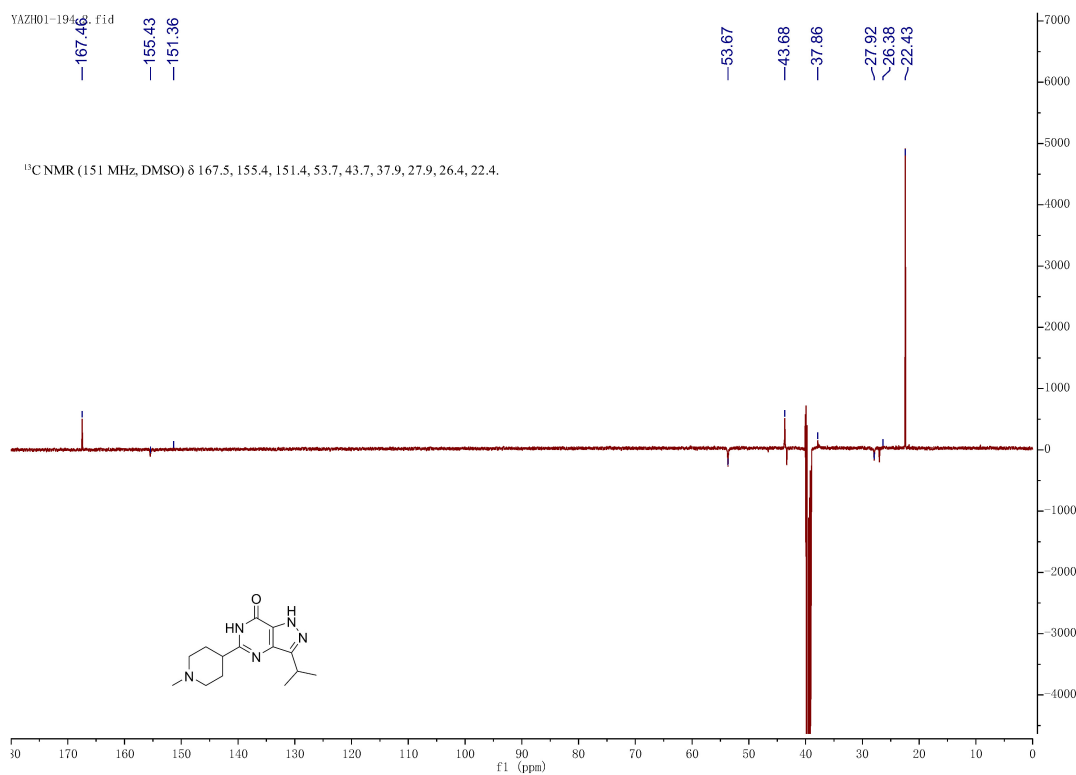

Figure S69. <sup>13</sup>C NMR spectrum of compound 25.

Acquired by : Admin  
 Date Acquired : 7/12/2018 10:21:27 AM  
 Sample Name : YAZH01-276-P1  
 Sample ID :  
 Tray# : 1  
 Vial# : 7  
 Injection Volume : 3  
 Data File : C:\LabSolutions\Data\2018\2018-wk49\YAZH01-276-P1.lcd  
 Background File : blanco 07122018.lcd  
 Method File : Method SCAN ACID standard MW501cm  
 Report Format : DefaultLCMS.lcr  
 Tuning File : C:\LabSolutions\Tuning\Tuning-ESI-pos-neg01072015a.lct  
 Processed by : Admin  
 Modified Date : 7/12/2018 10:37:14 AM

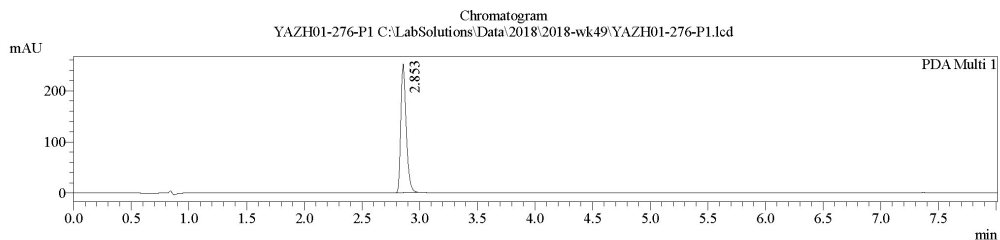

PeakTabl

| Peak# | Name | Ret. Time | Area   | Area %  |
|-------|------|-----------|--------|---------|
| 1     |      | 2.853     | 807774 | 100.000 |

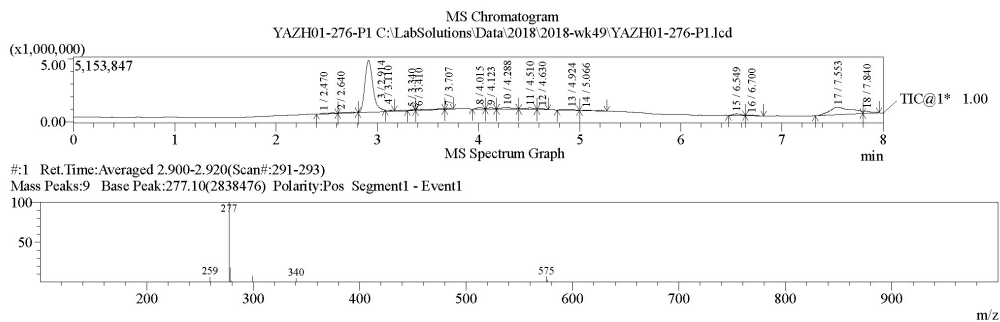

MS Spectrum Table

| # | m/z    | Abs.Inten. | Rel.Inten. | Charge | Polarity | Monoisotopic |
|---|--------|------------|------------|--------|----------|--------------|
| 1 | 259.15 | 177815     | 6.26       |        |          |              |
| 2 | 260.10 | 28686      | 1.01       |        |          |              |
| 3 | 277.10 | 2838476    | 100.00     |        |          |              |
| 4 | 278.10 | 508217     | 17.90      |        |          |              |
| 5 | 279.15 | 46144      | 1.63       |        |          |              |
| 6 | 299.10 | 215360     | 7.59       |        |          |              |
| 7 | 340.15 | 128198     | 4.52       |        |          |              |
| 8 | 575.35 | 194211     | 6.84       |        |          |              |
| 9 | 576.40 | 75235      | 2.65       |        |          |              |

Figure S70. LCMS spectrum of compound **26**.

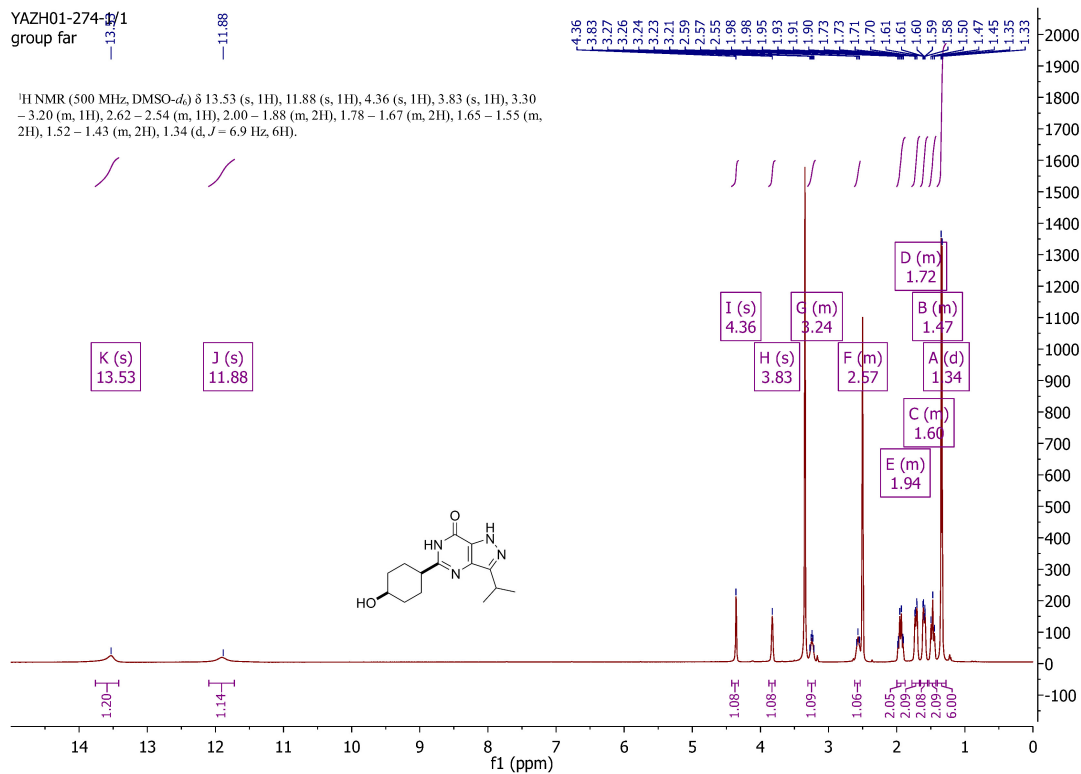

Figure S71.  $^1\text{H}$  NMR spectrum of compound 26.

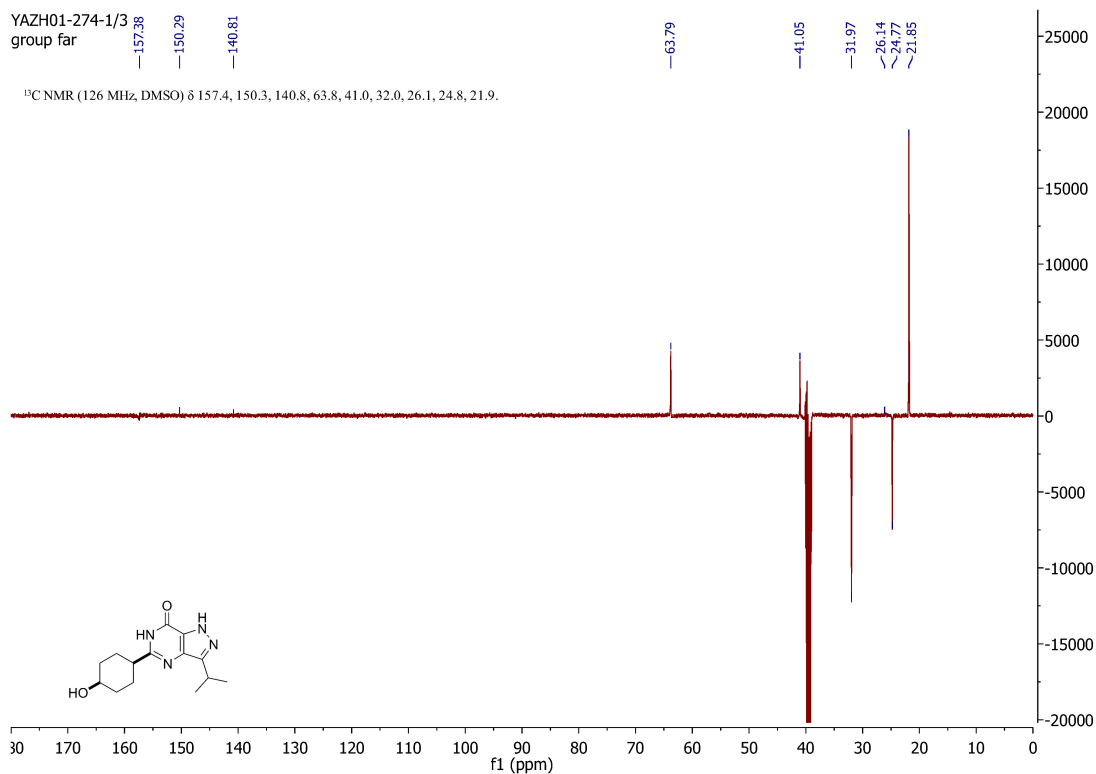

Figure S72.  $^{13}\text{C}$  NMR spectrum of compound 26.



Acquired by : Admin  
 Date Acquired : 7/12/2018 10:30:05 AM  
 Sample Name : YAZH01-276-P2  
 Sample ID :  
 Tray# : 1  
 Vial# : 8  
 Injection Volume : 3  
 Data File : C:\LabSolutions\Data\2018\2018-wk49\YAZH01-276-P2.lcd  
 Background File : blanco 07122018.lcd  
 Method File : Method SCAN ACID standard MW50.lcm  
 Report Format : DefaultLCMS.lcr  
 Tuning File : C:\LabSolutions\Tuning\Tuning-ESI-pos-neg01072015a.lct  
 Processed by : Admin  
 Modified Date : 7/12/2018 10:38:36 AM

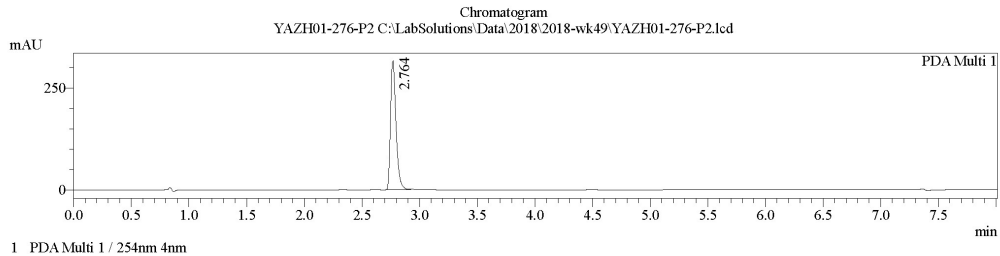

Peak Tabl

| Peak# | Name | Ret. Time | Area    | Area %  |
|-------|------|-----------|---------|---------|
| 1     |      | 2.764     | 1036667 | 100.000 |

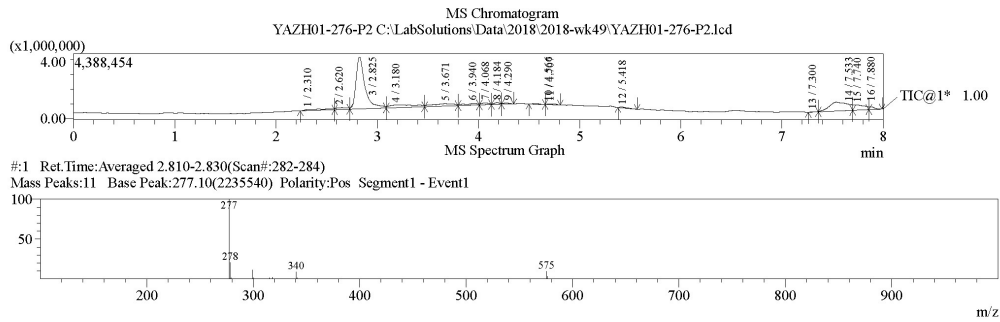

MS Spectrum Table

#1 Ret.Time:  
BG Mode:Calc 2.730<->3.090(274<->310)

| # | m/z    | Abs.Inten. | Rel.Inten. | Charge | Polarity | Monoisotopic | #  | m/z    | Abs.Inten. | Rel.Inten. | Charge | Polarity | Monoisotopic |
|---|--------|------------|------------|--------|----------|--------------|----|--------|------------|------------|--------|----------|--------------|
| 1 | 277.10 | 2235540    | 100.00     |        |          |              | 7  | 318.15 | 46313      | 2.07       |        |          |              |
| 2 | 278.15 | 459389     | 20.55      |        |          |              | 8  | 340.15 | 198712     | 8.89       |        |          |              |
| 3 | 279.10 | 39279      | 1.76       |        |          |              | 9  | 341.05 | 28770      | 1.29       |        |          |              |
| 4 | 299.10 | 257502     | 11.52      |        |          |              | 10 | 575.35 | 213346     | 9.54       |        |          |              |
| 5 | 300.15 | 31026      | 1.39       |        |          |              | 11 | 576.40 | 73707      | 3.30       |        |          |              |
| 6 | 315.15 | 35250      | 1.58       |        |          |              |    |        |            |            |        |          |              |

Figure S73. LCMS spectrum of compound 27.

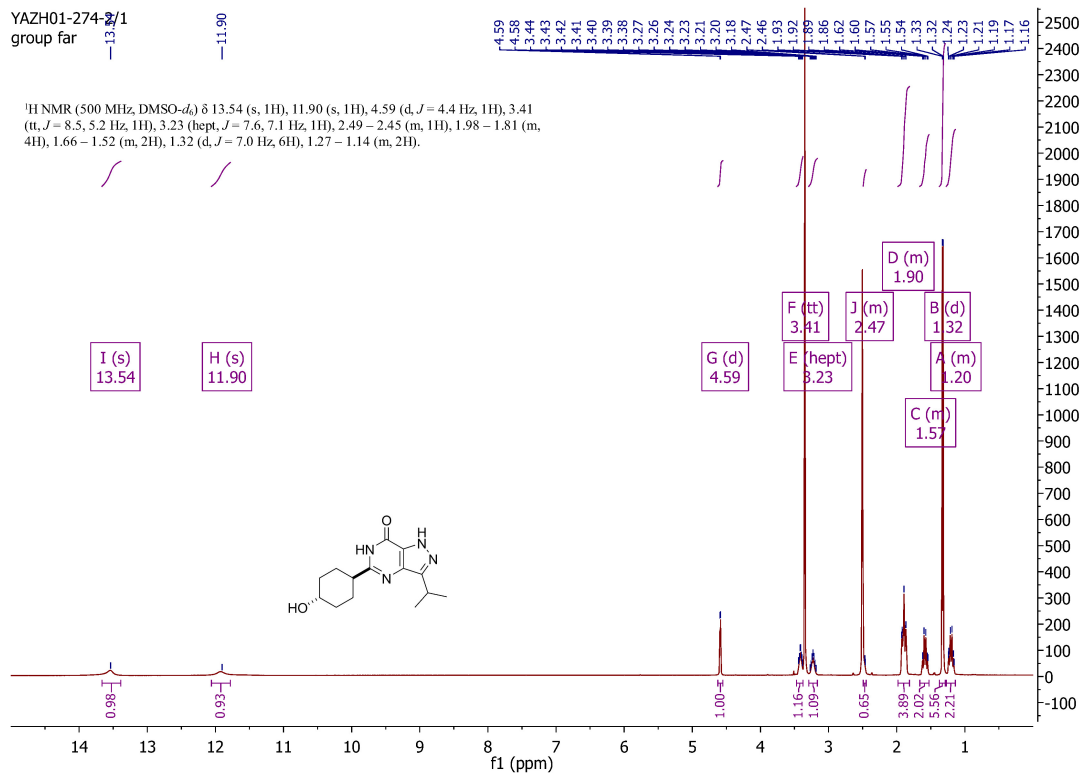

Figure S74. <sup>1</sup>H NMR spectrum of compound 27.

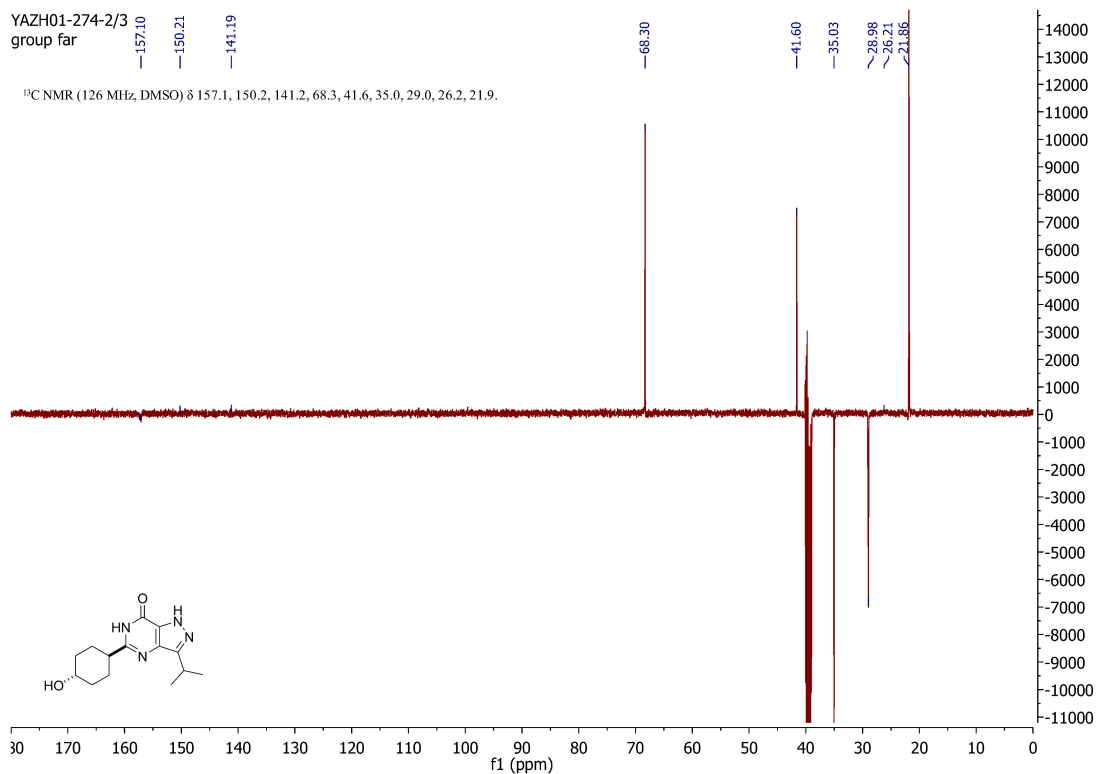

Figure S75. <sup>13</sup>C NMR spectrum of compound 27.

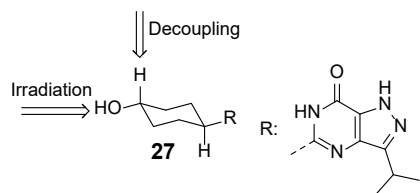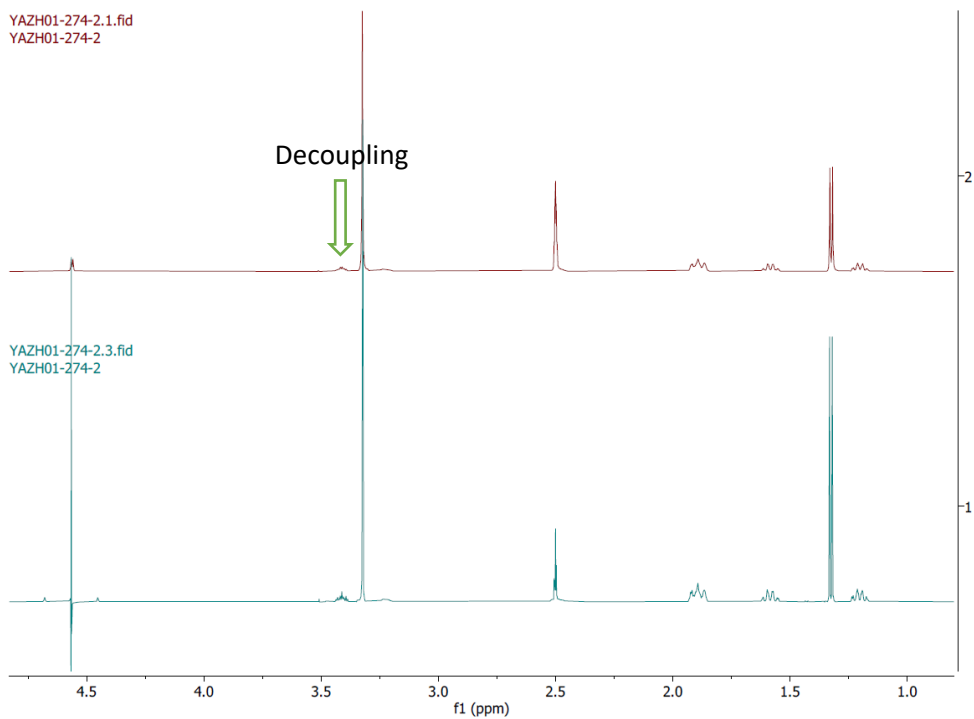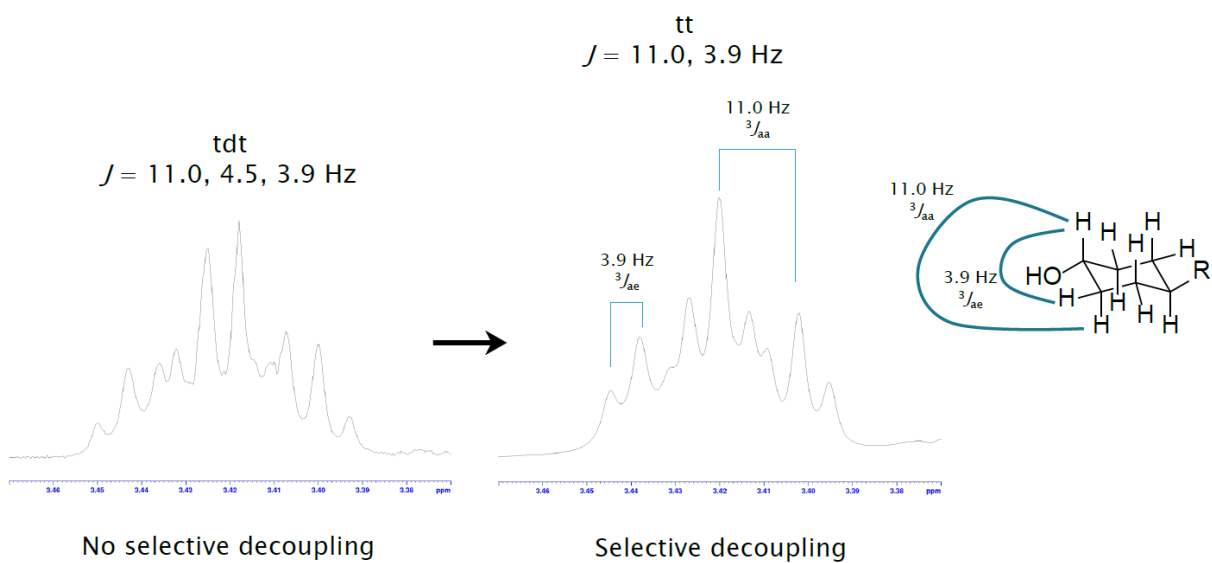

Figure S76. <sup>1</sup>H NMR spectrum of compound **27** before (red, left) and after decoupling (green, right).

Acquired by : Admin  
 Date Acquired : 8/11/2018 10:31:25 AM  
 Sample Name : YAZH01-277  
 Sample ID :  
 Tray# : 1  
 Vial# : 14  
 Injection Volume : 5  
 Data File : C:\LabSolutions\Data\2018\2018-wk45\YAZH01-277.lcd  
 Background File : blanco 08112018.lcd  
 Method File : Method SCAN ACID standard.lcm  
 Report Format : DefaultLCMS.lcr  
 Tuning File : C:\LabSolutions\Tuning\Tuning-ESI-pos-neg01072015a.lct  
 Processed by : Admin  
 Modified Date : 8/11/2018 10:44:00 AM

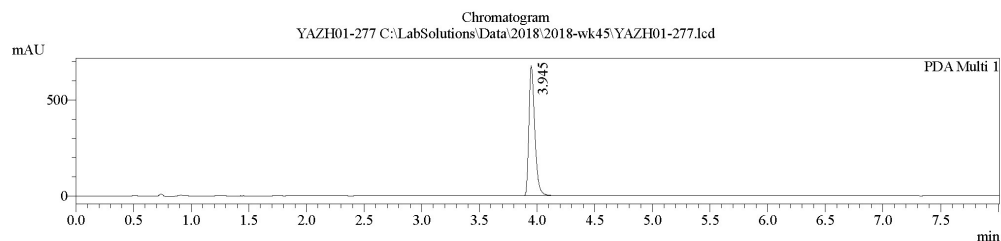

| Peak# | Name | Ret. Time | Area    | Area %  |
|-------|------|-----------|---------|---------|
| 1     |      | 3.945     | 2382178 | 100.000 |

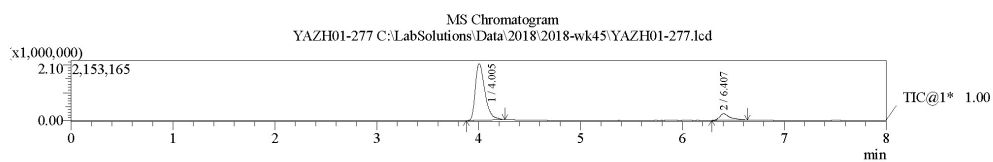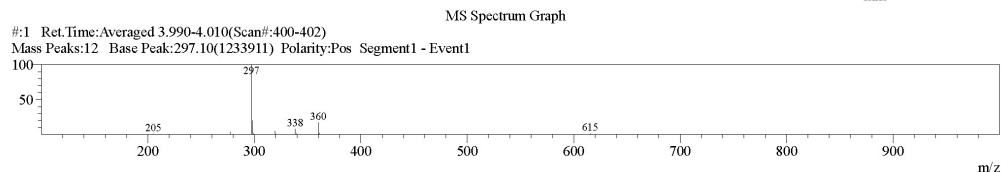

MS Spectrum Table

#1 Ret.Time:  
BG Mode:Calc 3.880<->4.260(389<->427)

| # | m/z    | Abs.Inten. | Rel.Inten. | Charge | Polarity | Monoisotopic | #  | m/z    | Abs.Inten. | Rel.Inten. | Charge | Polarity | Monoisotopic |
|---|--------|------------|------------|--------|----------|--------------|----|--------|------------|------------|--------|----------|--------------|
| 1 | 205.05 | 12632      | 1.02       |        |          |              | 7  | 320.15 | 13279      | 1.08       |        |          |              |
| 2 | 277.10 | 48769      | 3.95       |        |          |              | 8  | 338.15 | 102768     | 8.33       |        |          |              |
| 3 | 297.10 | 1233911    | 100.00     |        |          |              | 9  | 339.10 | 19654      | 1.59       |        |          |              |
| 4 | 298.10 | 244714     | 19.83      |        |          |              | 10 | 360.15 | 210847     | 17.09      |        |          |              |
| 5 | 299.15 | 20673      | 1.68       |        |          |              | 11 | 361.15 | 29914      | 2.42       |        |          |              |
| 6 | 319.15 | 65083      | 5.27       |        |          |              | 12 | 615.30 | 21819      | 1.77       |        |          |              |

Figure S77. LCMS spectrum of compound **28**.

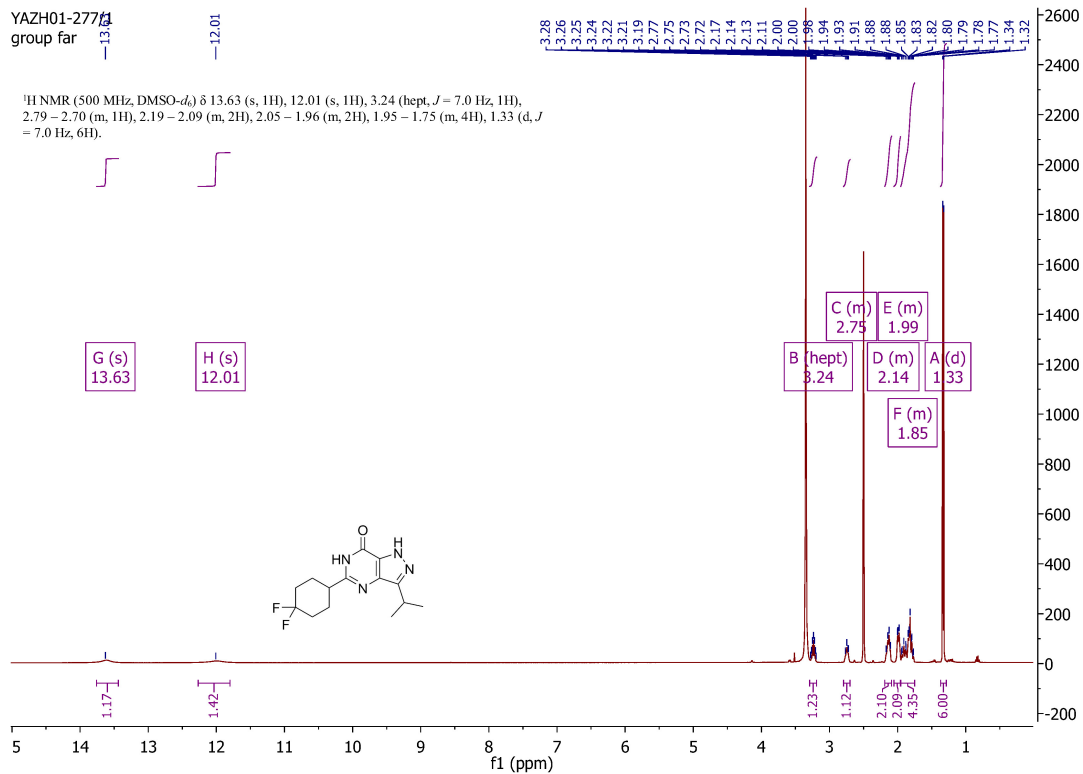

Figure S78. <sup>1</sup>H NMR spectrum of compound **28**.

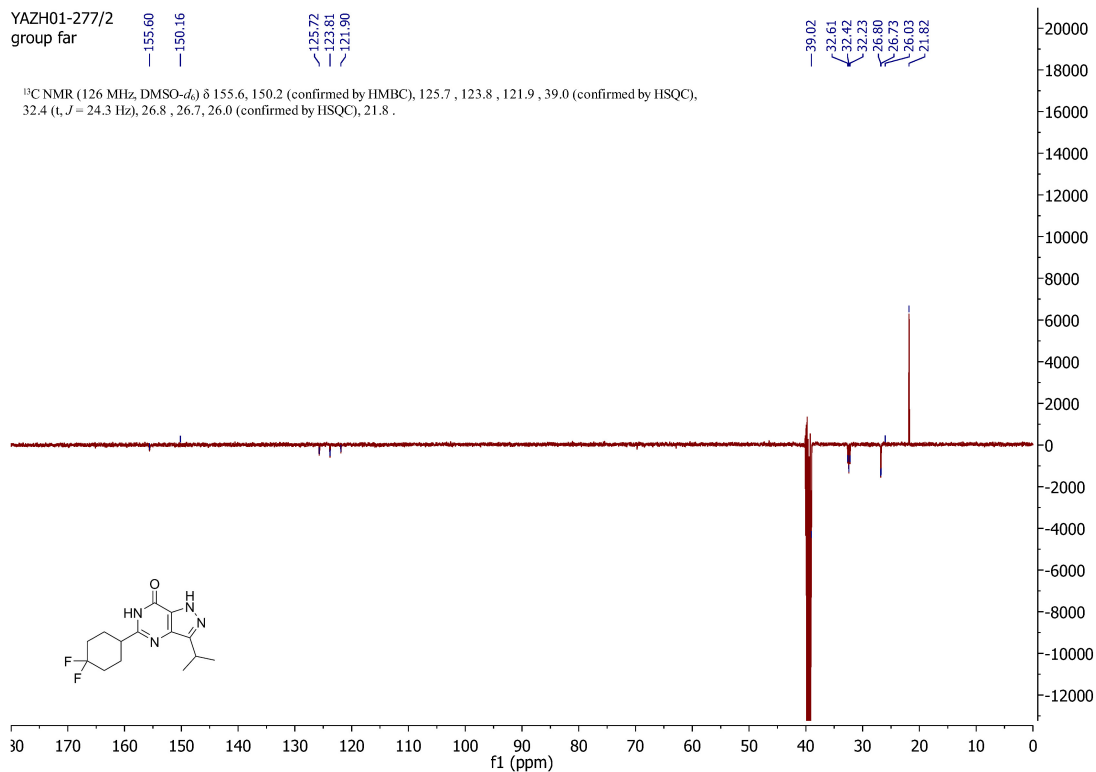

Figure S79. <sup>13</sup>C NMR spectrum of compound **28**.

Acquired by : Admin  
 Date Acquired : 8/11/2018 10:48:39 AM  
 Sample Name : YAZH01-278  
 Sample ID :  
 Tray# : 1  
 Vial# : 15  
 Injection Volume : 5  
 Data File : C:\LabSolutions\Data\2018\2018-wk45\YAZH01-278.lcd  
 Background File : blanco 08112018.lcd  
 Method File : Method SCAN ACID standard.lcm  
 Report Format : DefaultLCMS.lcr  
 Tuning File : C:\LabSolutions\Tuning\Tuning-ESI-pos-neg01072015a.lct  
 Processed by : Admin  
 Modified Date : 8/11/2018 12:52:21 PM

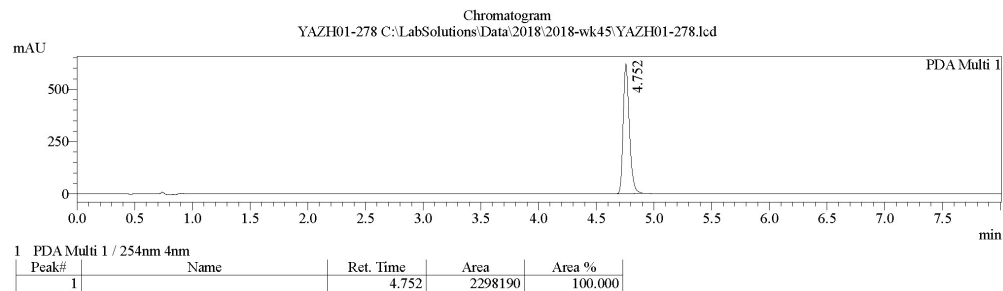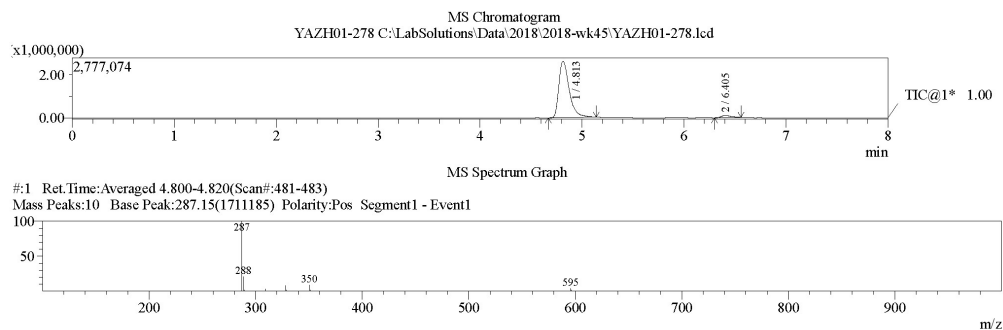

MS Spectrum Table

#1 Ret.Time:  
 BG Mode:Calc 4.670<>5.140(468<>515)  
 Mass Peaks:10 Base Peak:287.15(1711185) Polarity:Pos Segment1 - Event1

| # | m/z    | Abs.Inten. | Rel.Inten. | Charge | Polarity | Monoisotopic | #  | m/z    | Abs.Inten. | Rel.Inten. | Charge | Polarity | Monoisotopic |
|---|--------|------------|------------|--------|----------|--------------|----|--------|------------|------------|--------|----------|--------------|
| 1 | 287.15 | 1711185    | 100.00     |        |          |              | 6  | 329.10 | 31704      | 1.85       |        |          |              |
| 2 | 288.15 | 355026     | 20.75      |        |          |              | 7  | 350.20 | 150225     | 8.78       |        |          |              |
| 3 | 289.15 | 32716      | 1.91       |        |          |              | 8  | 351.15 | 30744      | 1.80       |        |          |              |
| 4 | 309.10 | 48299      | 2.82       |        |          |              | 9  | 595.40 | 70389      | 4.11       |        |          |              |
| 5 | 328.20 | 142971     | 8.36       |        |          |              | 10 | 596.35 | 26376      | 1.54       |        |          |              |

Figure S80. LCMS spectrum of compound **29**.

YAZH01-278/1  
group far

$^1\text{H}$  NMR (500 MHz,  $\text{DMSO}-d_6$ )  $\delta$  3.22 (hept,  $J = 7.0$  Hz, 1H), 1.88 – 1.81 (m, 6H), 1.67 – 1.62 (m, 1H), 1.62 – 1.55 (m, 6H), 1.34 (d,  $J = 7.0$  Hz, 6H).

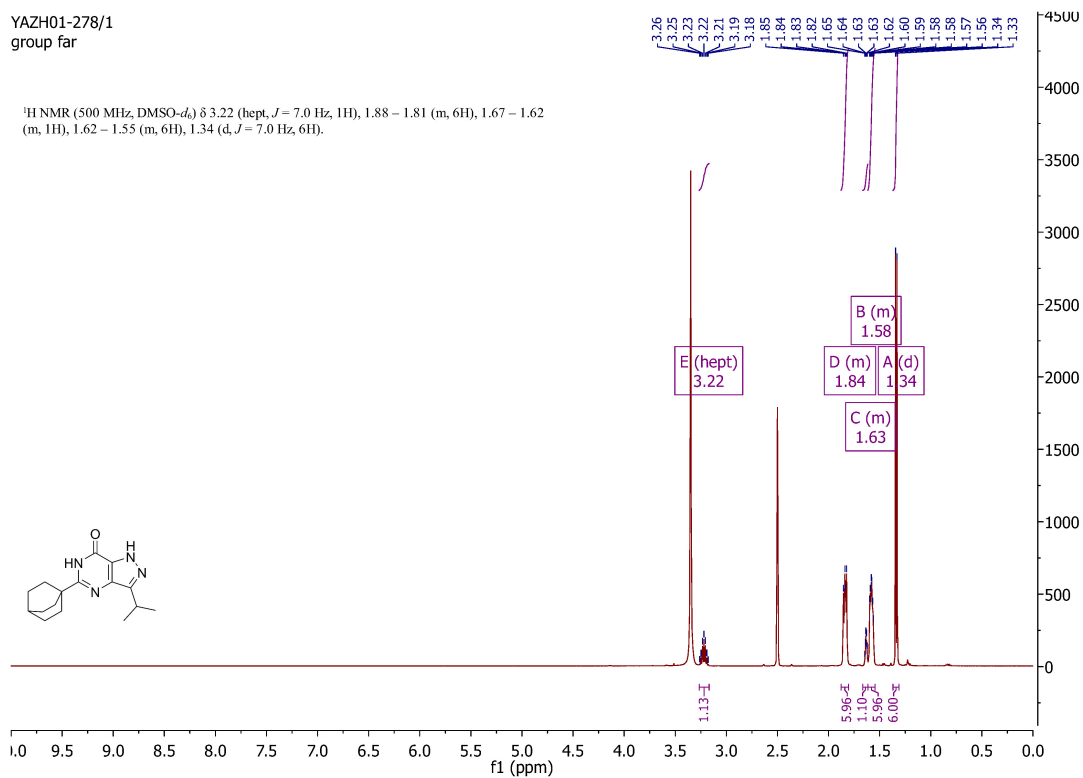

Figure S81.  $^1\text{H}$  NMR spectrum of compound **29**.

YAZH01-278/2  
group far

$^{13}\text{C}$  NMR (126 MHz,  $\text{DMSO}$ )  $\delta$  159.4, 150.1, 136.3, 37.0, 28.9, 26.4, 25.8, 24.0, 22.2.

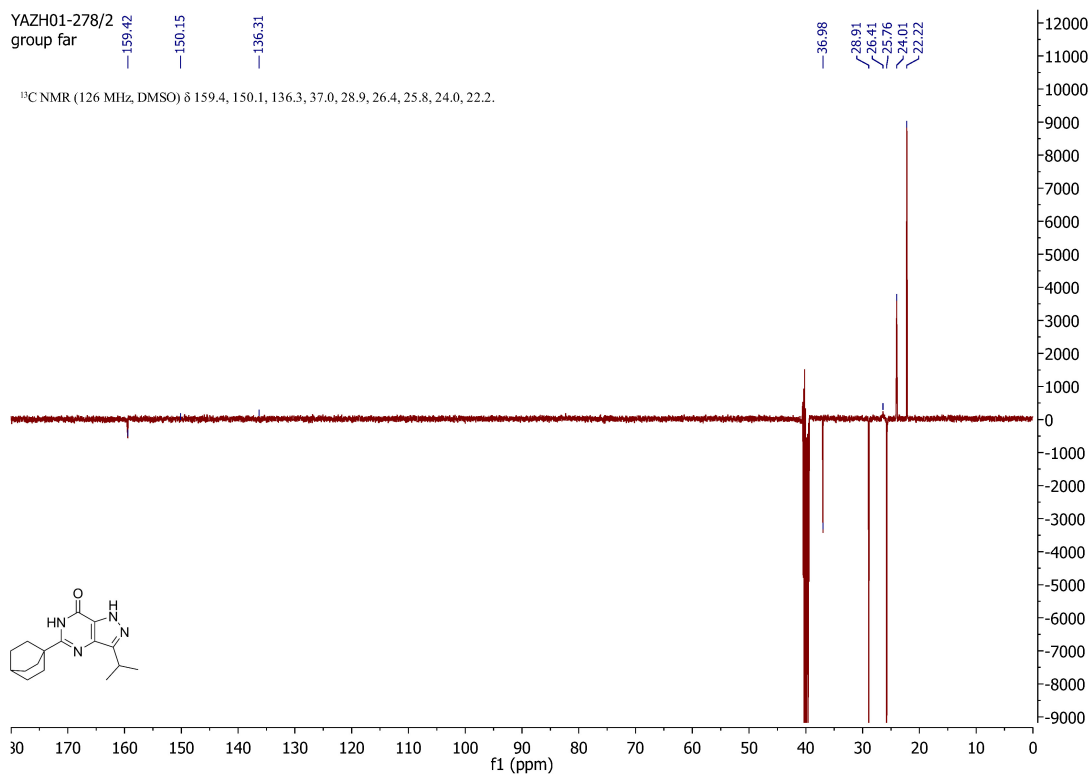

Figure S82.  $^{13}\text{C}$  NMR spectrum of compound **29**.

Acquired by : Admin  
Date Acquired : 8/11/2018 10:57:20 AM  
Sample Name : YAZH01-279  
Sample ID :  
Tray# : 1  
Vial# : 16  
Injection Volume : 5  
Data File : C:\LabSolutions\Data\2018\2018-wk45\YAZH01-279.lcd  
Background File : blanco 08112018.lcd  
Method File : Method SCAN ACID standard.lcm  
Report Format : DefaultLCMS.lcr  
Tuning File : C:\LabSolutions\Tuning\Tuning-ESI-pos-neg01072015a.lct  
Processed by : Admin  
Modified Date : 8/11/2018 12:53:33 PM

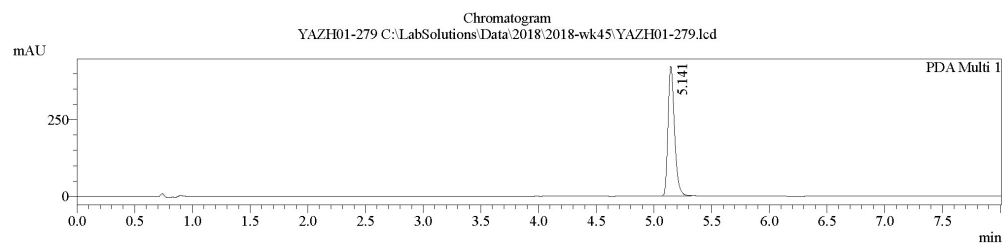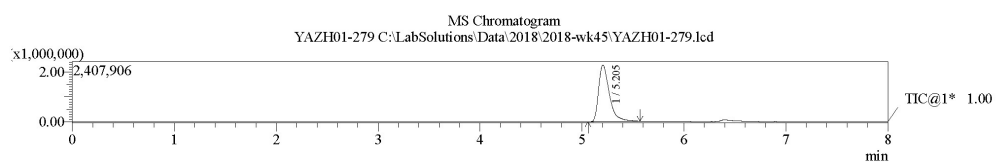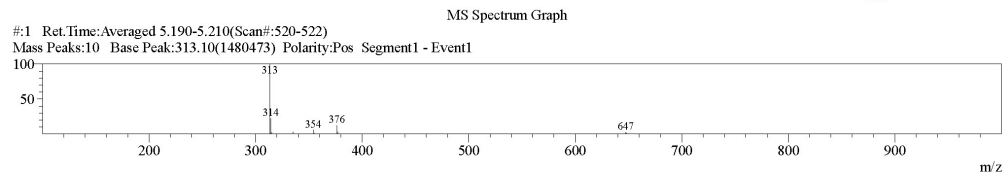

MS Spectrum Table

#1 Ret.Time:  
BG Mode:Calc 5.060<->5.570(507<->558)

| # | m/z    | Abs.Inten. | Rel.Inten. | Charge | Polarity | Monoisotopic | #  | m/z    | Abs.Inten. | Rel.Inten. | Charge | Polarity | Monoisotopic |
|---|--------|------------|------------|--------|----------|--------------|----|--------|------------|------------|--------|----------|--------------|
| 1 | 313.10 | 1480473    | 100.00     |        |          |              | 6  | 355.20 | 18518      | 1.25       |        |          |              |
| 2 | 314.15 | 325362     | 21.98      |        |          |              | 7  | 376.20 | 185578     | 12.54      |        |          |              |
| 3 | 315.20 | 34953      | 2.36       |        |          |              | 8  | 377.20 | 42025      | 2.84       |        |          |              |
| 4 | 335.20 | 50531      | 3.41       |        |          |              | 9  | 647.45 | 38316      | 2.59       |        |          |              |
| 5 | 354.20 | 83713      | 5.65       |        |          |              | 10 | 648.40 | 24151      | 1.63       |        |          |              |

Figure S83. LCMS spectrum of compound **30**.



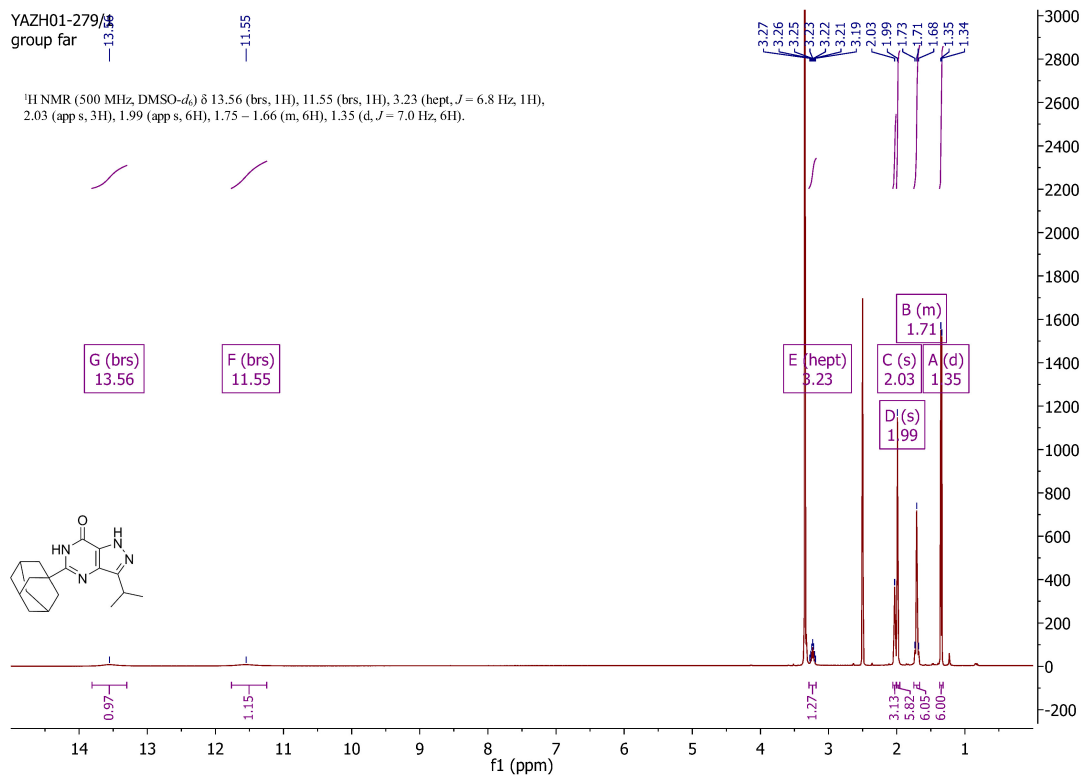

Figure S84. <sup>1</sup>H NMR spectrum of compound **30**.

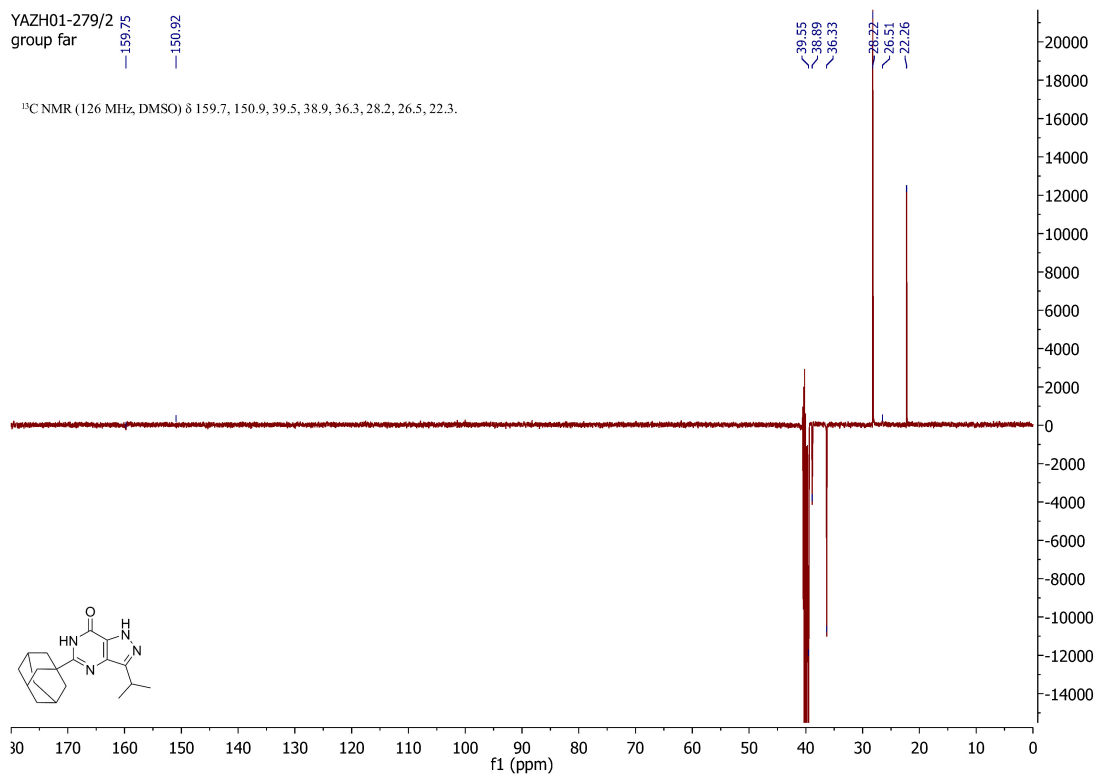

Figure S85. <sup>13</sup>C NMR spectrum of compound **30**.

Acquired by : Admin  
 Date Acquired : 20/12/2018 12:19:58 PM  
 Sample Name : YAZH01-288-1  
 Sample ID :  
 Tray# : 1  
 Vial# : 8  
 Injection Volume : 5  
 Data File : C:\LabSolutions\Data\2018\2018-wk51\YAZH01-288-1.lcd  
 Background File : blanco 20122018.lcd  
 Method File : Method SCAN ACID standard.lcm  
 Report Format : DefaultLCMS.lcr  
 Tuning File : C:\LabSolutions\Tuning\Tuning-ESI-pos-neg01072015a.lct  
 Processed by : Admin  
 Modified Date : 20/12/2018 2:52:13 PM

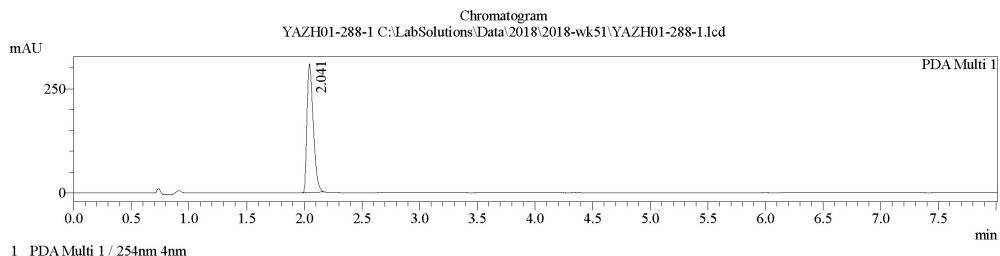

PeakTabl

| Peak# | Name | Ret. Time | Area    | Area %  |
|-------|------|-----------|---------|---------|
| 1     |      | 2.041     | 1163945 | 100.000 |

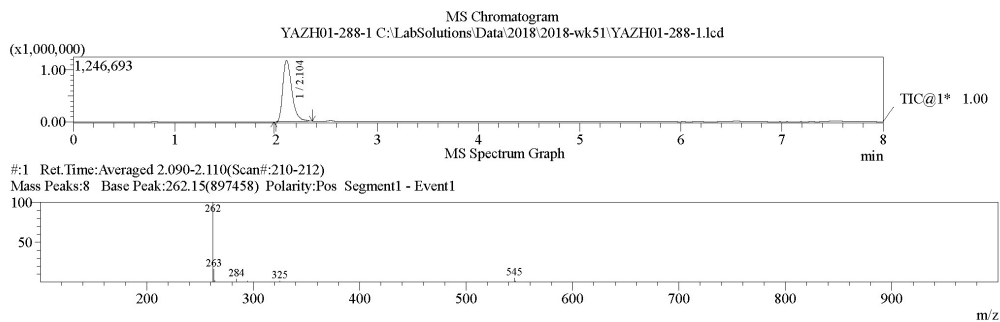

MS Spectrum Table

#1 Ret.Time:  
BG Mode:Calc 1.980<->2.360(199<->237)

| # | m/z    | Abs.Inten. | Rel.Inten. | Charge | Polarity | Monoisotopic | # | m/z    | Abs.Inten. | Rel.Inten. | Charge | Polarity | Monoisotopic |
|---|--------|------------|------------|--------|----------|--------------|---|--------|------------|------------|--------|----------|--------------|
| 1 | 262.15 | 897458     | 100.00     |        |          |              | 5 | 294.20 | 11406      | 1.27       |        |          |              |
| 2 | 263.15 | 145492     | 16.21      |        |          |              | 6 | 325.10 | 13609      | 1.52       |        |          |              |
| 3 | 264.10 | 16532      | 1.84       |        |          |              | 7 | 545.35 | 45979      | 5.12       |        |          |              |
| 4 | 284.15 | 36952      | 4.12       |        |          |              | 8 | 546.30 | 14333      | 1.60       |        |          |              |

Figure S86. LCMS spectrum of compound **32**.

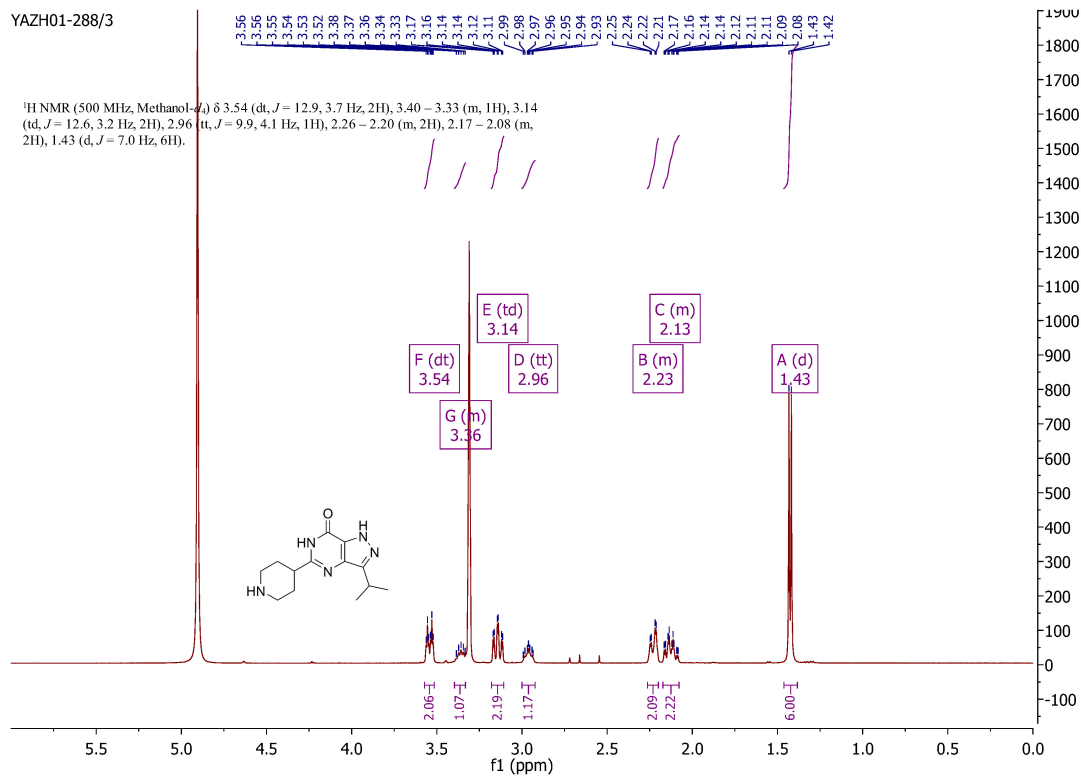

Figure S87. <sup>1</sup>H NMR spectrum of compound **32**.

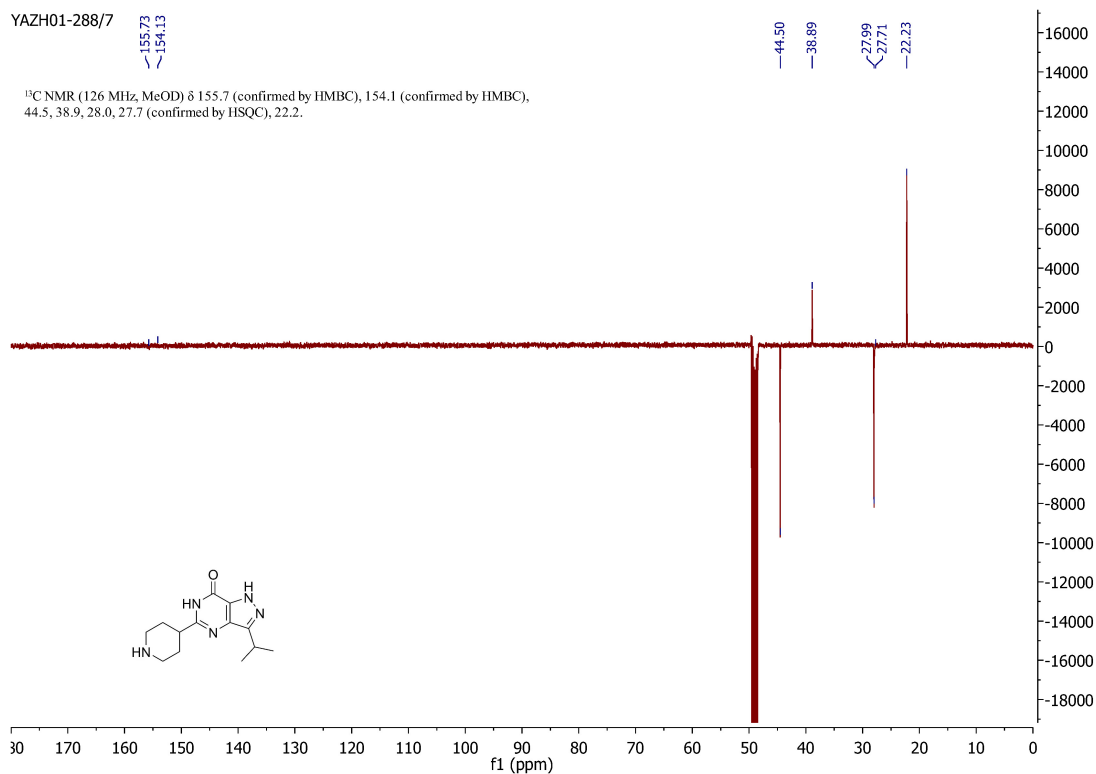

Figure S88. <sup>13</sup>C NMR spectrum of compound **32**.

Acquired by : Admin  
 Date Acquired : 3/9/2018 2:19:49 PM  
 Sample Name : YAZH01-248-1  
 Sample ID :  
 Tray# : 1  
 Vial# : 13  
 Injection Volume : 1  
 Data File : C:\LabSolutions\Data\2018\2018-wk36\YAZH01-248-1.lcd  
 Background File : blanco 03092018.lcd  
 Method File : Method SCAN ACID standard MW501cm  
 Report Format : DefaultLCMS.lcr  
 Tuning File : C:\LabSolutions\Tuning\Tuning-ESI-pos-neg01072015a.lct  
 Processed by : Admin  
 Modified Date : 3/9/2018 2:52:36 PM

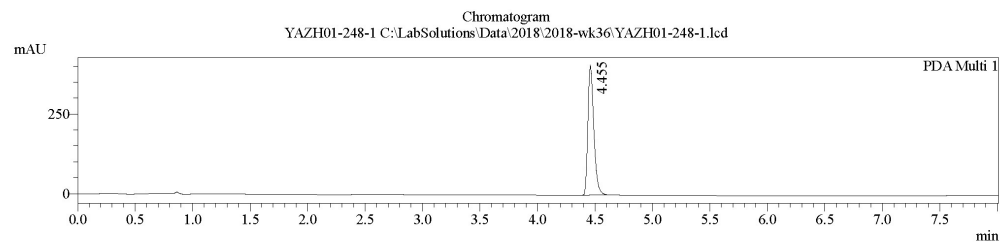

1 PDA Multi 1 / 254nm 4nm

| Peak# | Name | Ret. Time | Area    | Area %  |
|-------|------|-----------|---------|---------|
| 1     |      | 4.455     | 1443459 | 100.000 |

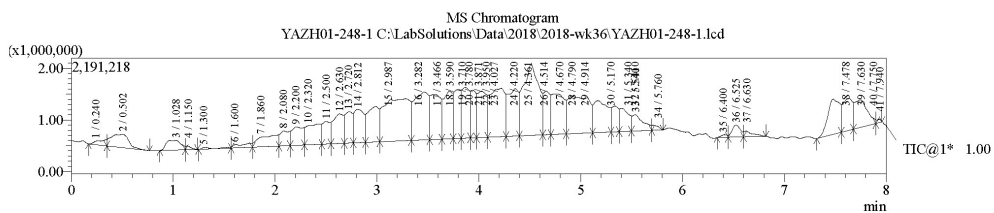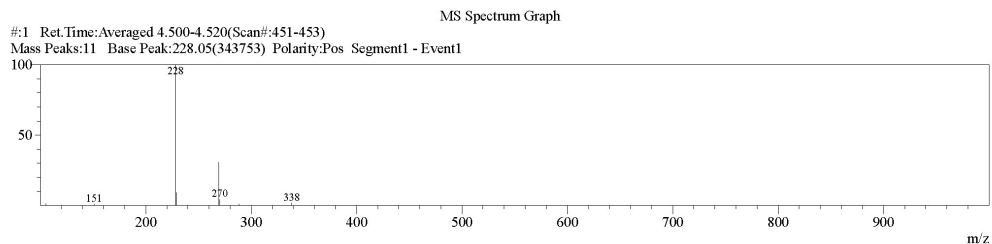

MS Spectrum Table

#1 Ret.Time:  
 BG Mode:Calc 4.400<>4.630(441<>464)

| # | m/z    | Abs.Inten. | Rel.Inten. | Charge | Polarity | Monoisotopic | #  | m/z    | Abs.Inten. | Rel.Inten. | Charge | Polarity | Monoisotopic |
|---|--------|------------|------------|--------|----------|--------------|----|--------|------------|------------|--------|----------|--------------|
| 1 | 59.05  | 9624       | 2.80       |        |          |              | 7  | 229.05 | 31162      | 9.07       |        |          |              |
| 2 | 83.05  | 95735      | 27.85      |        |          |              | 8  | 269.15 | 106700     | 31.04      |        |          |              |
| 3 | 84.05  | 3885       | 1.13       |        |          |              | 9  | 270.15 | 15272      | 4.44       |        |          |              |
| 4 | 105.05 | 5189       | 1.51       |        |          |              | 10 | 288.30 | 3630       | 1.06       |        |          |              |
| 5 | 151.00 | 3535       | 1.03       |        |          |              | 11 | 338.30 | 5872       | 1.71       |        |          |              |
| 6 | 228.05 | 343753     | 100.00     |        |          |              |    |        |            |            |        |          |              |

Figure S89. LCMS spectrum of compound **34a**.

YAZH01-248-1/7

$^1\text{H}$  NMR (600 MHz, Chloroform- $d$ )  $\delta$  3.98 (s, 3H), 3.96 (s, 3H), 3.43 (hept,  $J = 7.1$  Hz, 1H), 1.30 (d,  $J = 6.9$  Hz, 6H).

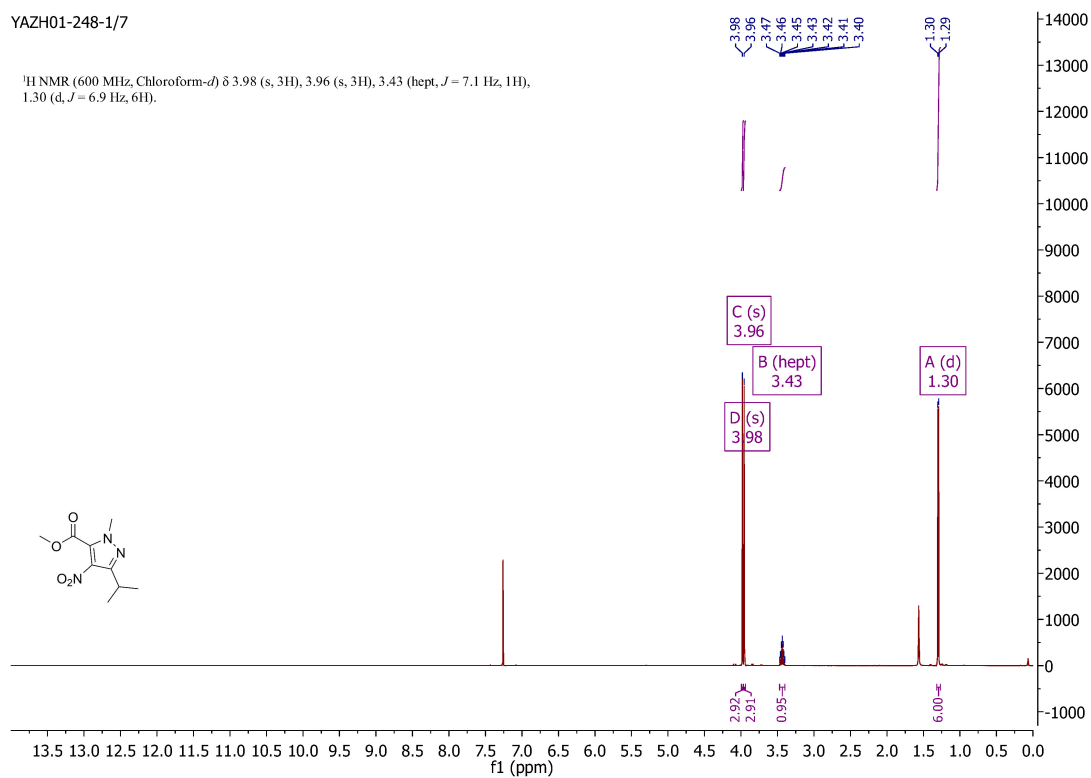

Figure S90.  $^1\text{H}$  NMR spectrum of compound 34a.

YAZH01-248-1/8

$^{13}\text{C}$  NMR (151 MHz,  $\text{CDCl}_3$ )  $\delta$  159.3, 153.3, 132.1, 131.9, 53.7, 39.2, 26.5, 21.5.

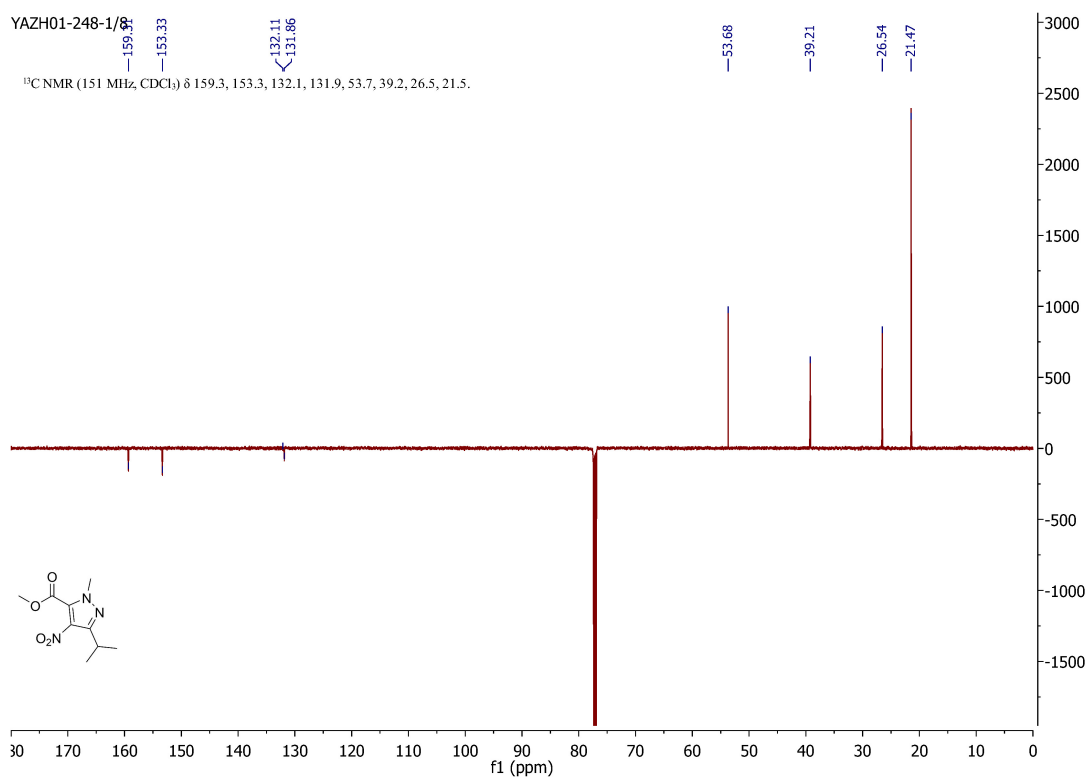

Figure S91.  $^{13}\text{C}$  NMR spectrum of compound 34a.

Acquired by : Admin  
 Date Acquired : 3/9/2018 2:38:23 PM  
 Sample Name : YAZH01-248-2  
 Sample ID :  
 Tray# : 1  
 Vial# : 14  
 Injection Volume : 1  
 Data File : C:\LabSolutions\Data\2018\2018-wk36\YAZH01-248-2.lcd  
 Background File : blanco 03092018.lcd  
 Method File : Method SCAN ACID standard MW50.lcm  
 Report Format : DefaultLCMS.lcr  
 Tuning File : C:\LabSolutions\Tuning\Tuning-ESI-pos-neg01072015a.lct  
 Processed by : Admin  
 Modified Date : 3/9/2018 2:53:35 PM

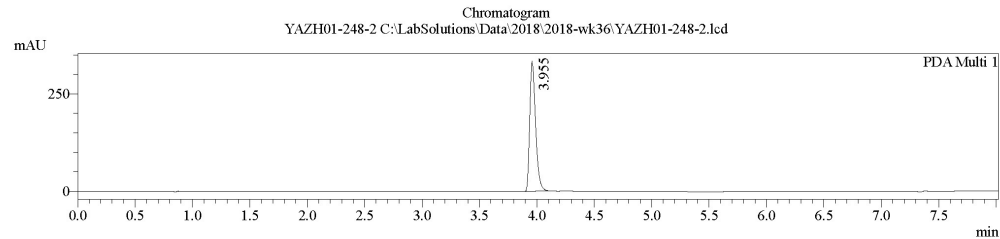

| Peak# | Name | Ret. Time | Area    | Area %  |
|-------|------|-----------|---------|---------|
| 1     |      | 3.955     | 1168339 | 100.000 |

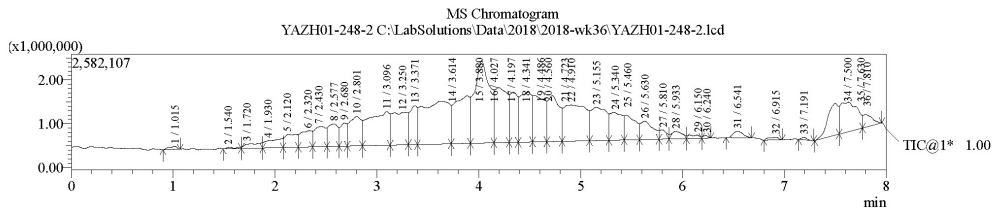

MS Spectrum Graph

#1 Ret.Time:Averaged 4.020-4.040(Scan#:403-405)  
Mass Peaks:17 Base Peak:228.05(435416) Polarity:Pos Segment1 - Event1

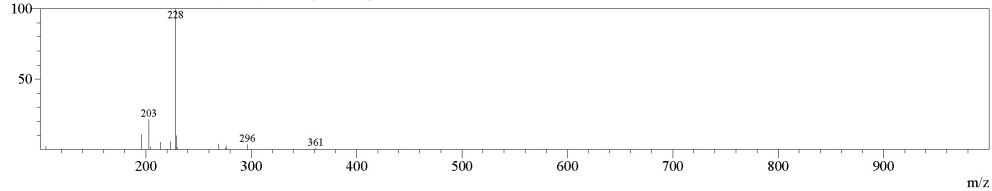

MS Spectrum Table

#1 Ret.Time:  
BG Mode:Calc 3.920<->4.150(393<->416)  
Mass Peaks:17 Base Peak:228.05(435416) Polarity:Pos Segment1 - Event1

| # | m/z    | Abs.Inten. | Rel.Inten. | Charge | Polarity | Monoisotopic | #  | m/z    | Abs.Inten. | Rel.Inten. | Charge | Polarity | Monoisotopic |
|---|--------|------------|------------|--------|----------|--------------|----|--------|------------|------------|--------|----------|--------------|
| 1 | 59.05  | 11139      | 2.56       |        |          |              | 10 | 228.05 | 435416     | 100.00     |        |          |              |
| 2 | 83.05  | 30697      | 7.05       |        |          |              | 11 | 229.10 | 43077      | 9.89       |        |          |              |
| 3 | 105.05 | 10233      | 2.35       |        |          |              | 12 | 230.05 | 7305       | 1.68       |        |          |              |
| 4 | 196.00 | 47038      | 10.80      |        |          |              | 13 | 269.15 | 17962      | 4.13       |        |          |              |
| 5 | 203.00 | 93195      | 21.40      |        |          |              | 14 | 275.50 | 4931       | 1.13       |        |          |              |
| 6 | 204.20 | 8468       | 1.94       |        |          |              | 15 | 276.10 | 10672      | 2.45       |        |          |              |
| 7 | 214.10 | 23006      | 5.28       |        |          |              | 16 | 296.10 | 15696      | 3.60       |        |          |              |
| 8 | 223.50 | 18131      | 4.16       |        |          |              | 17 | 361.10 | 4417       | 1.01       |        |          |              |
| 9 | 223.60 | 24965      | 5.73       |        |          |              |    |        |            |            |        |          |              |

Figure S92. LCMS spectrum of compound **34b**.

YAZH01-248-2/1

$^1\text{H}$  NMR (600 MHz, Chloroform- $d$ )  $\delta$  3.94 (s, 3H), 3.94 (s, 3H), 3.48 (hept,  $J = 7.2$  Hz, 1H), 1.40 (d,  $J = 7.2$  Hz, 6H).

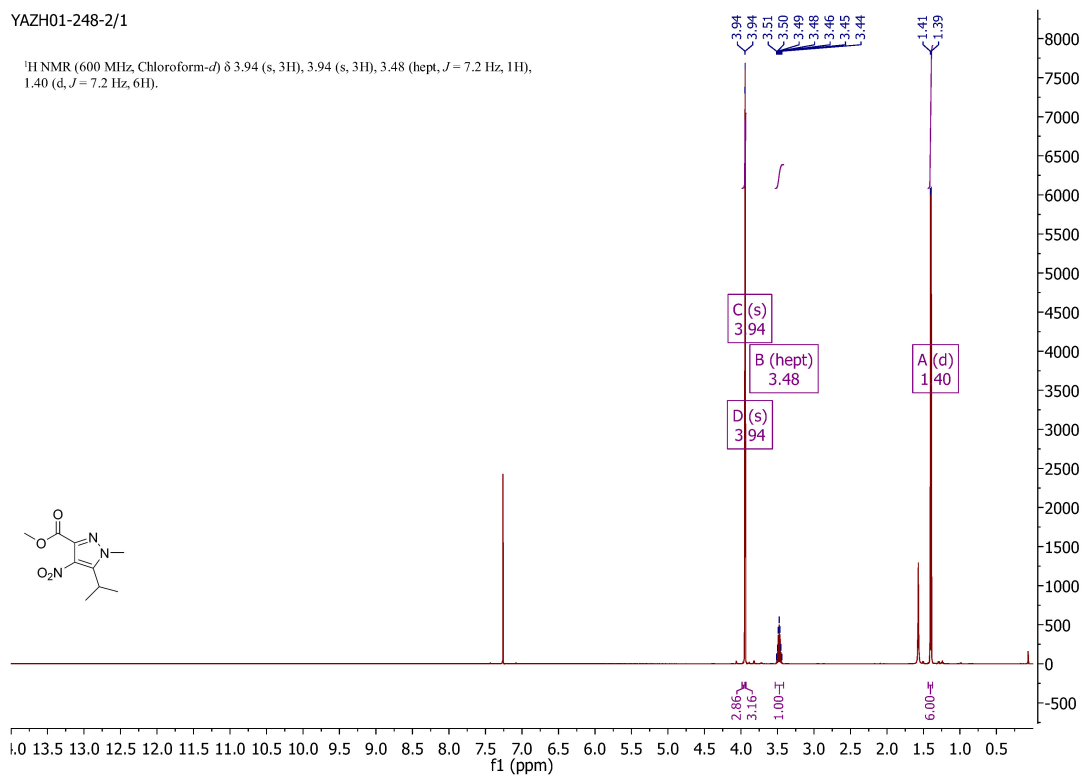

Figure S93.  $^1\text{H}$  NMR spectrum of compound **34b**.

YAZH01-248-2/2

$^{13}\text{C}$  NMR (151 MHz,  $\text{CDCl}_3$ )  $\delta$  160.8, 146.3, 137.4, 132.1, 53.1, 39.1, 25.8, 19.4.

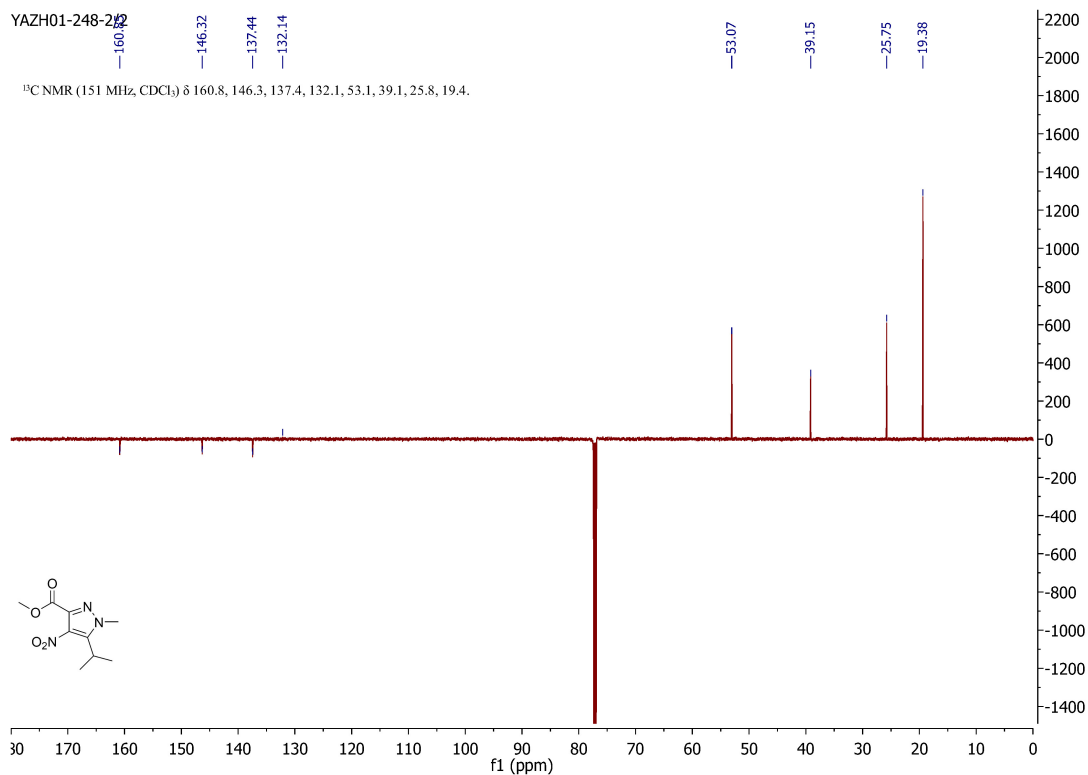

Figure S94.  $^{13}\text{C}$  NMR spectrum of compound **34b**.

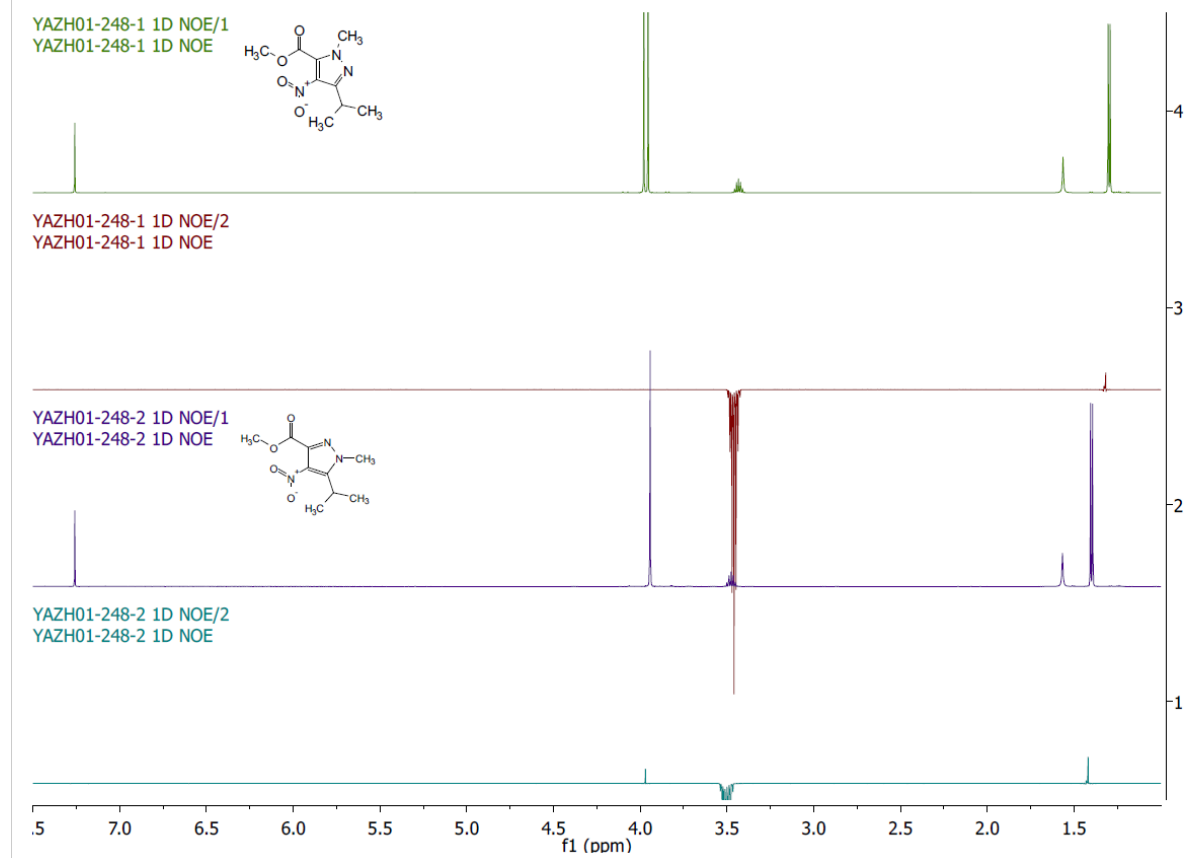

Figure S95. 1D NOESY spectrum of compound **34a/34b**.



Acquired by : Admin  
 Date Acquired : 13/9/2018 4:39:27 PM  
 Sample Name : YAZH01-257  
 Sample ID :  
 Tray# : 1  
 Vial# : 27  
 Injection Volume : 1  
 Data File : C:\LabSolutions\Data\2018\2018-wk37\YAZH01-257.lcd  
 Background File : blanco 13092018.lcd  
 Method File : Method SCAN ACID standard MW100.lcm  
 Report Format : DefaultLCMS.lcr  
 Tuning File : C:\LabSolutions\Tuning\Tuning-ESI-pos-neg01072015a.lct  
 Processed by : Admin  
 Modified Date : 13/9/2018 5:21:56 PM

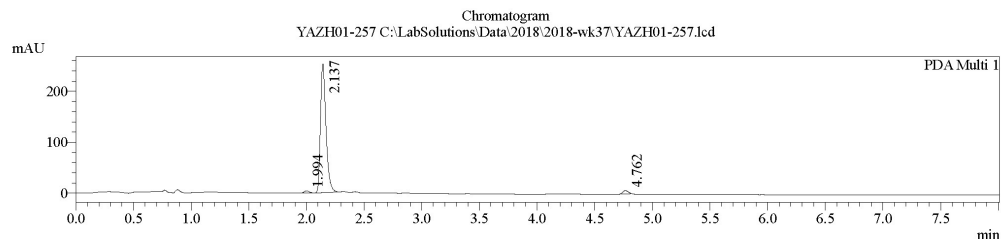

| Peak# | Name | Ret. Time | Area   | Area % |
|-------|------|-----------|--------|--------|
| 1     |      | 1.994     | 10665  | 1.228  |
| 2     |      | 2.137     | 838126 | 96.509 |
| 3     |      | 4.762     | 19653  | 2.263  |

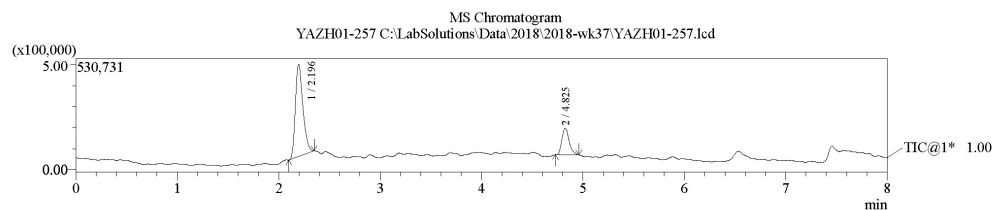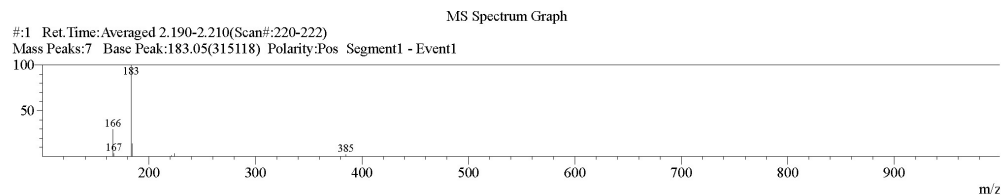

MS Spectrum Table

#1 Ret.Time:  
BG Mode:Calc 2.100<->2.350(211<->236)

| # | m/z    | Abs.Inten. | Rel.Inten. | Charge | Polarity | Monoisotopic | # | m/z    | Abs.Inten. | Rel.Inten. | Charge | Polarity | Monoisotopic |
|---|--------|------------|------------|--------|----------|--------------|---|--------|------------|------------|--------|----------|--------------|
| 1 | 166.00 | 92920      | 29.49      |        |          |              | 5 | 221.10 | 3883       | 1.23       |        |          |              |
| 2 | 167.10 | 9564       | 3.04       |        |          |              | 6 | 224.05 | 9755       | 3.10       |        |          |              |
| 3 | 183.05 | 315118     | 100.00     |        |          |              | 7 | 385.15 | 6722       | 2.13       |        |          |              |
| 4 | 184.05 | 44037      | 13.97      |        |          |              |   |        |            |            |        |          |              |

Figure S96. LCMS spectrum of compound **36a**.

YAZH01-257/1

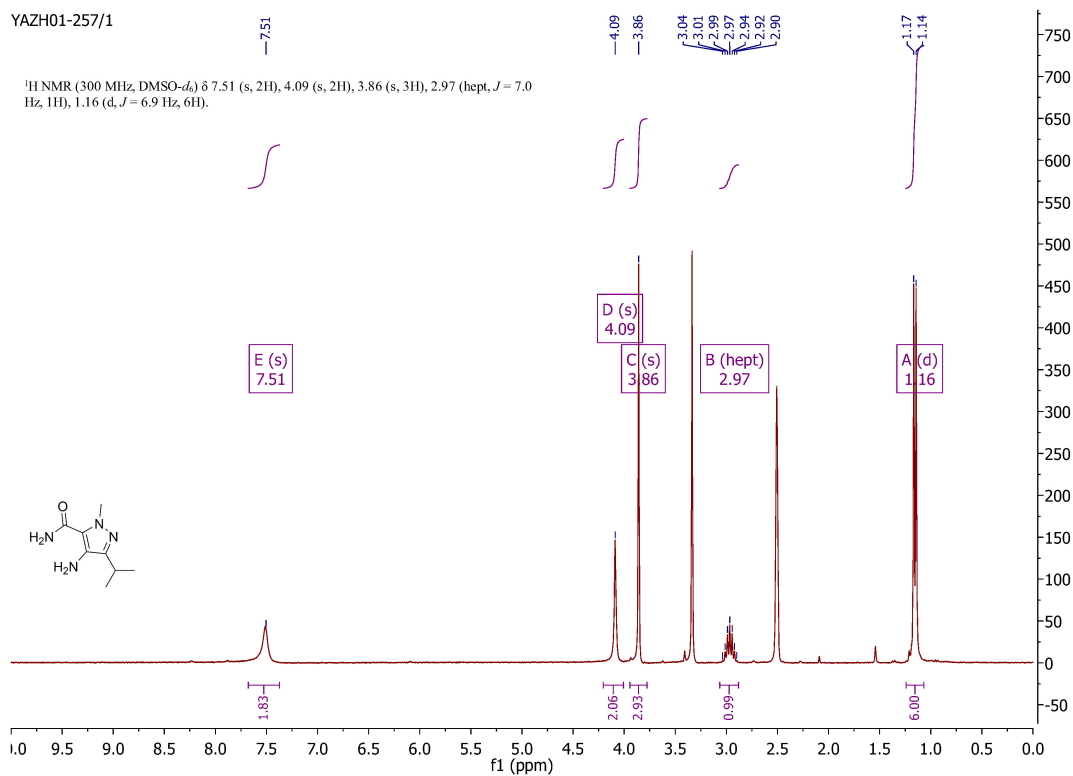

Figure S97. <sup>1</sup>H NMR spectrum of compound **36a**.

YAZH01-254/8

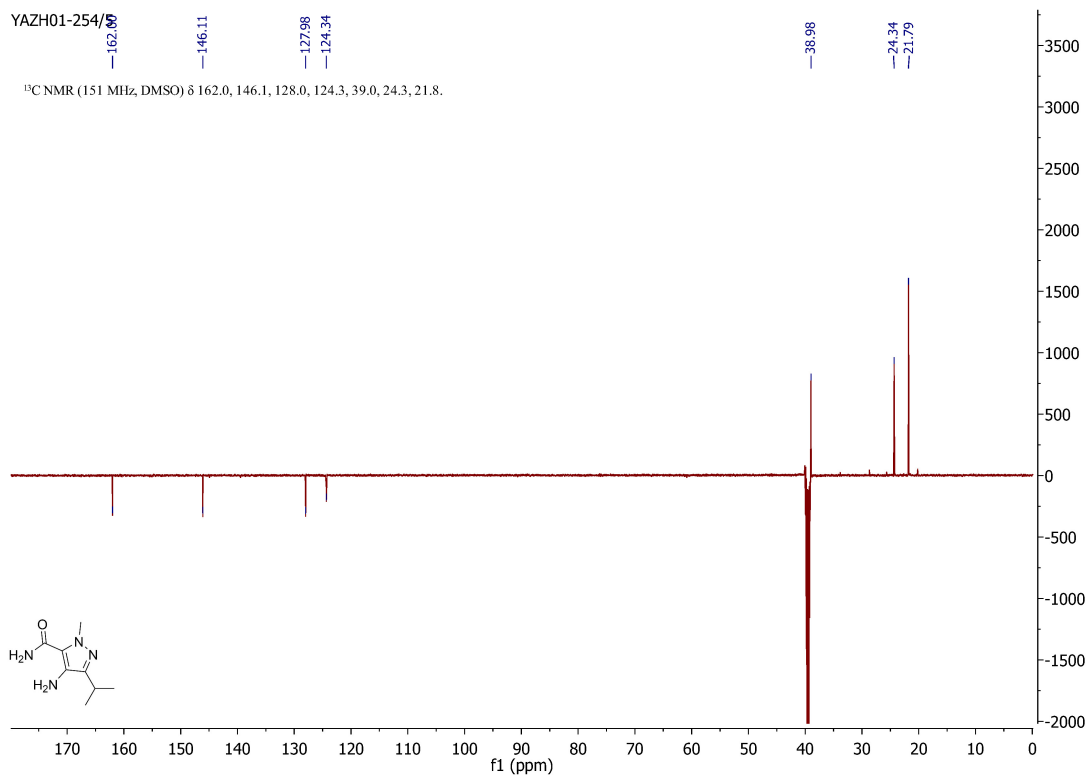

Figure S98. <sup>13</sup>C NMR spectrum of compound **36a**.

Acquired by : Admin  
 Date Acquired : 13/9/2018 4:48:05 PM  
 Sample Name : YAZH01-258  
 Sample ID :  
 Tray# : 1  
 Vial# : 28  
 Injection Volume : 1  
 Data File : C:\LabSolutions\Data\2018\2018-wk37\YAZH01-258.lcd  
 Background File : blanco 13092018.lcd  
 Method File : Method SCAN ACID standard MW100.lcm  
 Report Format : DefaultL.CMS.lcr  
 Tuning File : C:\LabSolutions\Tuning\Tuning-ESI-pos-neg01072015a.lct  
 Processed by : Admin  
 Modified Date : 13/9/2018 5:22:57 PM

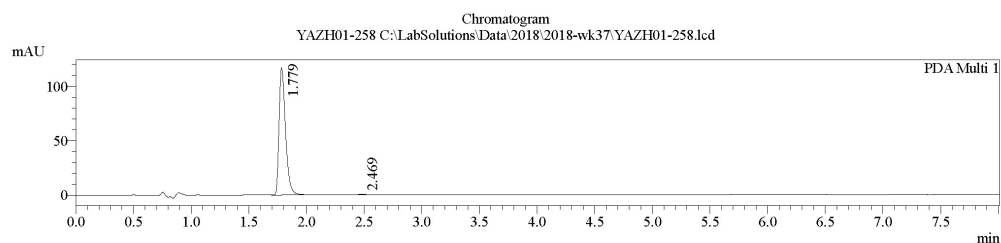

| Peak# | Name | Ret. Time | Area   | Area % |
|-------|------|-----------|--------|--------|
| 1     |      | 1.779     | 453050 | 99.404 |
| 2     |      | 2.469     | 2715   | 0.596  |

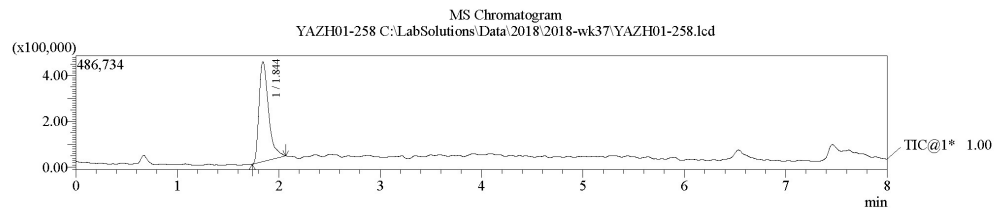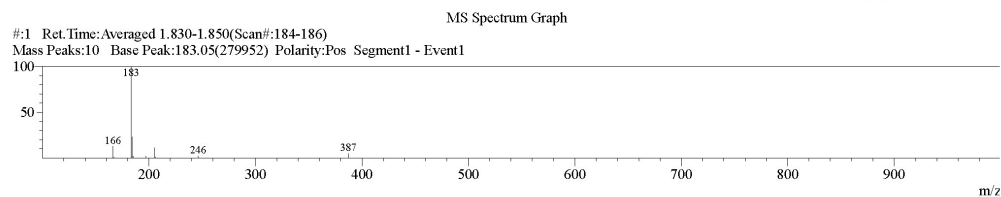

MS Spectrum Table

#1 Ret.Time:  
BG Mode:Calc 1.740<->2.070(175<->208)  
Mass Peaks:10 Base Peak:183.05(279952) Polarity:Pos Segment1 - Event1

| # | m/z    | Abs.Inten. | Rel.Inten. | Charge | Polarity | Monoisotopic | #  | m/z    | Abs.Inten. | Rel.Inten. | Charge | Polarity | Monoisotopic |
|---|--------|------------|------------|--------|----------|--------------|----|--------|------------|------------|--------|----------|--------------|
| 1 | 166.10 | 35487      | 12.68      |        |          |              | 6  | 197.00 | 5190       | 1.85       |        |          |              |
| 2 | 167.00 | 3201       | 1.14       |        |          |              | 7  | 205.00 | 31743      | 11.34      |        |          |              |
| 3 | 183.05 | 279952     | 100.00     |        |          |              | 8  | 206.00 | 3173       | 1.13       |        |          |              |
| 4 | 184.05 | 65044      | 23.23      |        |          |              | 9  | 246.10 | 6568       | 2.35       |        |          |              |
| 5 | 185.05 | 5591       | 2.00       |        |          |              | 10 | 387.15 | 13120      | 4.69       |        |          |              |

Figure S99. LCMS spectrum of compound **36b**.

YAZH01-258.1.fid

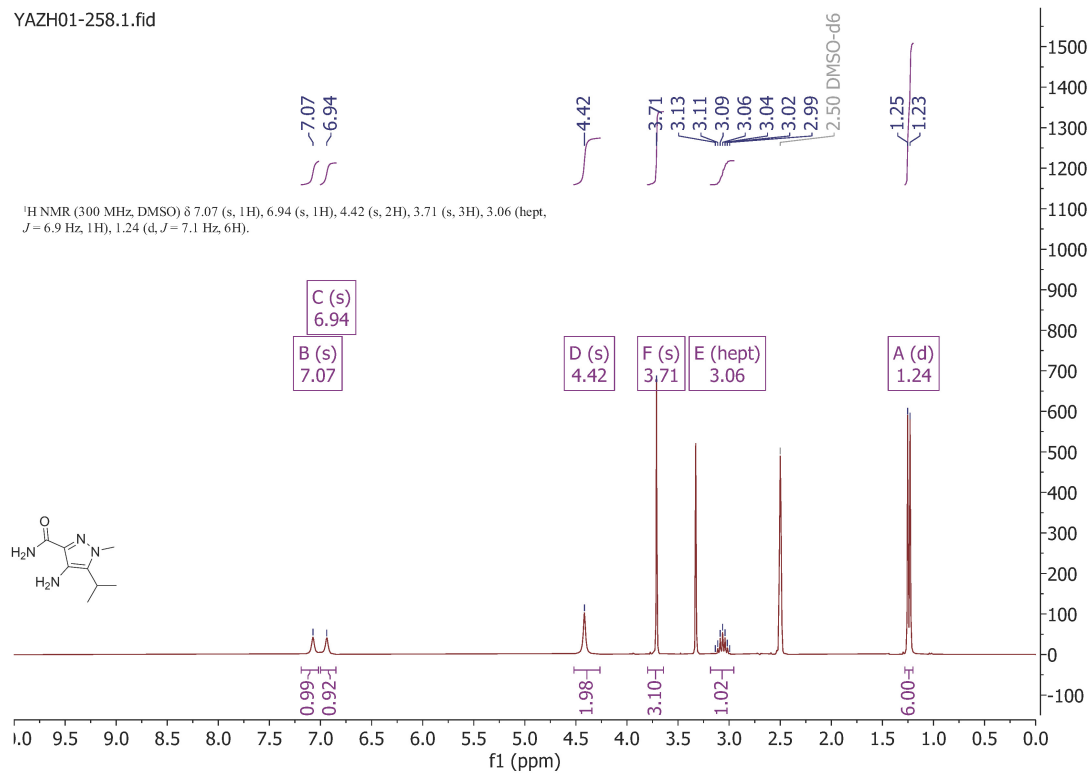

Figure S100. <sup>1</sup>H NMR spectrum of compound **36b**.

YAZH01-258.2

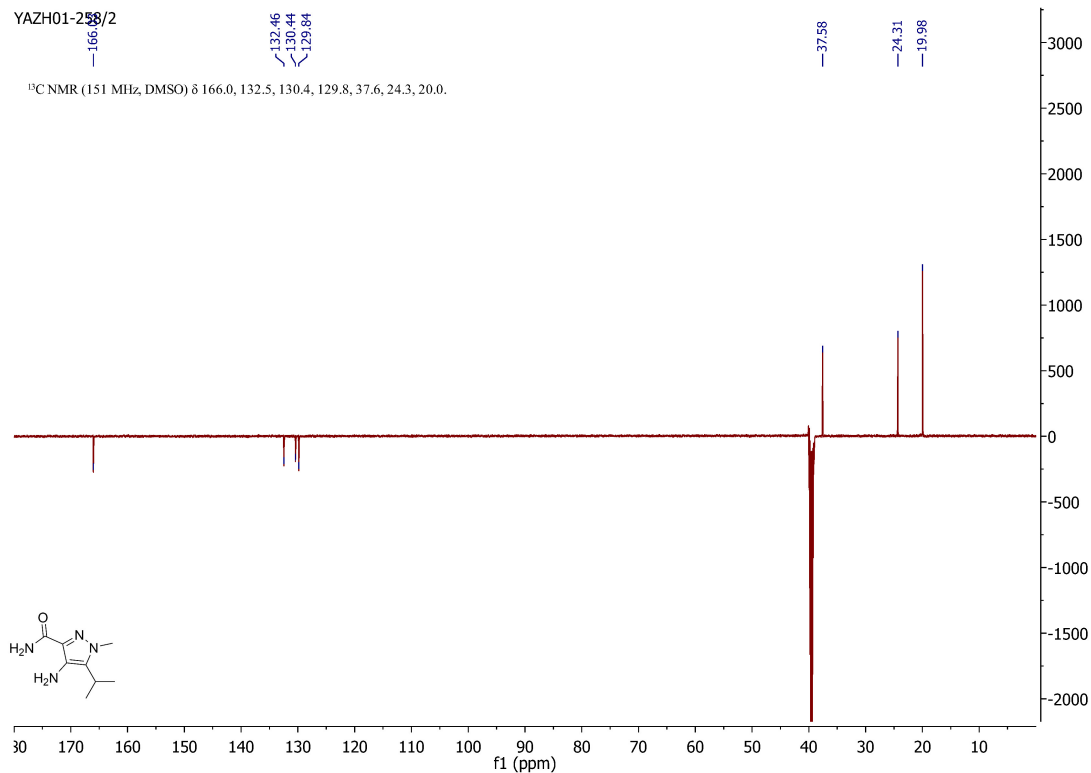

Figure S101. <sup>13</sup>C NMR spectrum of compound **36b**.

Acquired by : Admin  
 Date Acquired : 10/4/2019 11:56:17 AM  
 Sample Name : YAZH\_33  
 Sample ID :  
 Tray# : 1  
 Vial# : 48  
 Injection Volume : 3  
 Data File : C:\LabSolutions\Data\2019\2019-wk15\YAZH\_33.lcd  
 Background File : blanco 10042019.lcd  
 Method File : Method SCAN ACID standard.lcm  
 Report Format : DefaultLCMS.lcr  
 Tuning File : C:\LabSolutions\Tuning\Tuning-ESI-pos-neg01072015a.lct  
 Processed by : Admin  
 Modified Date : 10/4/2019 12:37:23 PM

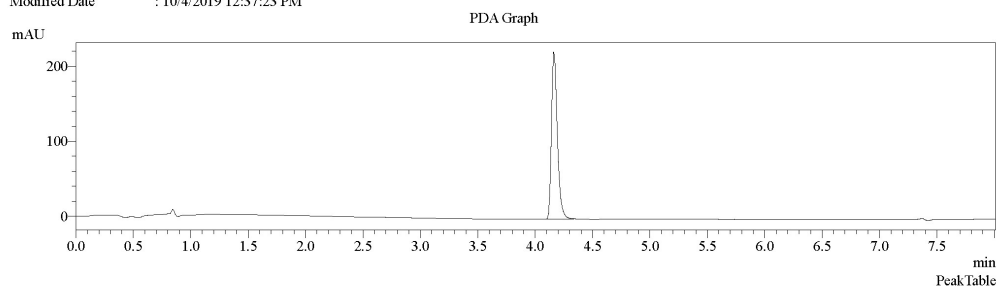

PDA Ch1 254nm 4nm

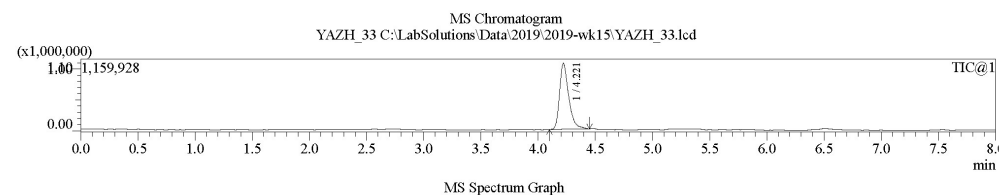

MS Spectrum Graph

#1 Ret.Time:Averaged 4.210-4.230(Scan#:422-424)  
 BG Mode:Calc 4.100<->4.450(411<->446)  
 Mass Peaks:6 Base Peak:283.10(901404) Polarity:Pos Segment1 - Event1

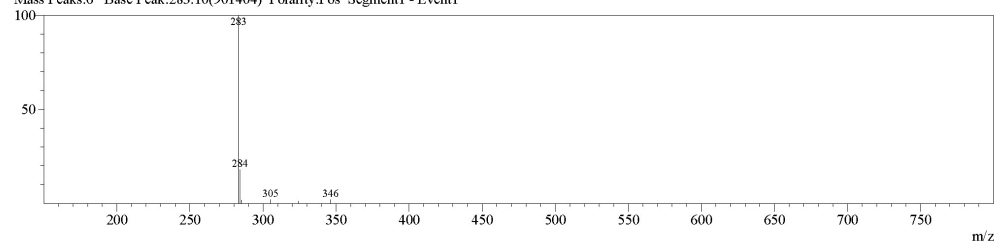

MS Spectrum Table

#1 Ret.Time:  
 BG Mode:Calc 4.100<->4.450(411<->446)  
 Mass Peaks:6 Base Peak:283.10(901404) Polarity:Pos Segment1 - Event1

| # | m/z    | Abs.Inten. | Rel.Inten. | Charge | Polarity | Monoisotopic | # | m/z    | Abs.Inten. | Rel.Inten. | Charge | Polarity | Monoisotopic |
|---|--------|------------|------------|--------|----------|--------------|---|--------|------------|------------|--------|----------|--------------|
| 1 | 283.10 | 901404     | 100.00     |        |          |              | 4 | 305.15 | 17493      | 1.94       |        |          |              |
| 2 | 284.10 | 161921     | 17.96      |        |          |              | 5 | 324.15 | 11299      | 1.25       |        |          |              |
| 3 | 285.20 | 14828      | 1.64       |        |          |              | 6 | 346.15 | 18518      | 2.05       |        |          |              |

Figure S102. LCMS spectrum of compound **37a**.

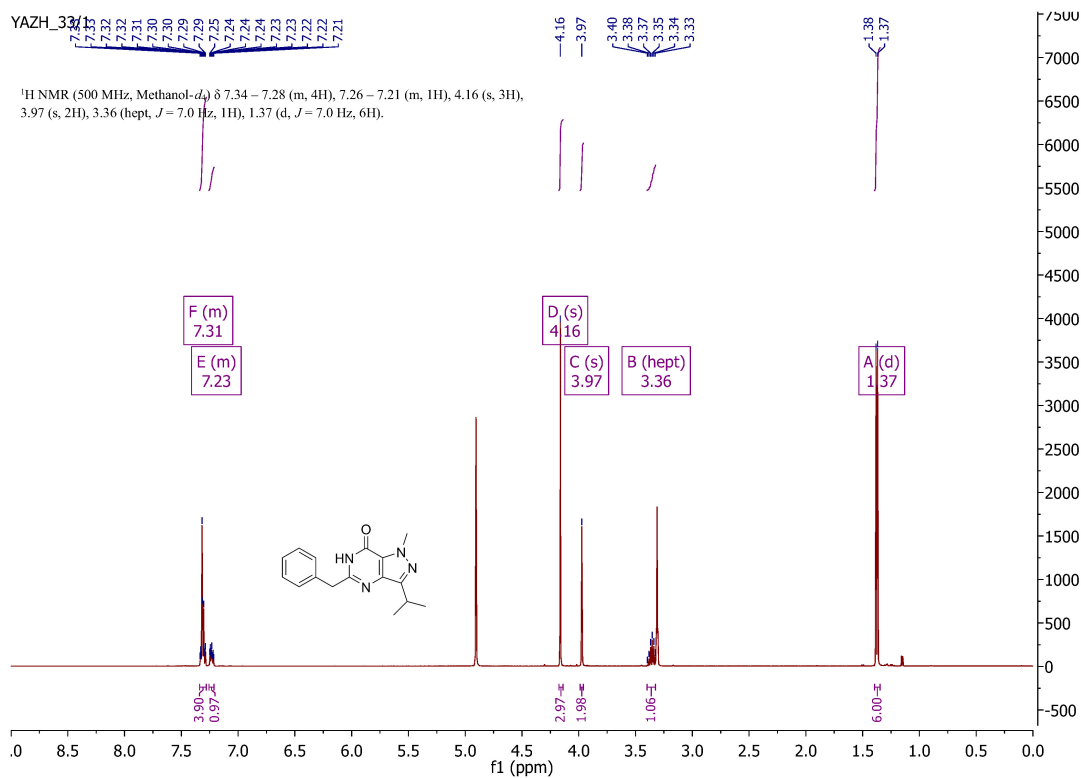

Figure S103. <sup>1</sup>H NMR spectrum of compound **37a**.

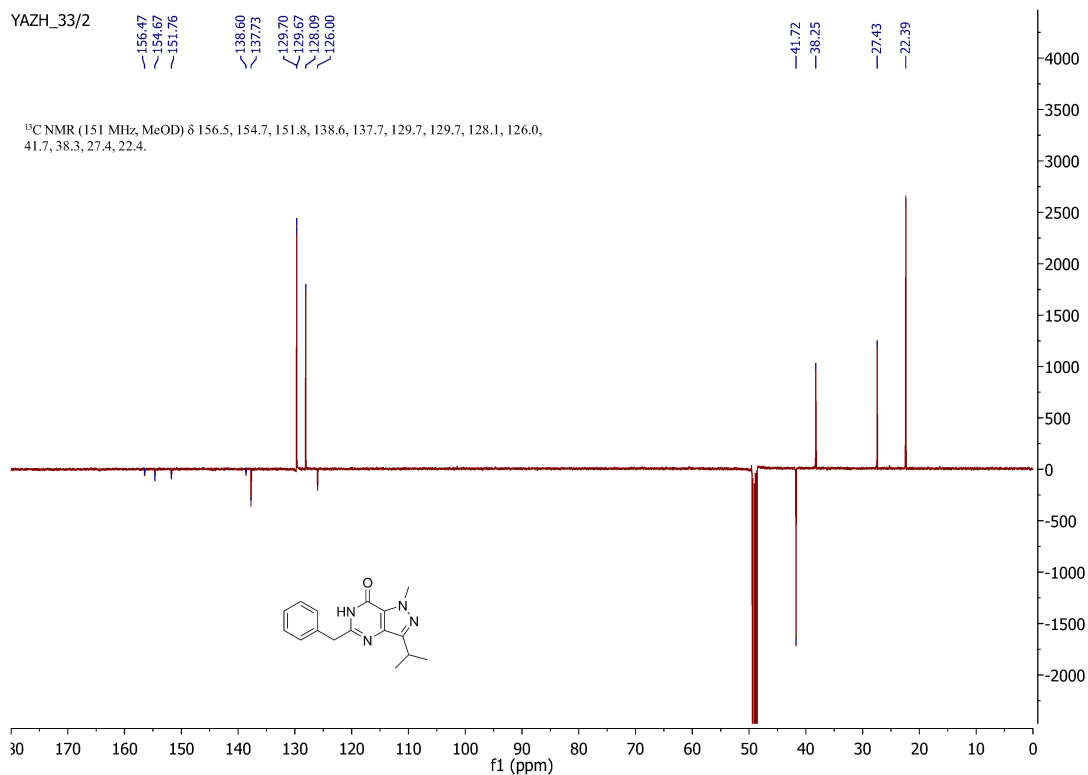

Figure S104. <sup>13</sup>C NMR spectrum of compound **37a**.

Acquired by : Admin  
 Date Acquired : 11/4/2019 12:33:10 PM  
 Sample Name : YAZH\_31  
 Sample ID :  
 Tray# : 1  
 Vial# : 16  
 Injection Volume : 3  
 Data File : C:\LabSolutions\Data\2019\2019-wk15\YAZH\_31.lcd  
 Background File : blanco 11042019.lcd  
 Method File : Method SCAN ACID standard.lcm  
 Report Format : DefaultLCMS.lcr  
 Tuning File : C:\LabSolutions\Tuning\Tuning-ESI-pos-neg01072015a.lct  
 Processed by : Admin  
 Modified Date : 11/4/2019 2:02:29 PM

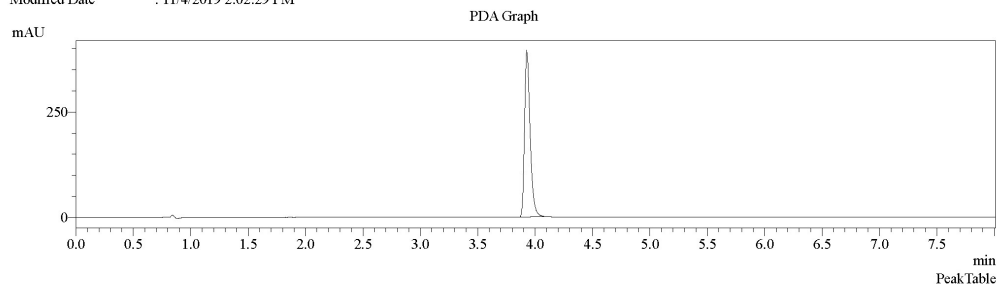

PDA Ch1 254nm 4nm

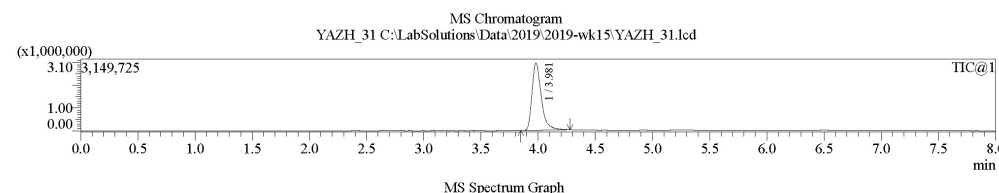

MS Spectrum Graph

#1 Ret.Time:Averaged 3.970-3.990(Scan#:398-400)  
 BG Mode:Calc 3.850<->4.280(386<->429)  
 Mass Peaks:8 Base Peak:283.10(2112647) Polarity:Pos Segment1 - Event1

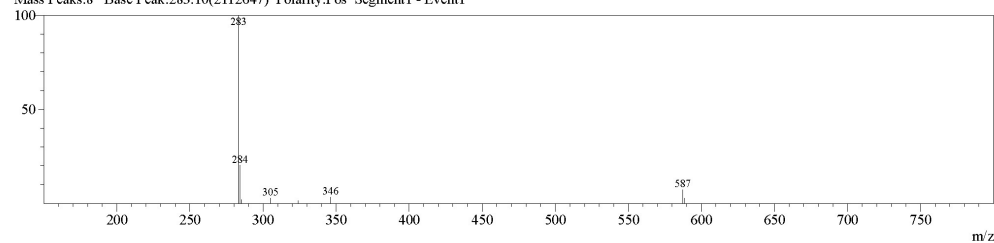

MS Spectrum Table

#1 Ret.Time:  
 BG Mode:Calc 3.850<->4.280(386<->429)  
 Mass Peaks:8 Base Peak:283.10(2112647) Polarity:Pos Segment1 - Event1

| # | m/z    | Abs.Inten. | Rel.Inten. | Charge | Polarity | Monoisotopic | # | m/z    | Abs.Inten. | Rel.Inten. | Charge | Polarity | Monoisotopic |
|---|--------|------------|------------|--------|----------|--------------|---|--------|------------|------------|--------|----------|--------------|
| 1 | 283.10 | 2112647    | 100.00     |        |          |              | 5 | 324.05 | 27628      | 1.31       |        |          |              |
| 2 | 284.15 | 426066     | 20.17      |        |          |              | 6 | 346.15 | 68700      | 3.25       |        |          |              |
| 3 | 285.15 | 40415      | 1.91       |        |          |              | 7 | 587.30 | 154265     | 7.30       |        |          |              |
| 4 | 305.05 | 56694      | 2.68       |        |          |              | 8 | 588.30 | 57906      | 2.74       |        |          |              |

Figure S105. LCMS spectrum of compound **37b**.

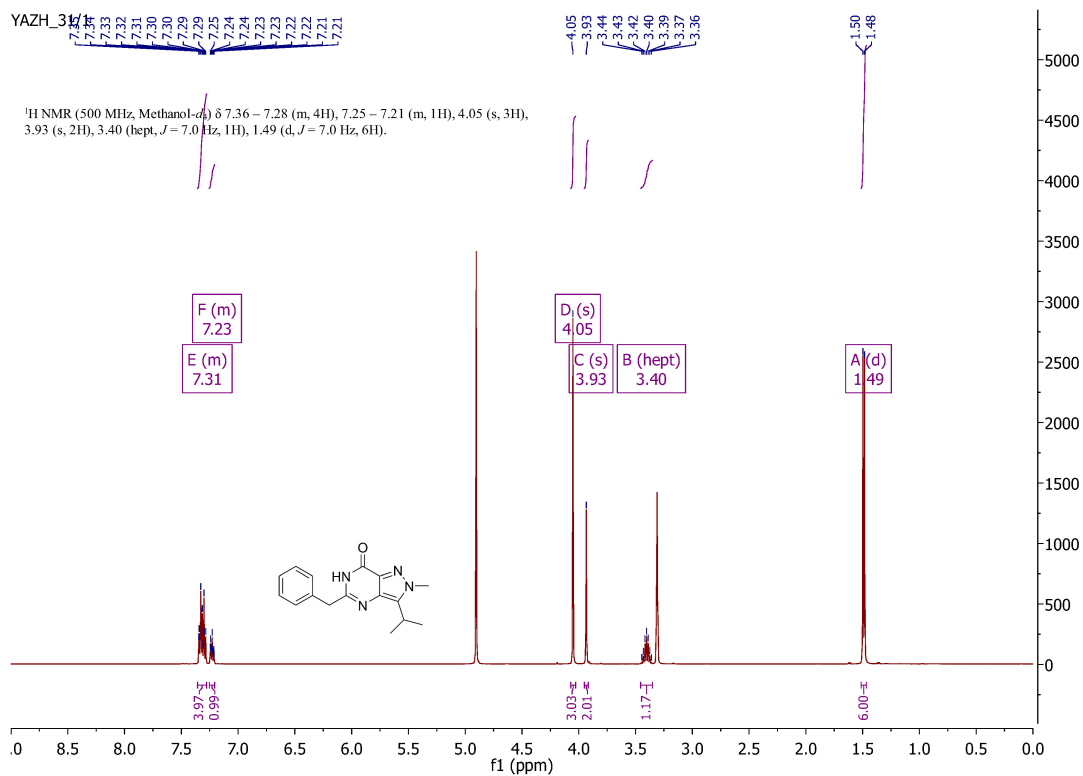

Figure S106. <sup>1</sup>H NMR spectrum of compound **37b**.

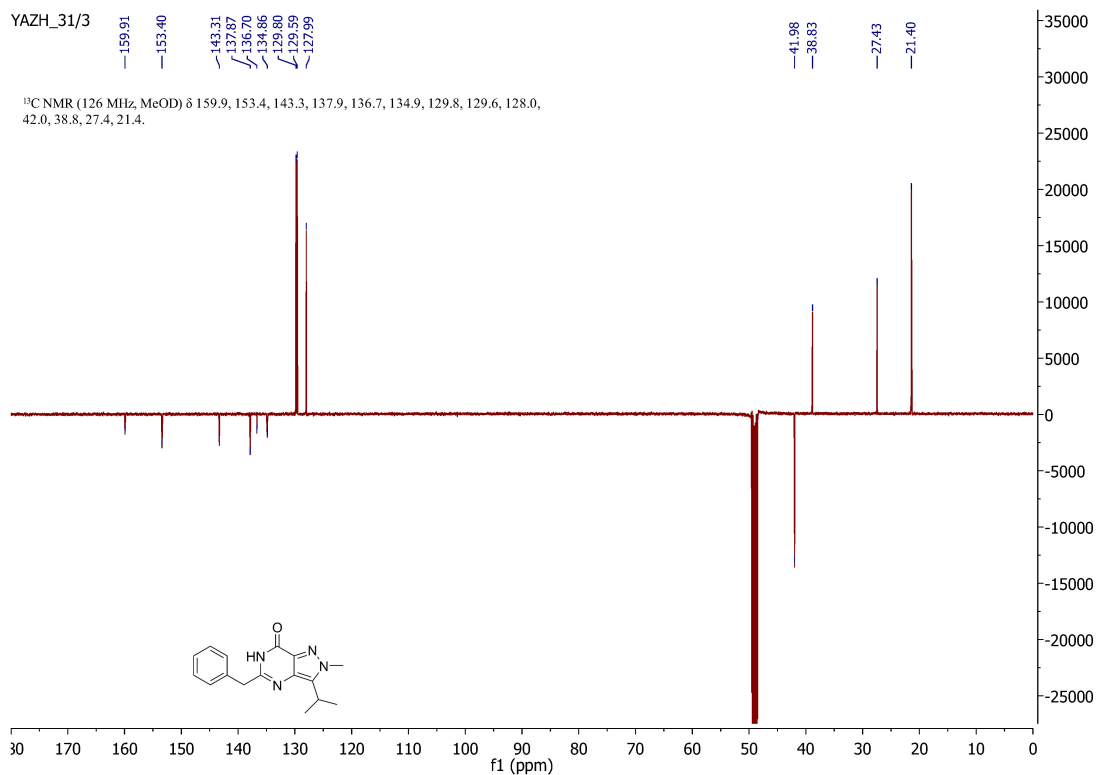

Figure S107. <sup>13</sup>C NMR spectrum of compound **37b**.



Acquired by : Admin  
Date Acquired : 25/3/2019 11:22:17 AM  
Sample Name : YAZH\_34  
Sample ID :  
Tray# : 1  
Vial# : 8  
Injection Volume : 3  
Data File : C:\LabSolutions\Data\2019\2019-wk12\YAZH\_34.lcd  
Background File : blanco\_25032019.lcd  
Method File : Method SCAN ACID standard.lcm  
Report Format : DefaultL.CMS.lcr  
Tuning File : C:\LabSolutions\Tuning\Tuning-ESI-pos-neg01072015a.lct  
Processed by : Admin  
Modified Date : 18/6/2019 10:18:35 AM

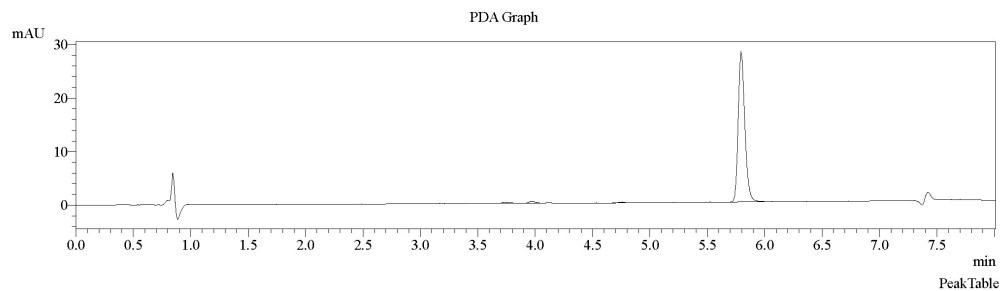

PDA Ch1 254nm 4nm

| Peak# | Name | Ret. Time | Area   | Area % |
|-------|------|-----------|--------|--------|
| 1     |      | 3.729     | 960    | 0.837  |
| 2     |      | 3.965     | 1168   | 1.018  |
| 3     |      | 4.752     | 874    | 0.762  |
| 4     |      | 5.789     | 111803 | 97.384 |

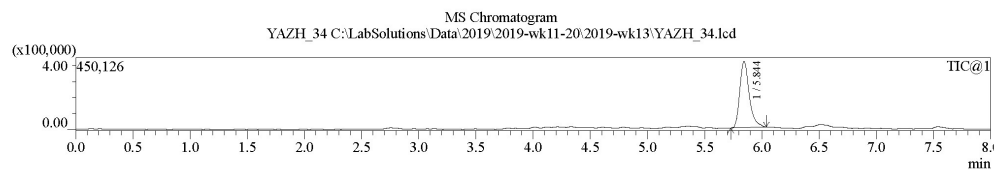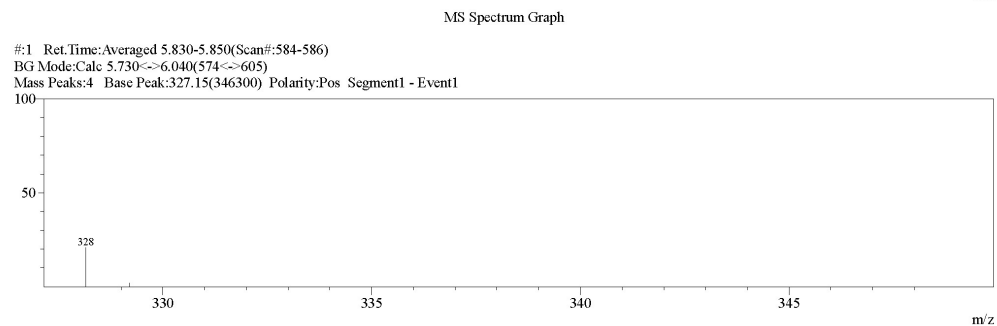

MS Spectrum Table

#1 Ret.Time:  
BG Mode:Calc 5.730<->6.040(574<->605)  
Mass Peaks:4 Base Peak:327.15(346300) Polarity:Pos Segment1 - Event1

| # | m/z    | Abs.Inten. | Rel.Inten. | Charge | Polarity | Monoisotopic | # | m/z    | Abs.Inten. | Rel.Inten. | Charge | Polarity | Monoisotopic |
|---|--------|------------|------------|--------|----------|--------------|---|--------|------------|------------|--------|----------|--------------|
| 1 | 327.15 | 346300     | 100.00     |        |          |              | 3 | 329.20 | 6716       | 1.94       |        |          |              |
| 2 | 328.15 | 71718      | 20.71      |        |          |              | 4 | 349.90 | 3808       | 1.10       |        |          |              |

Figure S108. LCMS spectrum of compound **38a**.

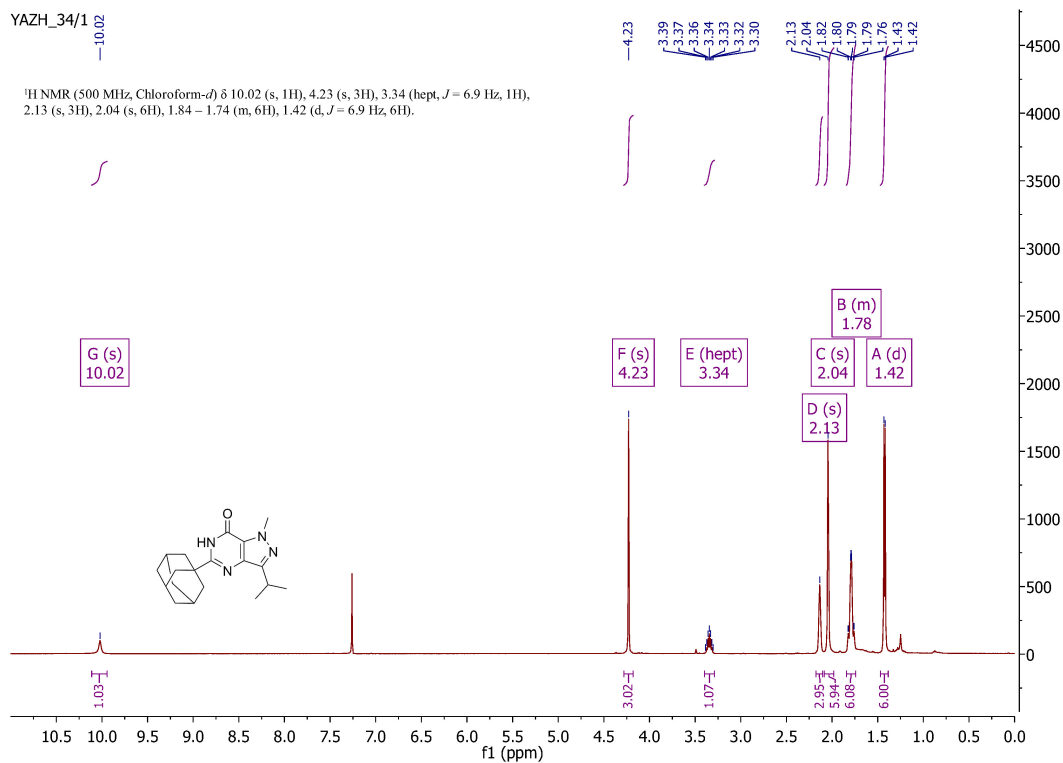

Figure S109. <sup>1</sup>H NMR spectrum of compound **38a**.

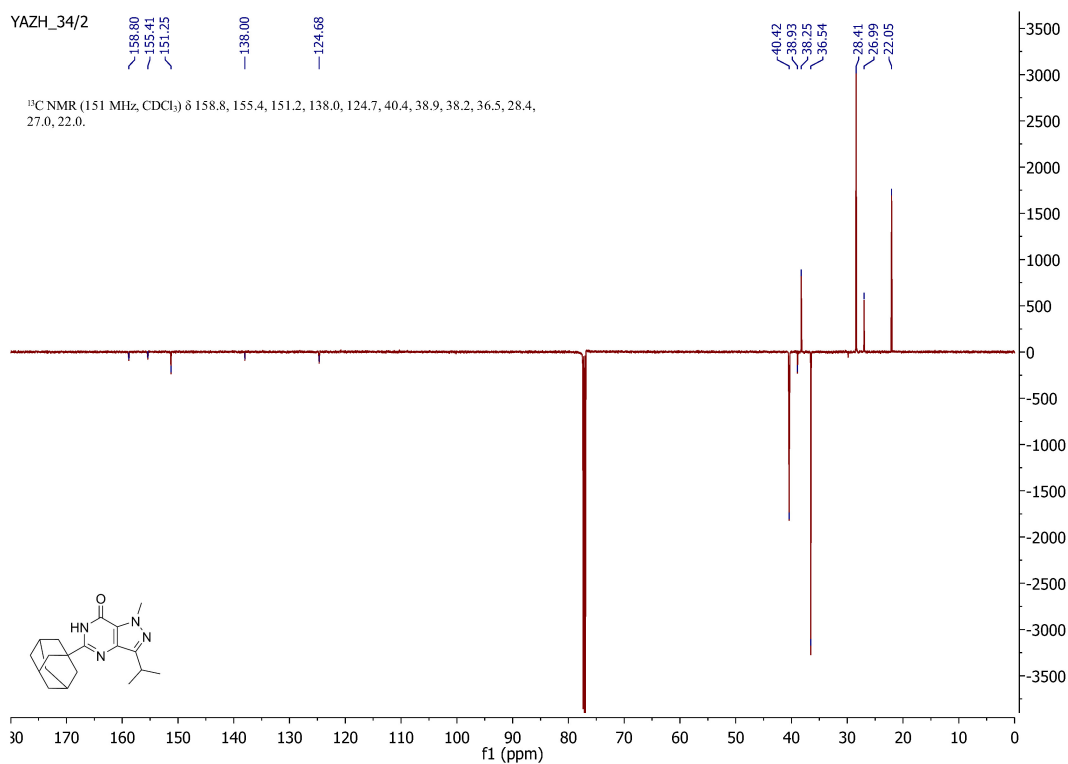

Figure S110. <sup>13</sup>C NMR spectrum of compound **38a**.

Acquired by : Admin  
 Date Acquired : 1/4/2019 10:21:09 AM  
 Sample Name : YAZH\_32  
 Sample ID :  
 Tray# : 1  
 Vial# : 5  
 Injection Volume : 3  
 Data File : C:\LabSolutions\Data\2019\2019-wk14\YAZH\_32.lcd  
 Background File : blanco 01042019.lcd  
 Method File : Method SCAN ACID standard.lcm  
 Report Format : DefaultLCMS.lcr  
 Tuning File : C:\LabSolutions\Tuning\Tuning-ESI-pos-neg01072015a.lct  
 Processed by : Admin  
 Modified Date : 1/4/2019 10:48:49 AM

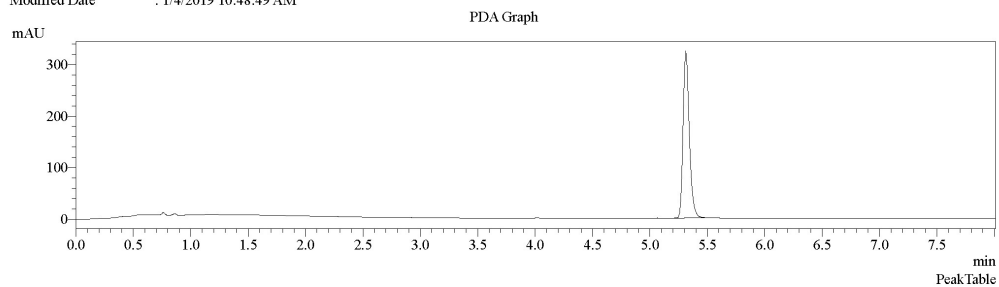

PDA Ch1 254nm 4nm

| Peak# | Name | Ret. Time | Area    | Area %  |
|-------|------|-----------|---------|---------|
| 1     |      | 5.307     | 1228769 | 100.000 |

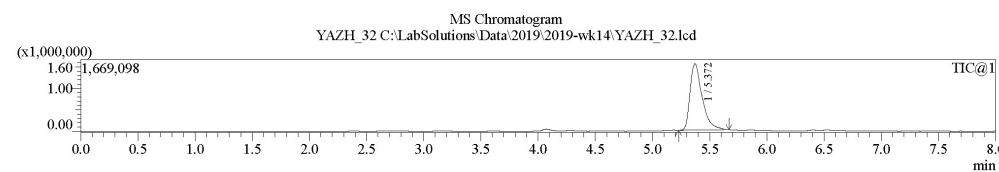

MS Spectrum Graph

#1 Ret.Time:Averaged 5.360-5.380(Scan#:537-539)  
 BG Mode:Calc 5.230<->5.670(524<->568)  
 Mass Peaks:9 Base Peak:327.20(1028791) Polarity:Pos Segment1 - Event1

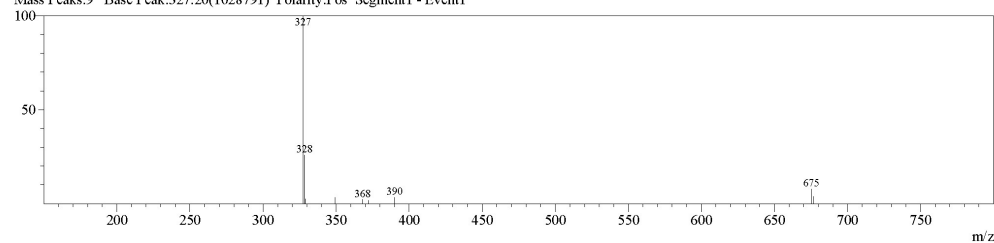

MS Spectrum Table

#1 Ret.Time:

BG Mode:Calc 5.230<->5.670(524<->568)

Mass Peaks:9 Base Peak:327.20(1028791) Polarity:Pos Segment1 - Event1

| # | m/z    | Abs.Inten. | Rel.Inten. | Charge | Polarity | Monoisotopic | # | m/z    | Abs.Inten. | Rel.Inten. | Charge | Polarity | Monoisotopic |
|---|--------|------------|------------|--------|----------|--------------|---|--------|------------|------------|--------|----------|--------------|
| 1 | 327.20 | 1028791    | 100.00     |        |          |              | 6 | 372.30 | 16481      | 1.60       |        |          |              |
| 2 | 328.20 | 265664     | 25.82      |        |          |              | 7 | 390.15 | 34662      | 3.37       |        |          |              |
| 3 | 329.15 | 26096      | 2.54       |        |          |              | 8 | 675.40 | 80149      | 7.79       |        |          |              |
| 4 | 349.10 | 32693      | 3.18       |        |          |              | 9 | 676.45 | 37982      | 3.69       |        |          |              |
| 5 | 368.15 | 21306      | 2.07       |        |          |              |   |        |            |            |        |          |              |

Figure S111. LCMS spectrum of compound **38b**.

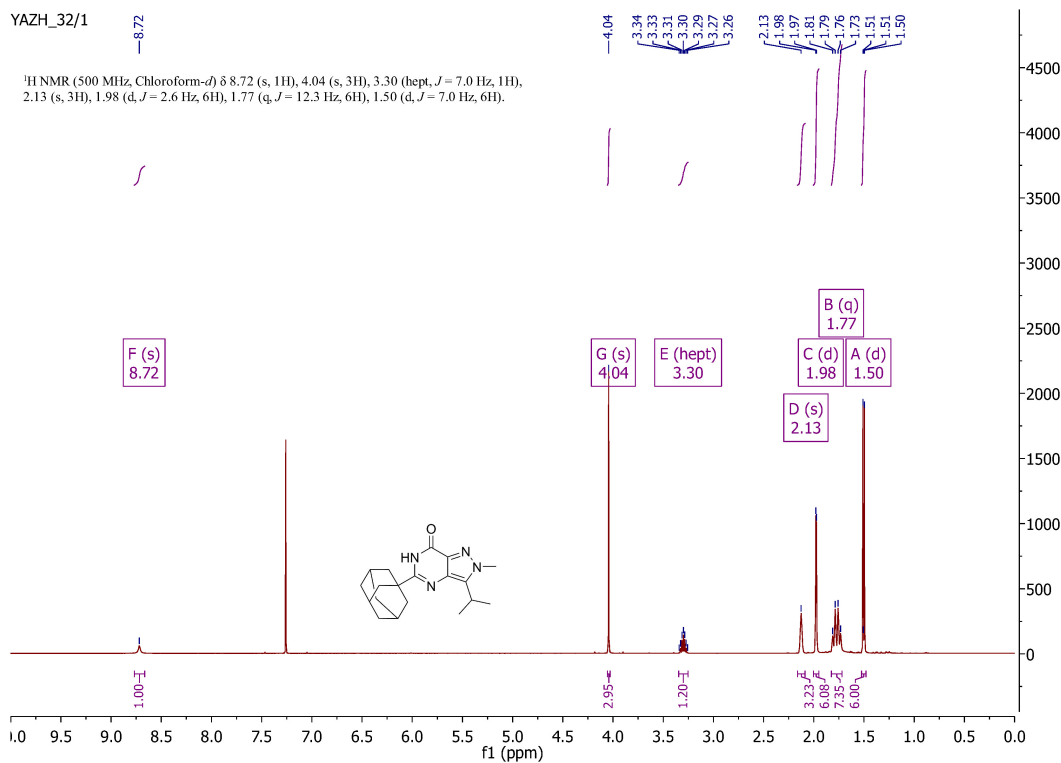

Figure S112. <sup>1</sup>H NMR spectrum of compound **38b**.

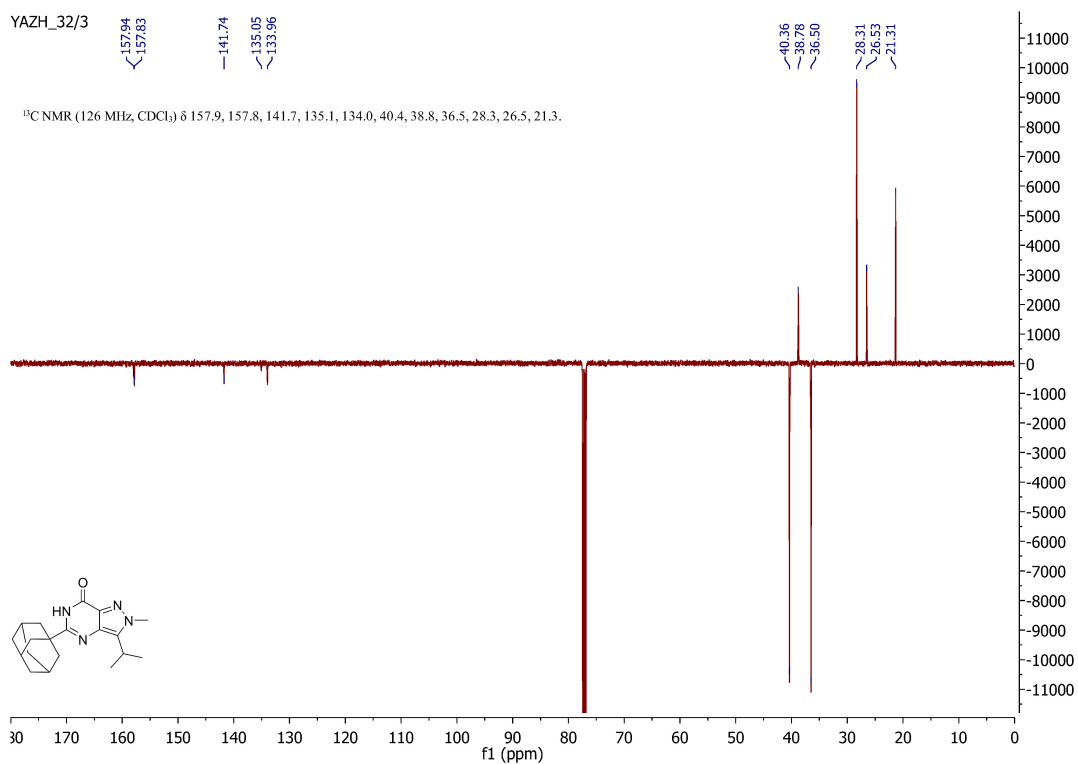

Figure S113. <sup>13</sup>C NMR spectrum of compound **38b**.

Acquired by : Admin  
Date Acquired : 16/7/2018 10:51:14 AM  
Sample Name : LABA-022  
Sample ID :  
Tray# : 1  
Vial# : 9  
Injection Volume : 1  
Data File : C:\LabSolutions\Data\2018\2018-wk29\LABA-022.lcd  
Background File : Blanco 16072018.lcd  
Method File : Method SCAN ACID standard neg.lcm  
Report Format : DefaultLCMS.lcr  
Tuning File : C:\LabSolutions\Tuning\Tuning-ESI-pos-neg01072015a.lct  
Processed by : Admin  
Modified Date : 16/7/2018 11:08:48 AM

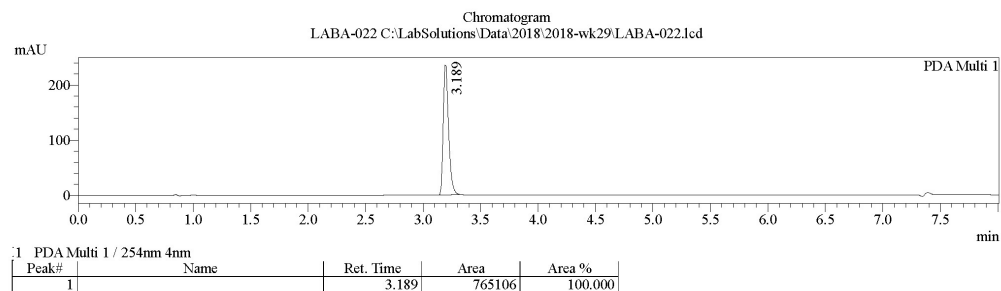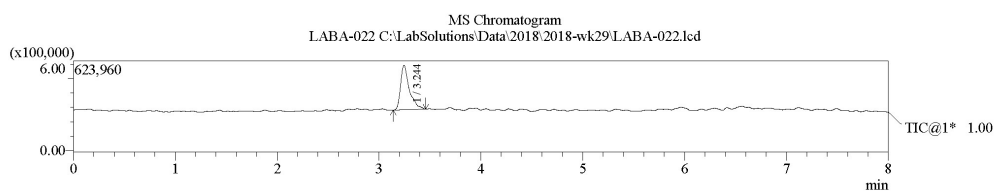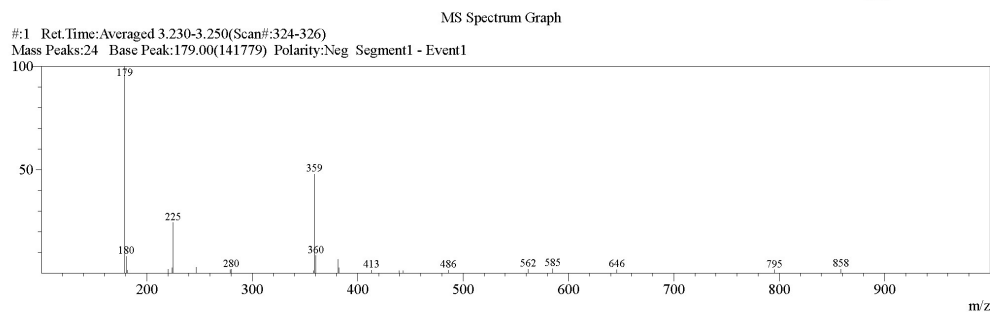

MS Spectrum Table  
#1 Ret.Time:  
BG Mode:Calc 3.140<=>3.460(315<=>347)  
Mass Peaks:24 Base Peak:179.00(141779) Polarity:Neg Segment1 - Event1

| #  | m/z    | Abs.Inten. | Rel.Inten. | Charge | Polarity | Monoisotopic | #  | m/z     | Abs.Inten. | Rel.Inten. | Charge | Polarity | Monoisotopic |
|----|--------|------------|------------|--------|----------|--------------|----|---------|------------|------------|--------|----------|--------------|
| 1  | 179.00 | 141779     | 100.00     |        |          |              | 13 | 381.25  | 9413       | 6.64       |        |          |              |
| 2  | 180.25 | 11417      | 8.05       |        |          |              | 14 | 382.20  | 3611       | 2.55       |        |          |              |
| 3  | 181.20 | 1755       | 1.24       |        |          |              | 15 | 413.10  | 2066       | 1.46       |        |          |              |
| 4  | 220.15 | 2520       | 1.78       |        |          |              | 16 | 439.15  | 1523       | 1.07       |        |          |              |
| 5  | 224.15 | 3579       | 2.52       |        |          |              | 17 | 443.25  | 1420       | 1.00       |        |          |              |
| 6  | 225.05 | 34564      | 24.38      |        |          |              | 18 | 486.00  | 1824       | 1.29       |        |          |              |
| 7  | 247.05 | 4057       | 2.86       |        |          |              | 19 | 561.95  | 2607       | 1.84       |        |          |              |
| 8  | 279.10 | 2230       | 1.57       |        |          |              | 20 | 585.05  | 2845       | 2.01       |        |          |              |
| 9  | 280.00 | 2476       | 1.75       |        |          |              | 21 | 645.70  | 2233       | 1.57       |        |          |              |
| 10 | 358.10 | 1454       | 1.03       |        |          |              | 22 | 795.40  | 2152       | 1.52       |        |          |              |
| 11 | 359.15 | 67854      | 47.86      |        |          |              | 23 | 858.30  | 2564       | 1.81       |        |          |              |
| 12 | 360.15 | 11941      | 8.42       |        |          |              | 24 | 1051.00 | 2181       | 1.54       |        |          |              |

Figure S114. LCMS spectrum of compound **42b**.

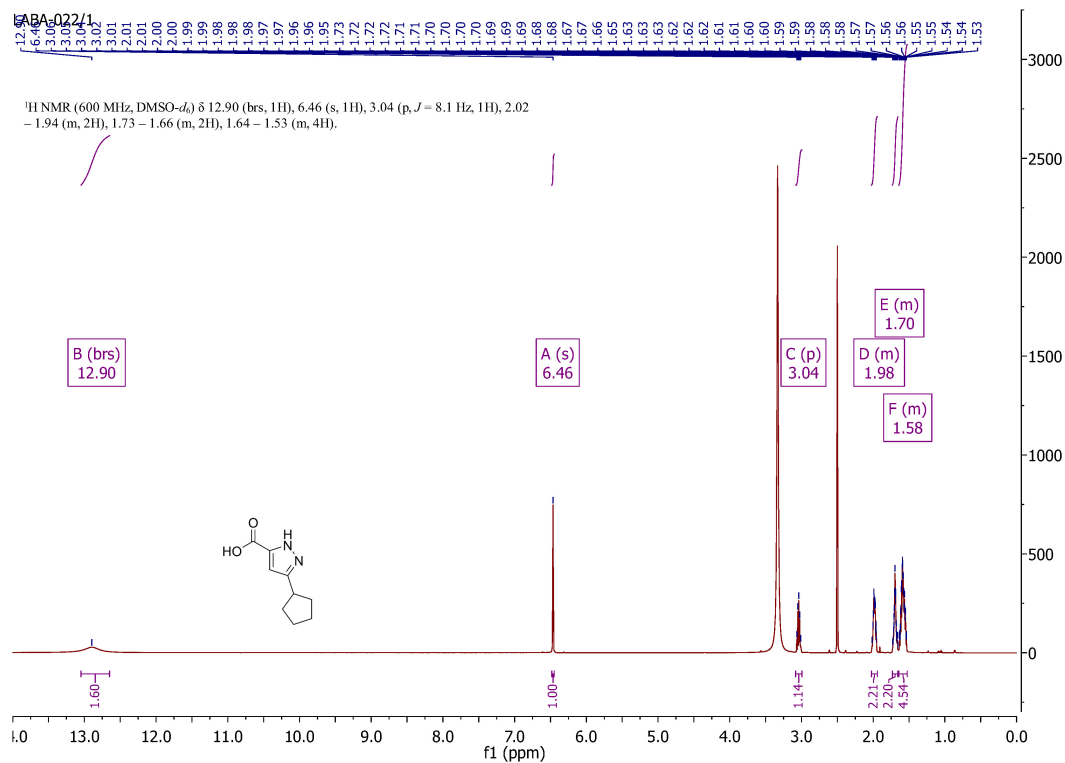

Figure S115. <sup>1</sup>H NMR spectrum of compound **42b**.

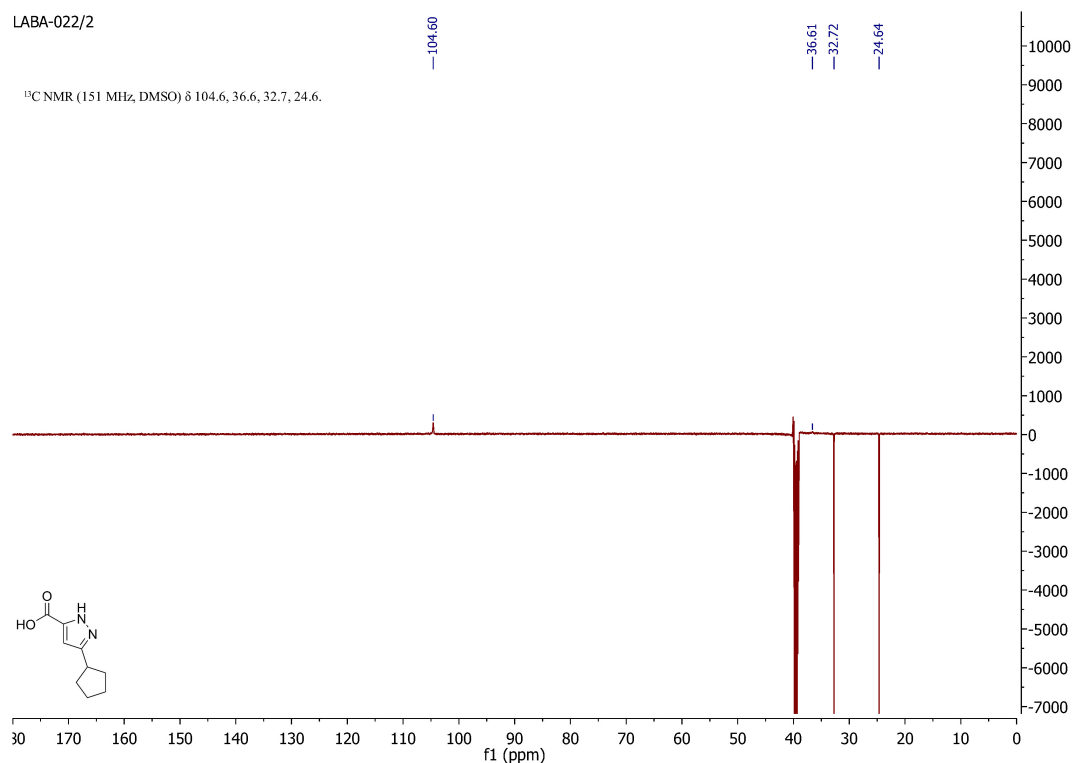

Figure S116. <sup>13</sup>C NMR spectrum of compound **42b**.

Acquired by : Admin  
 Date Acquired : 8/8/2017 12:43:48 PM  
 Sample Name : YAZH01-126-1  
 Sample ID :  
 Tray# : 1  
 Vial# : 2  
 Injection Volume : 10  
 Data File : C:\LabSolutions\Data\2017\2017-wk32\YAZH01-126-1.lcd  
 Background File : blanco08082017.lcd  
 Method File : Method SCAN ACID standard neg.lcm  
 Report Format : DefaultLCMS.lcr  
 Tuning File : C:\LabSolutions\Tuning\Tuning-ESI-pos-neg01072015a.lct  
 Processed by : Admin  
 Modified Date : 8/9/2017 3:58:23 PM

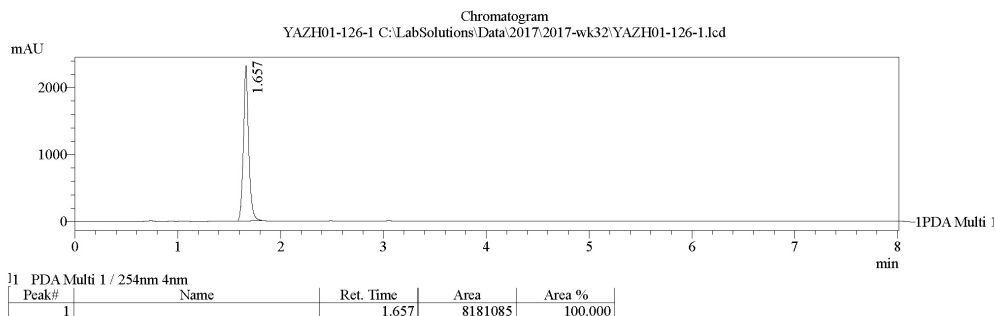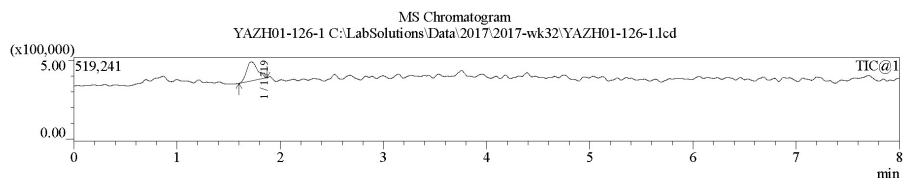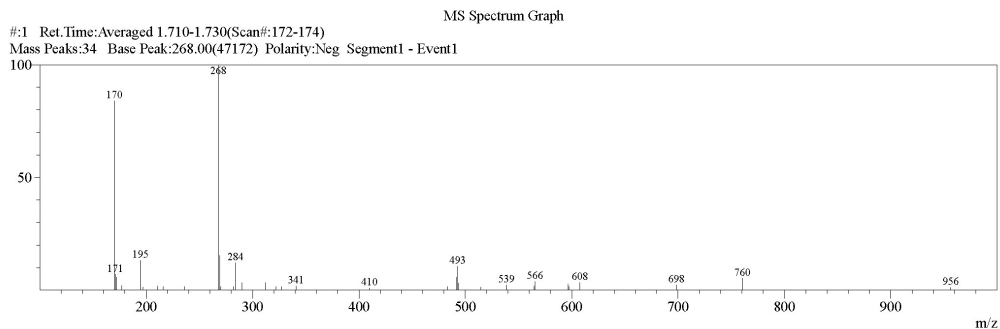

| #1 Ret.Time:                                                         |        |            |            |        |          |              |    |        |            |            |        |          |              |
|----------------------------------------------------------------------|--------|------------|------------|--------|----------|--------------|----|--------|------------|------------|--------|----------|--------------|
| BG Mode:Calc 1.600<=>1.870(161<=>188)                                |        |            |            |        |          |              |    |        |            |            |        |          |              |
| Mass Peaks:34 Base Peak:268.00(47172) Polarity:Neg Segment1 - Event1 |        |            |            |        |          |              |    |        |            |            |        |          |              |
| #                                                                    | m/z    | Abs.Inten. | Rel.Inten. | Charge | Polarity | Monoisotopic | #  | m/z    | Abs.Inten. | Rel.Inten. | Charge | Polarity | Monoisotopic |
| 1                                                                    | 169.95 | 39630      | 84.01      |        |          |              | 9  | 235.80 | 770        | 1.63       |        |          |              |
| 2                                                                    | 171.00 | 3308       | 7.01       |        |          |              | 10 | 268.00 | 47172      | 100.00     |        |          |              |
| 3                                                                    | 172.00 | 2757       | 5.84       |        |          |              | 11 | 269.05 | 7198       | 15.26      |        |          |              |
| 4                                                                    | 177.00 | 942        | 2.00       |        |          |              | 12 | 270.05 | 811        | 1.72       |        |          |              |
| 5                                                                    | 194.85 | 6203       | 13.15      |        |          |              | 13 | 282.10 | 728        | 1.54       |        |          |              |
| 6                                                                    | 196.85 | 633        | 1.34       |        |          |              | 14 | 284.00 | 5680       | 12.04      |        |          |              |
| 7                                                                    | 210.95 | 915        | 1.94       |        |          |              | 15 | 290.20 | 1608       | 3.41       |        |          |              |
| 8                                                                    | 215.95 | 793        | 1.68       |        |          |              | 16 | 312.05 | 1592       | 3.37       |        |          |              |

Figure S117. LCMS spectrum of compound **43a**.

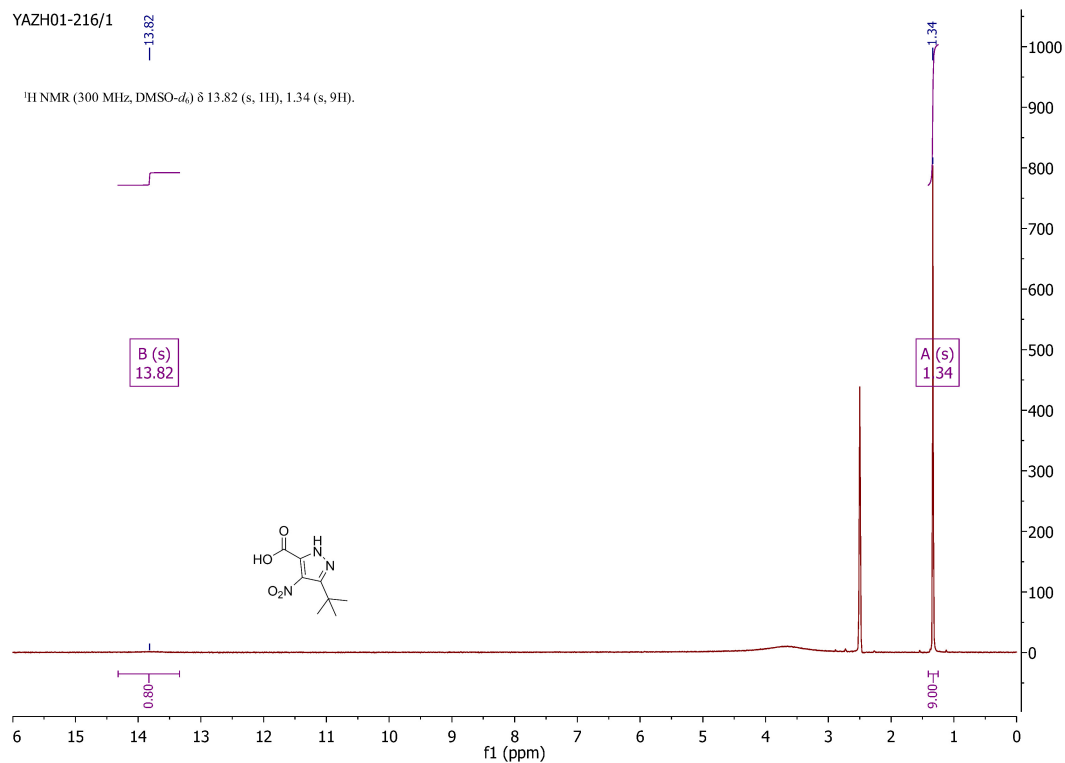

Figure S118.  $^1\text{H}$  NMR spectrum of compound **43a**.

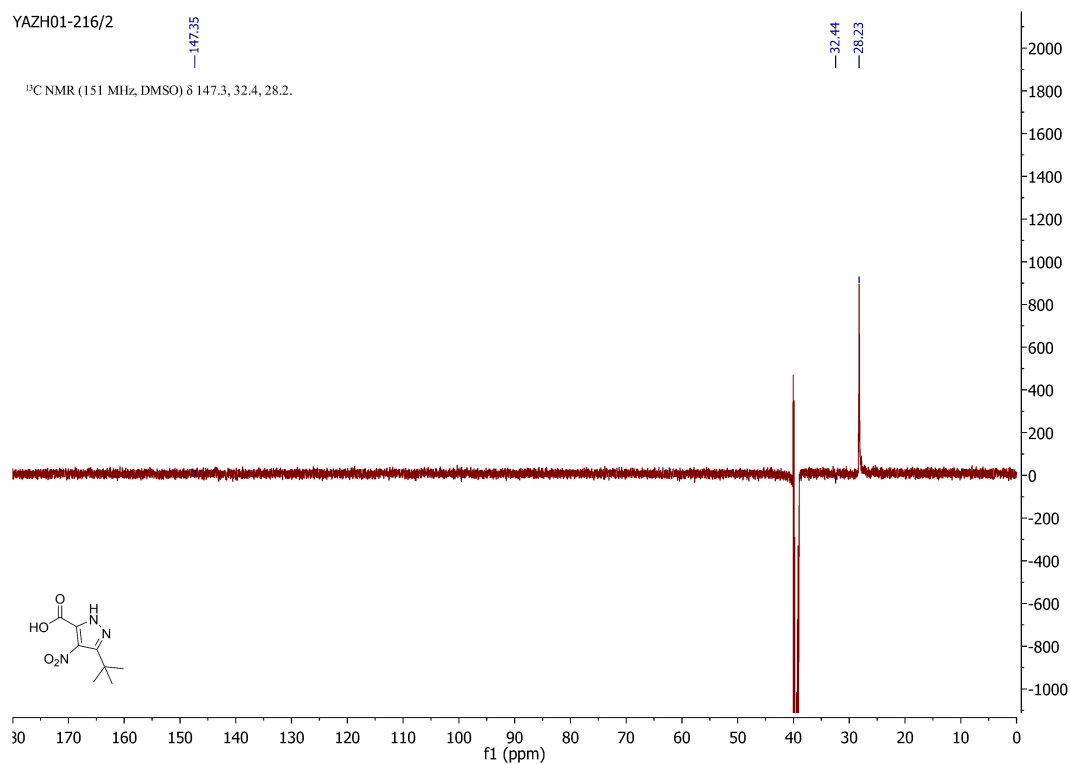

Figure S119.  $^{13}\text{C}$  NMR spectrum of compound **43a**.



Acquired by : Admin  
 Date Acquired : 17/7/2018 3:35:18 PM  
 Sample Name : LABA-024-AFTERFILT  
 Sample ID :  
 Tray# : 1  
 Vial# : 31  
 Injection Volume : 1  
 Data File : C:\LabSolutions\Data\2018\2018-wk29\LABA-024-AFTERFILT.lcd  
 Background File : blanco 17072018.lcd  
 Method File : Method SCAN ACID standard neg.lcm  
 Report Format : Default.LCMS.rpt  
 Tuning File : C:\LabSolutions\Tuning\Tuning-ESI-pos-neg01072015a.lct  
 Processed by : Admin  
 Modified Date : 17/11/2020 11:01:33 AM

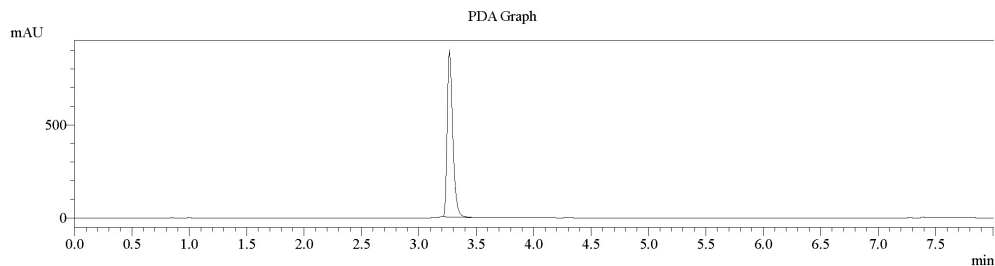

PDA Ch1 254nm 4nm

| Peak# | Name | Ret. Time | Area    | Area %  |
|-------|------|-----------|---------|---------|
| 1     |      | 3.261     | 2956934 | 100.000 |

Peak Table

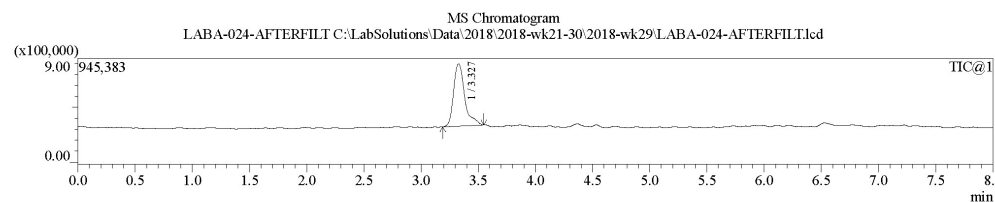

MS Spectrum Graph

#1 Ret.Time:Averaged 3.320-3.340(Scan#:333-335)  
 BG Mode:Calc 3.190<>3.550(320<>356)  
 Mass Peaks:11 Base Peak:224.00(265539) Polarity:Neg Segment1 - Event1

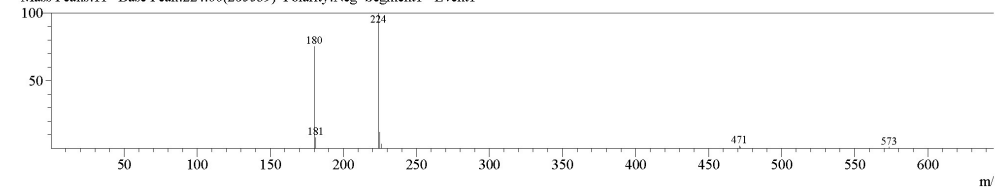

MS Spectrum Table

| #1 Ret.Time:                                                          |        |            |            |        |          |              |    |        |            |            |
|-----------------------------------------------------------------------|--------|------------|------------|--------|----------|--------------|----|--------|------------|------------|
| BG Mode:Calc 3.190<>3.550(320<>356)                                   |        |            |            |        |          |              |    |        |            |            |
| Mass Peaks:11 Base Peak:224.00(265539) Polarity:Neg Segment1 - Event1 |        |            |            |        |          |              |    |        |            |            |
| #                                                                     | m/z    | Abs.Inten. | Rel.Inten. | Charge | Polarity | Monoisotopic | #  | m/z    | Abs.Inten. | Rel.Inten. |
| 1                                                                     | 180.05 | 199863     | 75.27      |        |          |              | 7  | 471.70 | 3493       | 1.32       |
| 2                                                                     | 181.00 | 20977      | 7.90       |        |          |              | 8  | 573.50 | 2672       | 1.01       |
| 3                                                                     | 224.00 | 265539     | 100.00     |        |          |              | 9  | 712.20 | 6994       | 2.63       |
| 4                                                                     | 225.05 | 31685      | 11.93      |        |          |              | 10 | 718.20 | 4035       | 1.52       |
| 5                                                                     | 225.95 | 8659       | 3.26       |        |          |              | 11 | 728.20 | 3693       | 1.39       |
| 6                                                                     | 471.20 | 4857       | 1.83       |        |          |              |    |        |            |            |

Figure S120. LCMS spectrum of compound **43b**.

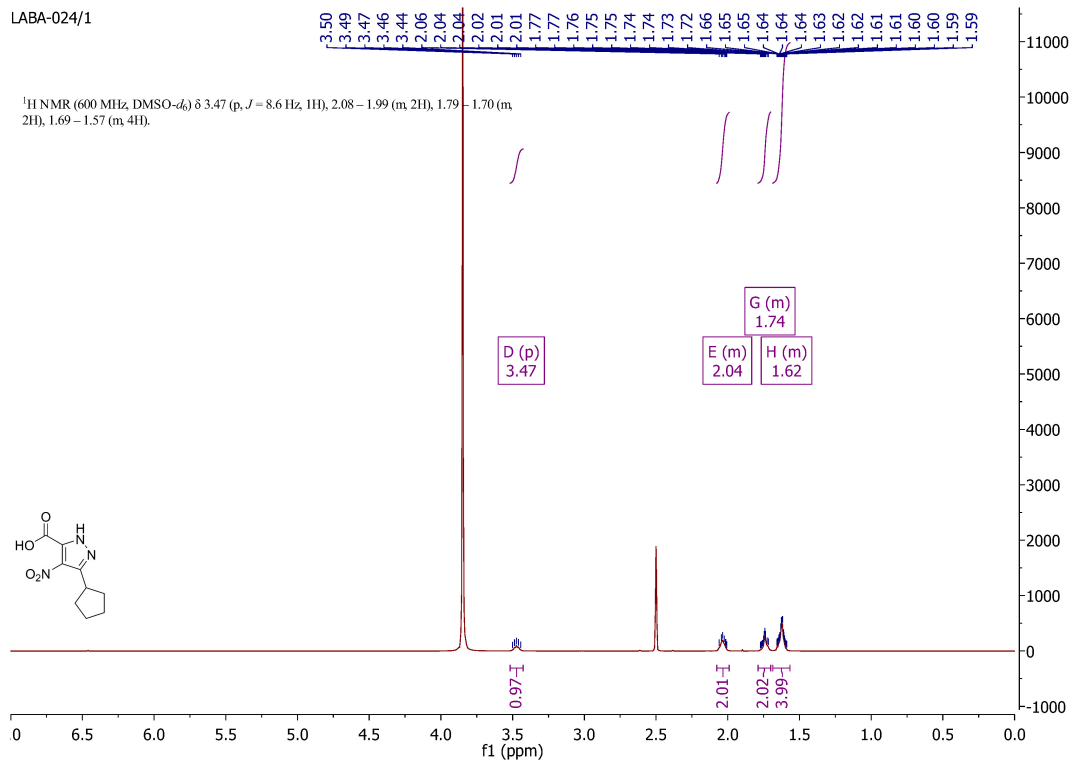

Figure S121.  $^1\text{H}$  NMR spectrum of compound **43b**.

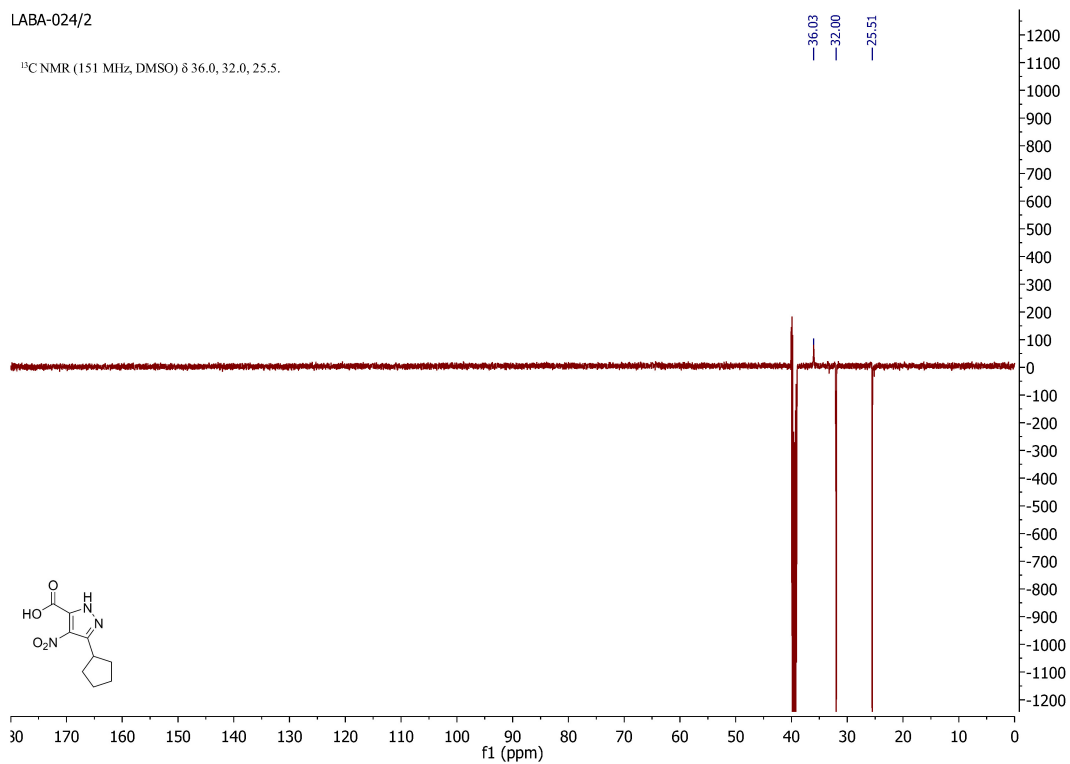

Figure S122.  $^{13}\text{C}$  NMR spectrum of compound **43b**.

Acquired by : Admin  
 Date Acquired : 10/4/2019 12:04:54 PM  
 Sample Name : YAZH\_35  
 Sample ID :  
 Tray# : 1  
 Vial# : 49  
 Injection Volume : 3  
 Data File : C:\LabSolutions\Data\2019\2019-wk15\YAZH\_35.lcd  
 Background File : blanco 10042019.lcd  
 Method File : Method SCAN ACID standard.lcm  
 Report Format : DefaultLCMS.lcr  
 Tuning File : C:\LabSolutions\Tuning\Tuning-ESI-pos-neg01072015a.lct  
 Processed by : Admin  
 Modified Date : 10/4/2019 12:38:19 PM

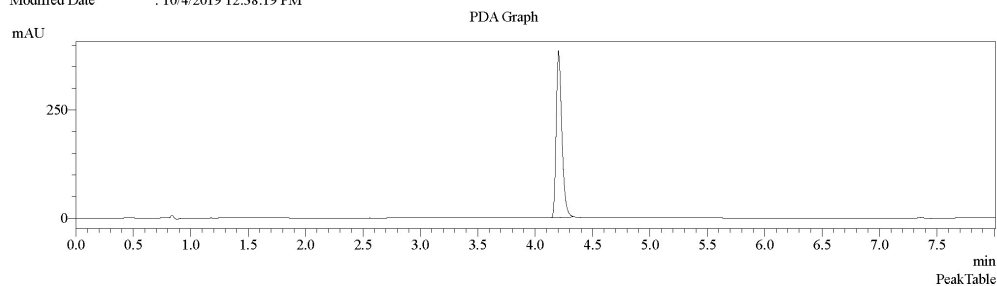

PDA Ch1 254nm 4nm

| Peak# | Name | Ret. Time | Area    | Area %  |
|-------|------|-----------|---------|---------|
| 1     |      | 4.199     | 1311255 | 100.000 |

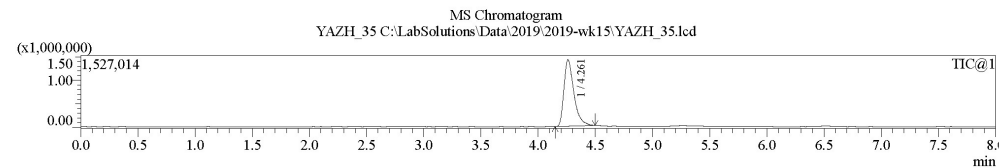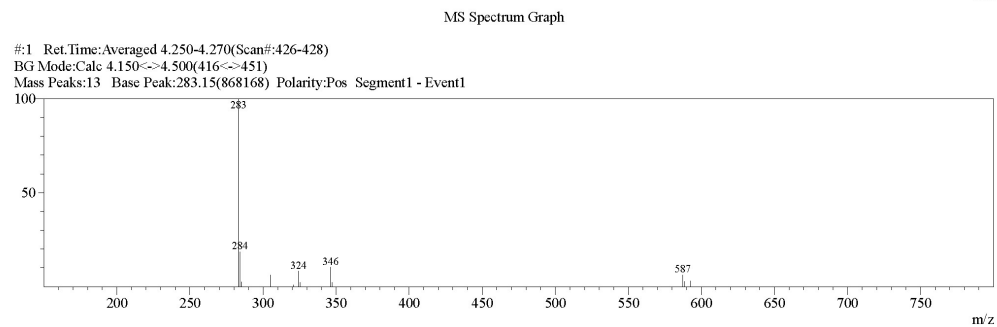

MS Spectrum Table

#1 Ret.Time:  
BG Mode:Calc 4.150<->4.500(416<->451)  
Mass Peaks:13 Base Peak:283.15(868168) Polarity:Pos Segment1 - Event1

| # | m/z    | Abs.Inten. | Rel.Inten. | Charge | Polarity | Monoisotopic | #  | m/z    | Abs.Inten. | Rel.Inten. | Charge | Polarity | Monoisotopic |
|---|--------|------------|------------|--------|----------|--------------|----|--------|------------|------------|--------|----------|--------------|
| 1 | 283.15 | 868168     | 100.00     |        |          |              | 8  | 346.15 | 88549      | 10.20      |        |          |              |
| 2 | 284.10 | 160539     | 18.49      |        |          |              | 9  | 347.15 | 18860      | 2.17       |        |          |              |
| 3 | 285.10 | 21276      | 2.45       |        |          |              | 10 | 587.30 | 54193      | 6.24       |        |          |              |
| 4 | 305.05 | 52972      | 6.10       |        |          |              | 11 | 588.30 | 23663      | 2.73       |        |          |              |
| 5 | 321.05 | 8756       | 1.01       |        |          |              | 12 | 592.50 | 26807      | 3.09       |        |          |              |
| 6 | 324.15 | 70833      | 8.16       |        |          |              | 13 | 592.80 | 14499      | 1.67       |        |          |              |
| 7 | 325.20 | 18297      | 2.11       |        |          |              |    |        |            |            |        |          |              |

Figure S123. LCMS spectrum of compound **46a**.

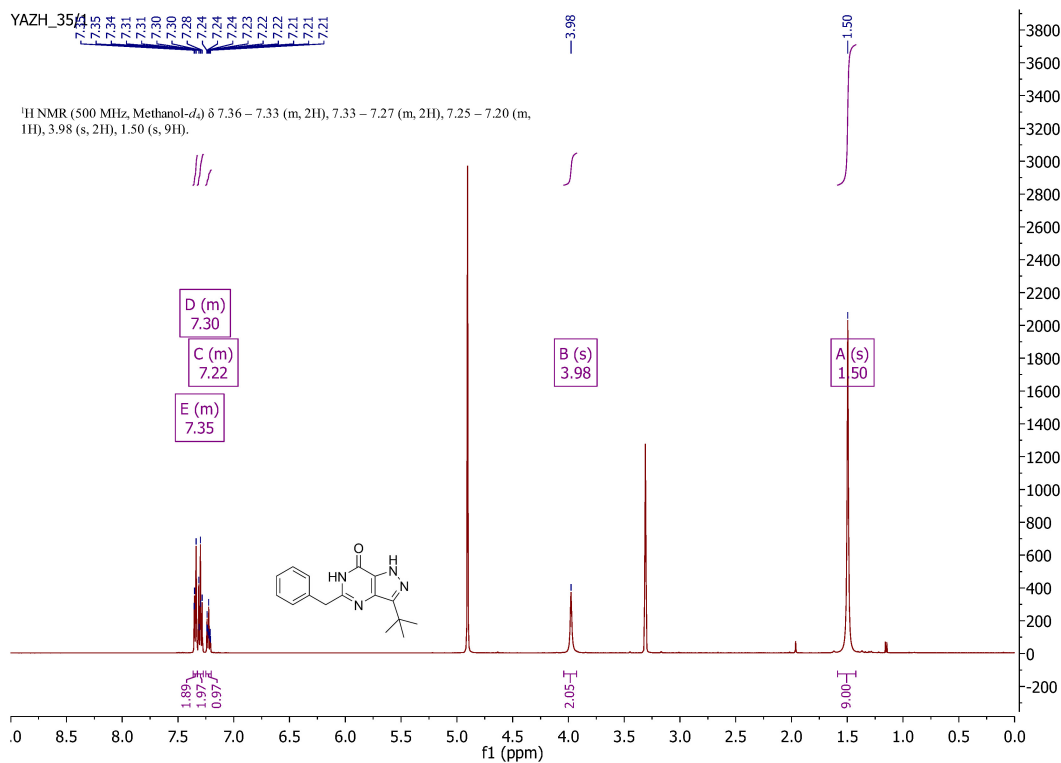

Figure S124.  $^1\text{H}$  NMR spectrum of compound **46a**.

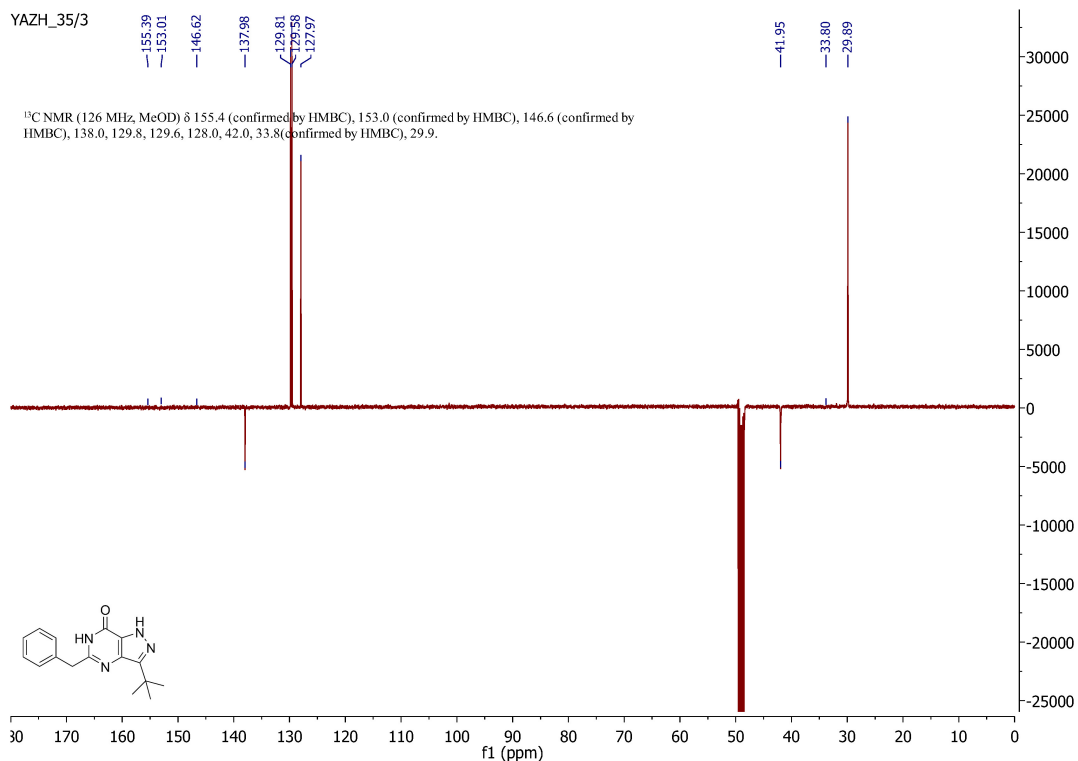

Figure S125.  $^{13}\text{C}$  NMR spectrum of compound **46a**.

Acquired by : Admin  
 Date Acquired : 30/1/2019 10:08:35 AM  
 Sample Name : YAZH01-294-1  
 Sample ID :  
 Tray# : 1  
 Vial# : 2  
 Injection Volume : 1  
 Data File : C:\LabSolutions\Data\2019\2019-wk04\YAZH01-294-1.lcd  
 Background File : blanco30012019.lcd  
 Method File : Method SCAN ACID standard.lcm  
 Report Format : DefaultL.CMS.lcr  
 Tuning File : C:\LabSolutions\Tuning\Tuning-ESI-pos-neg01072015a.lct  
 Processed by : Admin  
 Modified Date : 30/1/2019 10:41:09 AM

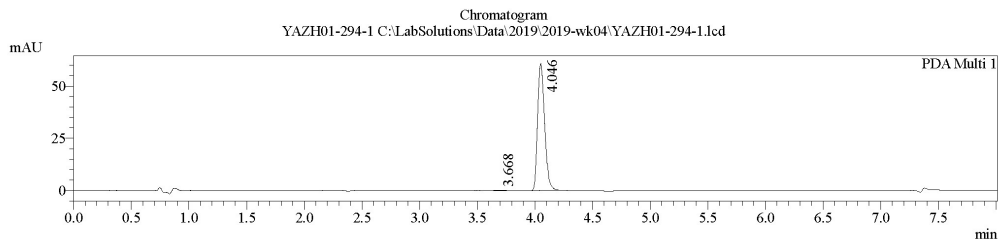

PeakTab1

| Peak# | Name | Ret. Time | Area   | Area % |
|-------|------|-----------|--------|--------|
| 1     |      | 3.668     | 794    | 0.310  |
| 2     |      | 4.046     | 255743 | 99.690 |

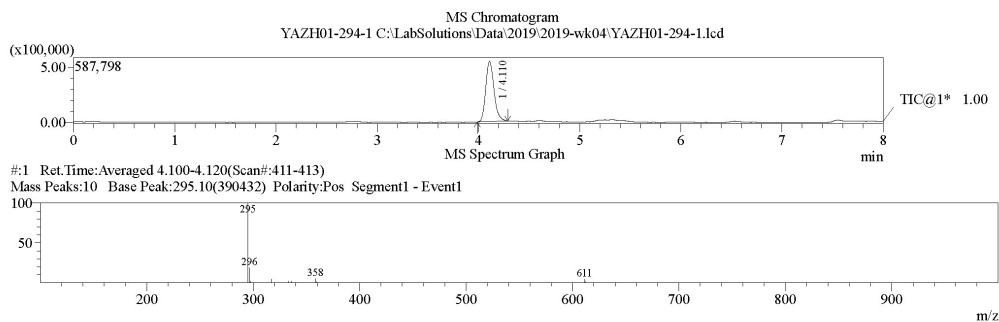

MS Spectrum Table

| #1 Ret.Time:                                                          |        |            |            |        |          |              |    |        |            |            |        |          |              |
|-----------------------------------------------------------------------|--------|------------|------------|--------|----------|--------------|----|--------|------------|------------|--------|----------|--------------|
| BG Mode:Calc 3.990<->4.290(400<->430)                                 |        |            |            |        |          |              |    |        |            |            |        |          |              |
| Mass Peaks:10 Base Peak:295.10(390432) Polarity:Pos Segment1 - Event1 |        |            |            |        |          |              |    |        |            |            |        |          |              |
| #                                                                     | m/z    | Abs.Inten. | Rel.Inten. | Charge | Polarity | Monoisotopic | #  | m/z    | Abs.Inten. | Rel.Inten. | Charge | Polarity | Monoisotopic |
| 1                                                                     | 295.10 | 390432     | 100.00     |        |          |              | 6  | 336.10 | 9158       | 2.35       |        |          |              |
| 2                                                                     | 296.15 | 73812      | 18.91      |        |          |              | 7  | 358.15 | 20482      | 5.25       |        |          |              |
| 3                                                                     | 297.10 | 7165       | 1.84       |        |          |              | 8  | 359.15 | 4901       | 1.26       |        |          |              |
| 4                                                                     | 317.10 | 17514      | 4.49       |        |          |              | 9  | 611.25 | 17194      | 4.40       |        |          |              |
| 5                                                                     | 333.00 | 7485       | 1.92       |        |          |              | 10 | 612.25 | 5322       | 1.36       |        |          |              |

Figure S126. LCMS spectrum of compound **46b**.

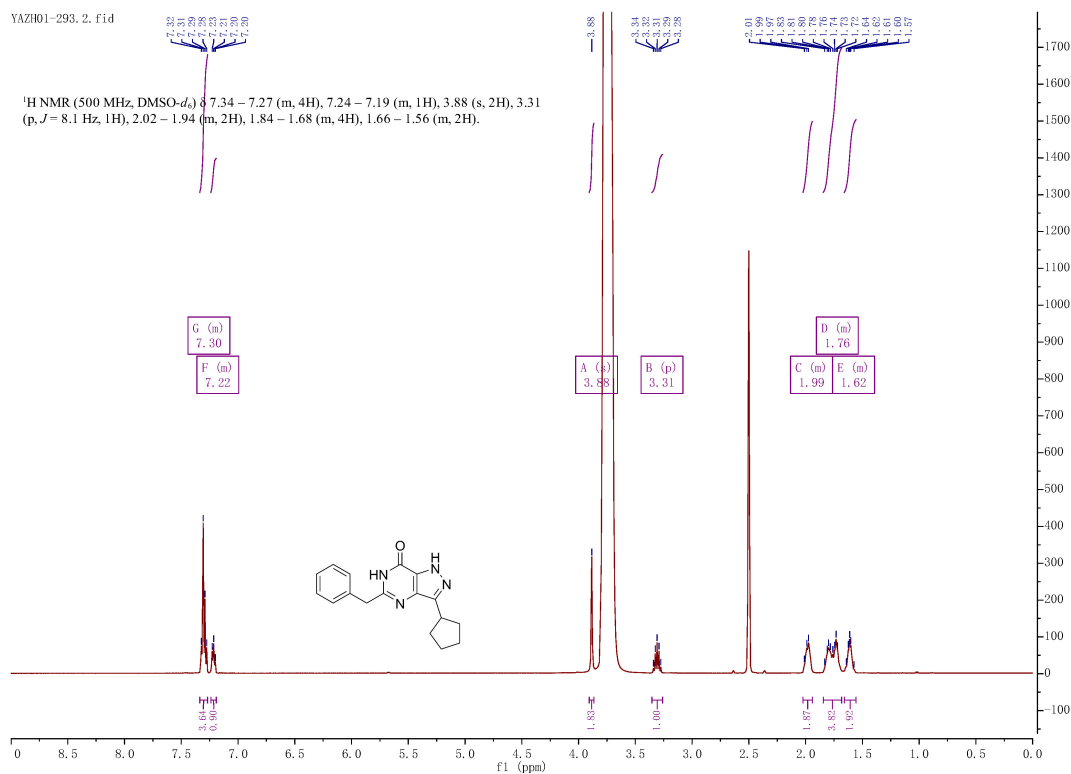

Figure S127. <sup>1</sup>H NMR spectrum of compound **46b**.

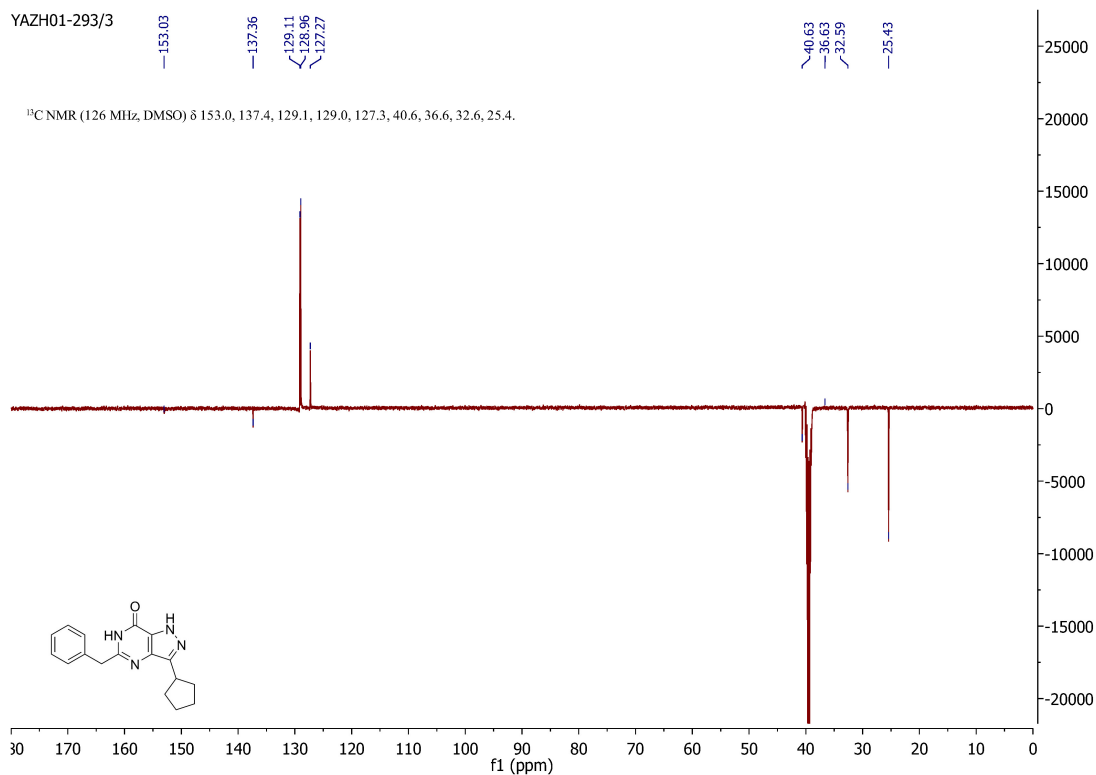

Figure S128. <sup>13</sup>C NMR spectrum of compound **46b**.

Acquired by : Admin  
 Date Acquired : 1/4/2019 10:29:47 AM  
 Sample Name : YAZH\_36  
 Sample ID :  
 Tray# : 1  
 Vial# : 6  
 Injection Volume : 3  
 Data File : C:\LabSolutions\Data\2019\2019-wk14\YAZH\_36.lcd  
 Background File : blanco 01042019.lcd  
 Method File : Method SCAN ACID standard.lcm  
 Report Format : DefaultL.CMS.lcr  
 Tuning File : C:\LabSolutions\Tuning\Tuning-ESI-pos-neg01072015a.lct  
 Processed by : Admin  
 Modified Date : 1/4/2019 10:46:16 AM

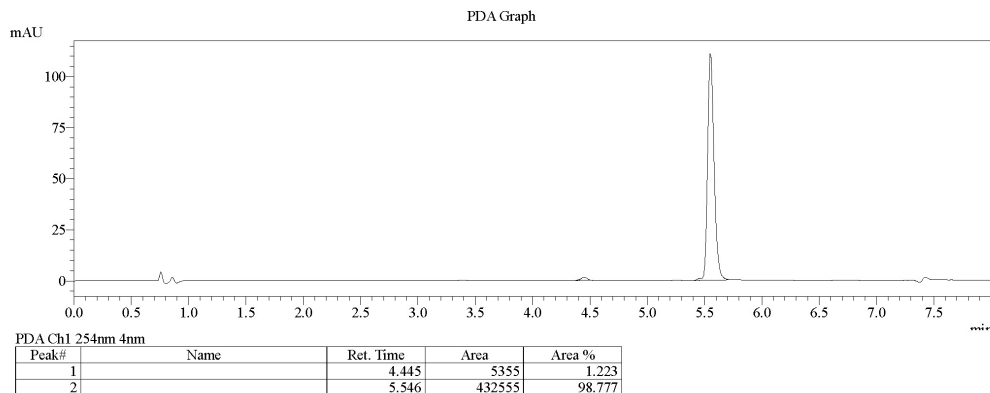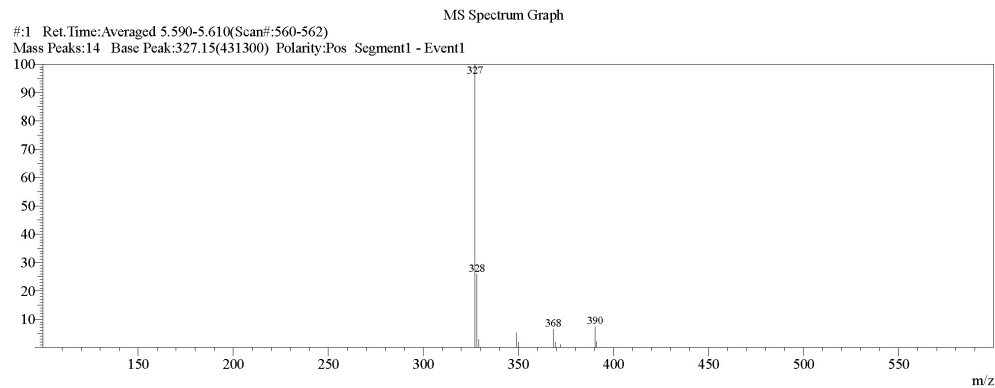

MS Spectrum Table

#1 Ret.Time:  
 BG Mode:Calc 5.470<->5.800(548<->581)  
 Mass Peaks:14 Base Peak:327.15(431300) Polarity:Pos Segment1 - Event1

| # | m/z    | Abs.Inten. | Rel.Inten. | Charge | Polarity | Monoisotopic | #  | m/z    | Abs.Inten. | Rel.Inten. | Charge | Polarity | Monoisotopic |
|---|--------|------------|------------|--------|----------|--------------|----|--------|------------|------------|--------|----------|--------------|
| 1 | 327.15 | 431300     | 100.00     |        |          |              | 8  | 372.15 | 4997       | 1.16       |        |          |              |
| 2 | 328.15 | 111634     | 25.88      |        |          |              | 9  | 390.20 | 32076      | 7.44       |        |          |              |
| 3 | 329.15 | 11967      | 2.77       |        |          |              | 10 | 391.15 | 9329       | 2.16       |        |          |              |
| 4 | 349.15 | 22488      | 5.21       |        |          |              | 11 | 675.45 | 12626      | 2.93       |        |          |              |
| 5 | 350.20 | 7721       | 1.79       |        |          |              | 12 | 680.40 | 7078       | 1.64       |        |          |              |
| 6 | 368.25 | 28144      | 6.53       |        |          |              | 13 | 681.05 | 8122       | 1.88       |        |          |              |
| 7 | 369.25 | 8672       | 2.01       |        |          |              | 14 | 681.90 | 6035       | 1.40       |        |          |              |

Figure S129. LCMS spectrum of compound **47a**.

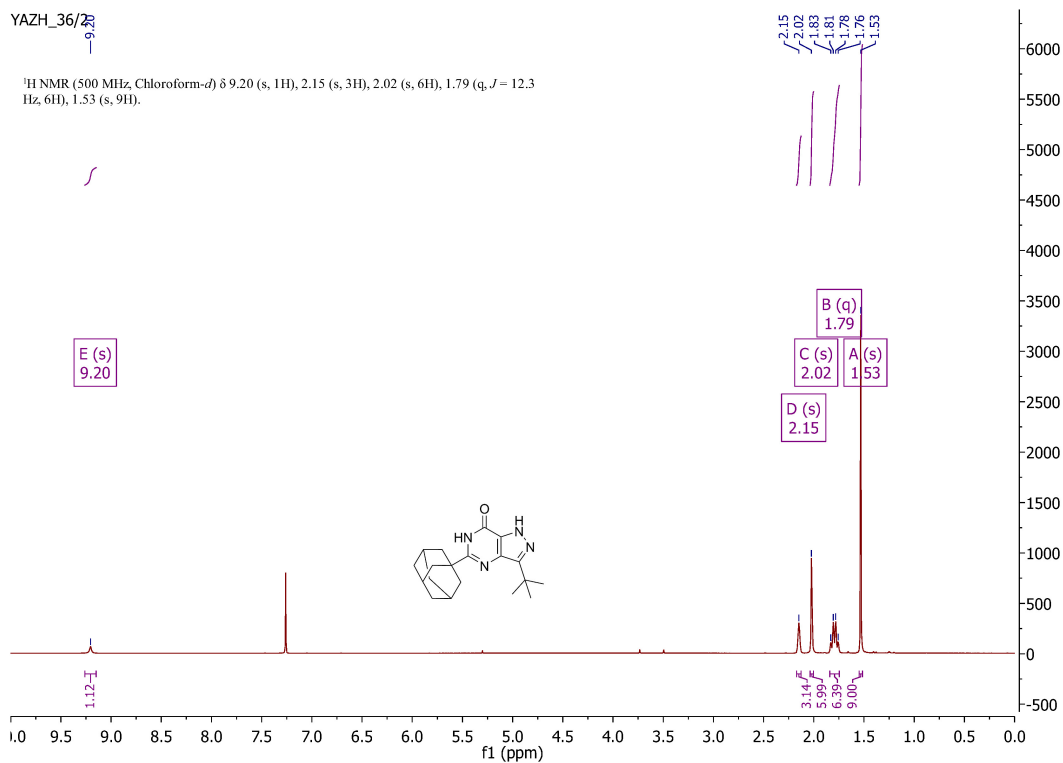

Figure S130. <sup>1</sup>H NMR spectrum of compound **47a**.

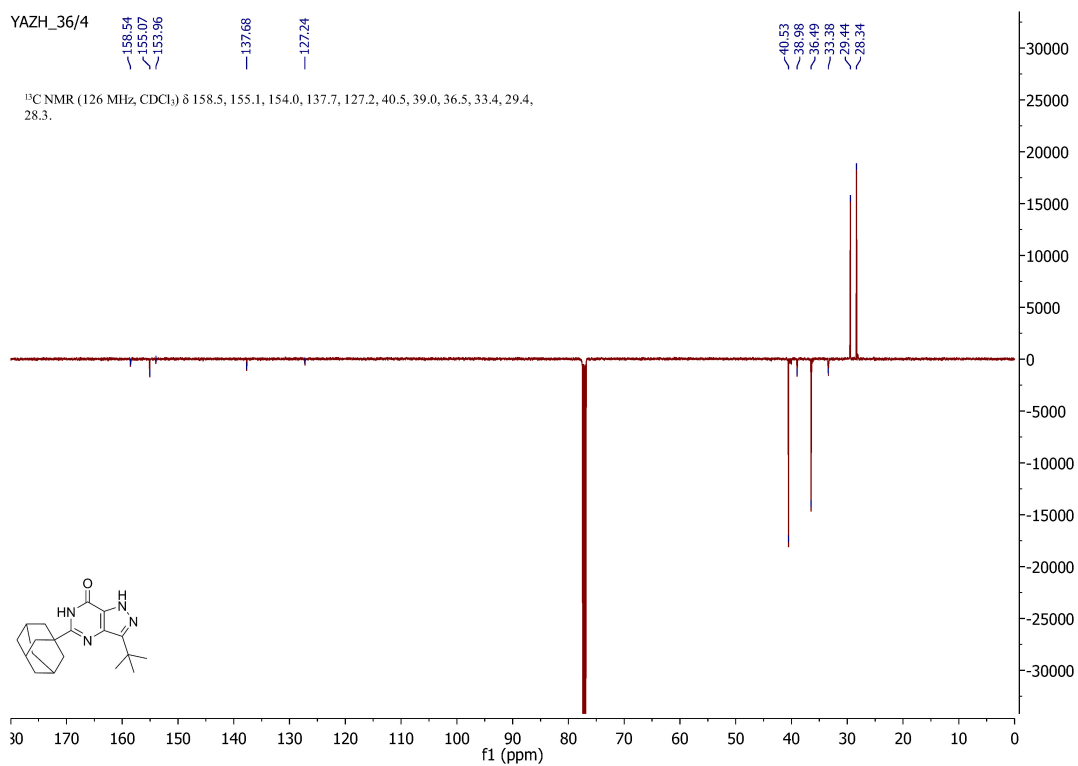

Figure S131. <sup>13</sup>C NMR spectrum of compound **47a**.



Acquired by : Admin  
 Date Acquired : 1/4/2019 10:55:50 AM  
 Sample Name : YAZH\_38  
 Sample ID :  
 Tray# : 1  
 Vial# : 7  
 Injection Volume : 3  
 Data File : C:\LabSolutions\Data\2019\wk14\YAZH\_38.lcd  
 Background File : blanco 01042019.lcd  
 Method File : Method SCAN ACID standard.lcm  
 Report Format : DefaultL.CMS.lcr  
 Tuning File : C:\LabSolutions\Tuning\Tuning-ESI-pos-neg01072015a.lct  
 Processed by : Admin  
 Modified Date : 1/4/2019 11:32:33 AM

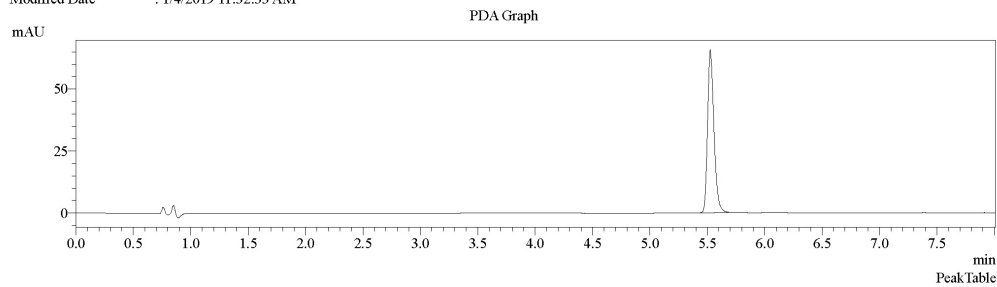

PDA Ch1 254nm 4nm

| Peak# | Name | Ret. Time | Area   | Area %  |
|-------|------|-----------|--------|---------|
| 1     |      | 5.521     | 254356 | 100.000 |

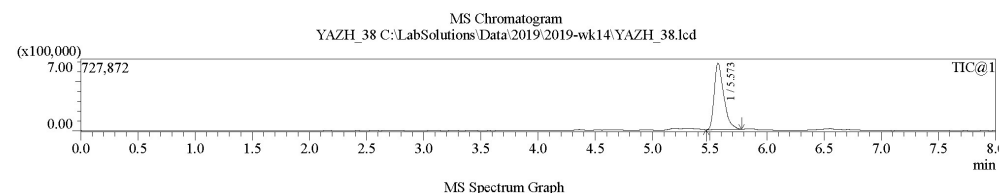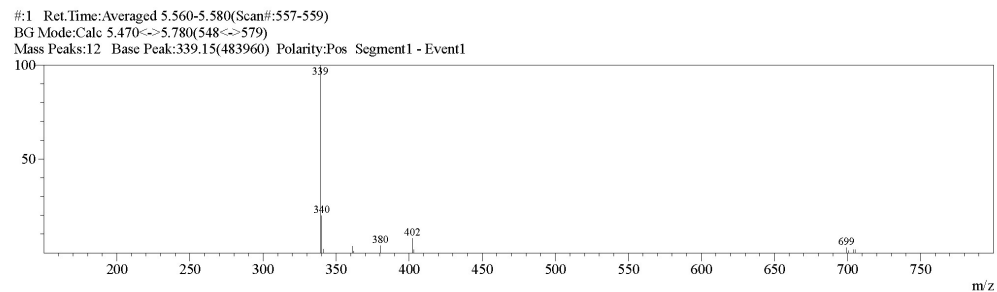

MS Spectrum Table

#1 Ret.Time:  
 BG Mode:Calc 5.470<->5.780(548<->579)  
 Mass Peaks:12 Base Peak:339.15(483960) Polarity:Pos Segment1 - Event1

| # | m/z    | Abs.Inten. | Rel.Inten. | Charge | Polarity | Monoisotopic | #  | m/z    | Abs.Inten. | Rel.Inten. | Charge | Polarity | Monoisotopic |
|---|--------|------------|------------|--------|----------|--------------|----|--------|------------|------------|--------|----------|--------------|
| 1 | 339.15 | 483960     | 100.00     |        |          |              | 7  | 402.15 | 37272      | 7.70       |        |          |              |
| 2 | 340.20 | 96147      | 19.87      |        |          |              | 8  | 403.20 | 8603       | 1.78       |        |          |              |
| 3 | 341.30 | 9476       | 1.96       |        |          |              | 9  | 699.35 | 13443      | 2.78       |        |          |              |
| 4 | 361.10 | 17293      | 3.57       |        |          |              | 10 | 700.40 | 6162       | 1.27       |        |          |              |
| 5 | 362.05 | 4905       | 1.01       |        |          |              | 11 | 704.40 | 7587       | 1.57       |        |          |              |
| 6 | 380.25 | 18775      | 3.88       |        |          |              | 12 | 705.15 | 7469       | 1.54       |        |          |              |

Figure S132. LCMS spectrum of compound **47b**.

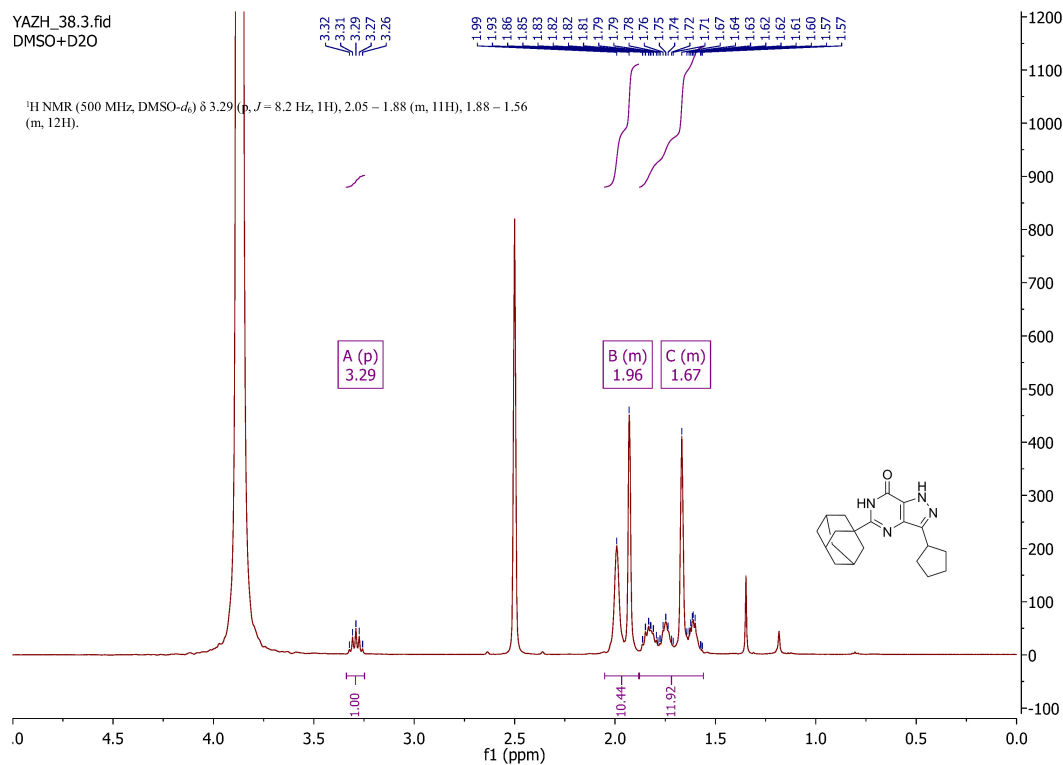

Figure S133.  $^1\text{H}$  NMR spectrum of compound **47b**.

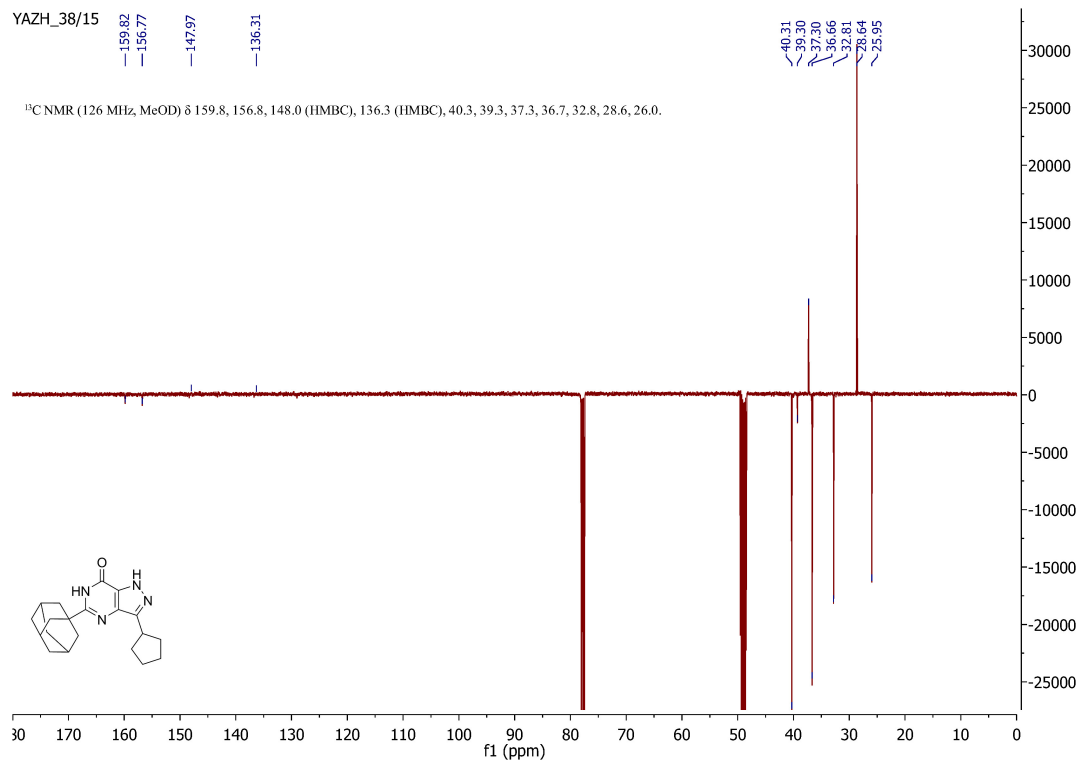

Figure S134.  $^{13}\text{C}$  NMR spectrum of compound **47b**.
